# Supplementary material
Source: MDPI journal article supplement (https://www.mdpi.com/2673-8112/2/11/109)
Supplement: s1 [file s1]

Archive with 2 entries (2 files):
- Figure S1 Questionnaire.pdf
- Table S1 journal data.xlsx
