# Supplementary material
Source: MDPI journal article supplement (https://www.mdpi.com/2673-8112/2/11/109)
Supplement: s1 [file s1 › Table S1 journal data.xlsx]

## Sheet: Sheet1
location (miq region=0, auckland=1)	Q5A I think helping to eliminate Covid-19 from New Zealand is rewarding	Q5B The consequences are serious if we don’t eliminate Covid-19 from New Zealand	Q5C Eliminating Covid-19 from New Zealand is something I am passionate about	Q5D It would be a big deal if the government made mistakes while we try to eliminate Covid-19 from New Zealand	Q5E My position on eliminating Covid-19 from New Zealand tells others something about me	Q5F Eliminating Covid-19 from New Zealand is important to me	Q5G Making decisions about how to eliminate Covid-19 from New Zealand is complicated	Q5H What others think about eliminating Covid-19 from New Zealand tells me something about them	Q5I I care a lot about eliminating Covid-19 from New Zealand	Q5J Making decisions about how to eliminate Covid-19 from New Zealand is difficult	Q4A Eliminating Covid-19 from New Zealand is the right thing to do (elimination attitude)	Q6A I think it’s rewarding to wear a face mask to help eliminate Covid-19	Q6B The consequences are serious if I made mistakes with wearing a face mask to help eliminate Covid-19	Q6C Wearing a face mask to help eliminate Covid-19 is something I am passionate about	Q6D It would be a big deal if I made a mistake with wearing face masks to help eliminate Covid-19	Q6E My position about wearing a face mask to help eliminate Covid-19 tells others something about me	Q6F Wearing a face mask to help eliminate Covid-19 is important to me	Q6G Making decisions about wearing a face mask to help eliminate Covid-19 is complicated	Q6H What others think about wearing a face mask to help eliminate Covid-19 tells me something about them	Q6I I care a lot about wearing a face mask to help eliminate Covid-19	Q6J Making decisions about wearing a face mask to help eliminate Covid-19 is difficult	Q7A I think face masks should be worn to help stop the spread of Covid-19	Q7B I think wearing face masks to stop the spread of Covid-19 is the right thing to do	Q7C I believe it is wrong to wear face masks to stop the spread of Covid-19	Q7D I think it would be good to wear face masks to stop the spread of Covid-19	Q12A I think staying at home if you feel unwell to help eliminate Covid-19 would be rewarding	Q12B The consequences would be serious if I made a mistake around staying at home if I felt unwell	Q12C I am passionate about staying at home if I feel unwell	Q12D Making mistakes about staying at home if you were feeling unwell are a big deal	Q12E My position about staying at home if I feel unwell tells others something about me	Q12F Staying at home if I feel unwell is important to me	Q12G Making decisions about staying at home if you feel unwell is complicated	Q12H What others think about staying at home if they feel unwell tells me something about them	Q12I I care a lot about the need to stay home if I feel unwell	Q12J Making decisions about staying at home if I feel unwell is difficult	Q13A I think people should stay home if they feel unwell	Q13B I think staying at home if you feel unwell is the right thing to do	Q13C I believe it is wrong to stay at home if you feel unwell	Q13D I think it is a good thing if people who feel unwell stay at home	Q18A I think getting tested to help eliminate Covid-19 is rewarding	Q18B The consequences are serious if I make a mistake about getting tested for Covid-19	Q18C Getting tested for Covid-19 is something I am passionate about	Q18D It would be a big deal if I made a mistake with getting tested for Covid-19	Q18E My position about getting tested for Covid-19 tells others something about me	Q18F Getting tested for Covid-19 is important to me	Q18G Making decisions about getting tested for Covid-19 is complicated	Q18H What others think about getting tested for Covid-19 tells me something about them	Q18I I care a lot about getting tested for Covid-19	Q18J Making decisions about getting tested for Covid-19 is difficult
0	4	3	2	4	2	1	2	3	3	1	4	3	2	3	2	2	4	3	1	1	2	2	3	3	4	4	2	4	2	3	2	3	3	3	1	2	3	3	3
0	4	4	4	3	4	4	4	4	4	4	4	4	3	4	3	4	4	4	4	4	3	4	4	2	4															4	3	4	4	4	4	4	4	4	4
0	5	5	5	1	5	5	5	5	5	5	5	5	5	5	1	5	5	5	5	5	5	5	5	1	5															5	5	5	5	5	5	1	5	5	1
0	5	5	5	5	5	5	3	4	5	2	5	5	5	5	5	4	4	2	4	4	2	4	4	1	4	5	5	5	5	5	5	3	5	5	3	5	5	1	5
0	2	2	2	5	4	2	2	4	1	2	2															1	2	1	2	3	2	1	3	2	4	4	4	2	4	1	2	1	2	3	2	2	2	3	2
0	5	5	3	4	5	5	5	5	5	5	5	4	5	3	3	5	3	3	2	2	3	3	3	1	3	5	5	5	3	5	5	1	5	5	1	5	5	1	5
0	4	5	5	4	5	5	5	4	5	5	5															5	5	5	2	4	5	5	5	5	2	5	5	2	5	5	5	4	5	5	5	2	4	5	2
0	4	5	4	5	3	5	4	3	5	4	5															3	5	5	5	5	5	1	5	5	1	5	5	1	5	3	5	5	5	5	5	1	5	5	1
0	4	5	4	5	5	5	5	5	5	5	5	3	3	3	3	3	3	3	3	3	3	3	3	3	3															4	4	4	3	4	4	2	4	4	2
0	3	3	3	4	3	4	4	3	4	4	4															3	3	4	3	3	4	3	3	4	3	4	4	2	4	3	3	2	3	3	3	4	3	2	4
0	3	4	4	4	4	4	4	4	4	4	4	4	4	4	4	4	4	2	4	4	2	3	3	2	3	4	4	4	2	4	4	2	4	4	2	4	5	2	4
0	4	4	4	4	3	4	4	3	4	4	4	4	3	4	3	3	4	2	3	4	2	4	4	2	4	4	4	4	4	3	4	2	3	4	2	5	5	2	5
0	5	4	1	5	5	5	5	5	5	5	5	5	5	5	5	5	5	5	5	5	5	5	5	1	5	5	1	5	1	5	5	2	5	5	1	5	5	1	5
0	5	5	4	4	4	4	4	5	4	4	5															4	4	4	4	4	4	4	4	4	4	4	4	4	4	4	4	4	3	4	4	4	4	4	2
0	5	5	5	4	5	5	2	5	5	4	5															5	5	5	5	5	5	2	4	5	1	5	5	1	5	5	5	5	5	5	5	1	5	5	1
0	4	4	4	4	4	4	4	4	4	4	3	5	4	5	5	5	5	5	5	5	5	5	5	1	5															4	4	4	4	4	4	2	4	4	2
0	5	5	5	3	5	5	5	5	5	5	5															4	5	4	5	4	5	3	4	4	3	4	5	1	4	5	3	3	2	4	5	1	4	5	1
0	3	4	4	4	4	4	5	4	4	5	5	3	4	4	3	4	4	4	4	4	1	5	5	1	5															3	5	4	5	4	4	2	4	4	2
0	3	4	3	4	3	4	4	3	4	4	4															3	3	4	3	3	4	2	3	4	2	4	4	1	4	3	3	2	3	3	3	3	3	3	3
0	5	5	5	5	4	5	2	4	5	2	5	5	5	4	4	4	5	1	4	4	1	5	5	1	5															5	1	4	1	4	5	1	4	4	1
0	4	5	5	2	3	5	4	3	5	4	5															3	3	4	5	4	5	2	3	5	2	5	5	1	5	4	3	1	3	3	2	4	3	1	3
0	5	5	5	4	3	5	4	4	5	4	5	4	3	4	2	4	4	2	4	4	2	4	4	2	4	5	5	5	4	3	5	2	4	5	2	5	5	1	5
0	5	4	5	3	4	5	3	5	5	4	4															5	5	5	5	4	5	3	5	5	4	5	5	5	5	5	4	5	5	5	5	3	3	5	5
0	4	3	2	3	3	2	3	2	3	3	3	2	3	2	3	3	4	3	2	3	3	4	3	3	4															2	4	3	4	3	3	3	3	4	3
0	2	2	2	2	3	3	4	3	3	4	4	3	2	3	2	4	4	2	3	3	2	4	4	1	4															3	2	3	4	2	4	4	2	2	3
0	4	5	4	4	3	5	2	3	4	4	5	4	4	4	3	3	4	2	3	4	2	4	4	2	4	5	4	5	5	3	5	2	3	5	2	5	5	1	5
0	1	1	1	5	5	1	3	3	1	3	1															5	5	5	5	5	5	1	5	5	1	5	5	1	5	1	5	1	5	5	1	1	5	1	1
0	4	4	4	3	4	4	3	3	4	3	4	4	3	3	3	3	3	3	3	2	3	4	3	3	3															4	3	4	2	4	4	2	2	4	2
0	3	4	4	4	4	4	4	4	4	4	4															5	5	5	5	5	5	5	5	5	5	5	5	1	5	4	4	2	3	3	3	2	3	2	2
0	3	1	4	3	2	5	2	4	4	5	3															4	5	5	3	1	3	2	4	2	4	5	2	4	3	2	1	5	4	4	4	3	2	3	5
0	5	5	5	4	5	5	3	4	5	3	5	3	3	3	3	3	3	3	3	3	3	3	4	2	3	5	4	5	5	4	5	1	4	5	1	5	5	1	5
0	1	2	1	5	1	1	1	1	1	2	3	2	2	3	2	2	3	2	1	3	2	5	5	1	5															2	1	2	4	1	3	1	1	3	3
0	4	4	4	5	3	4	4	3	4	4	4	3	3	3	3	2	3	4	3	3	4	4	4	3	4															4	4	3	4	2	4	4	2	3	4
0	5	4	4	3	4	5	4	4	5	4	5	4	2	4	1	4	4	1	4	4	1	5	5	1	5	5	4	4	4	4	5	1	5	5	1	5	5	1	5
0	3	2	3	4	4	4	2	4	3	2	4															5	3	5	4	4	5	1	5	4	1	4	4	1	4	4	4	2	4	3	3	2	4	2	2
0	4	4	4	3	4	4	4	4	4	4	5	4	4	4	4	4	4	1	4	4	1	5	5	1	5	4	5	4	5	4	4	1	4	4	1	5	5	1	5
0	5	5	5	5	5	5	3	5	5	3	5															5	5	5	5	5	5	1	5	5	1	5	5	1	5	5	5	5	5	5	5	2	5	5	1
0	4	4	4	2	4	5	4	4	5	4	5															4	5	5	5	4	5	2	4	5	1	5	5	1	5	5	4	5	3	4	5	1	4	4	1
0	4	4	3	4	3	4	4	3	4	4	4															4	4	4	4	3	4	2	3	4	2	4	4	2	4	4	4	3	4	3	4	3	3	4	3
0	5	5	4	4	5	5	4	4	5	4	5	5	5	5	5	5	5	5	5	5	5	5	5	5	5	5	4	4	2	4	5	2	5	4	2	5	5	2	5
0	3	4	3	4	2	4	5	4	4	5	4	2	3	2	3	3	2	3	3	2	3	3	3	3	3	2	3	2	3	3	2	5	2	3	5	3	3	2	3
0	4	4	3	5	5	4	5	5	4	5	5	3	3	3	4	4	4	5	4	3	5	4	4	1	4															3	3	3	4	5	3	2	5	3	1
0	5	5	4	4	5	5	5	5	5	4	4	4	4	4	4	4	4	2	5	4	2	5	5	1	5															5	5	5	5	5	5	2	5	5	5
0	4	4	4	3	4	4	4	4	4	4	4	4	3	4	3	4	4	4	4	4	3	4	4	2	4	4	3	4	3	4	4	3	4	4	3	4	4	2	4
0	3	3	2	4	3	3	2	3	3	2	4															2	2	2	3	2	2	2	2	2	3	3	3	2	3	2	3	1	3	2	1	3	2	2	3
0	4	5	4	5	4	4	3	5	5	4	5	4	3	4	3	4	4	2	5	4	2	5	5	1	5															4	3	3	3	4	4	3	4	3	3
0	5	4	4	4	4	5	4	4	4	5	5	4	4	3	4	4	4	2	4	4	2	4	4	2	4															4	4	4	4	4	4	2	4	4	2
0	3	3	3	3	3	3	3	3	3	3	3	3	3	3	3	3	3	3	3	3	3	3	3	3	3	3	3	3	3	3	3	3	3	3	3	3	3	3	3
0	3	5	5	4	5	5	4	3	5	5	5	5	1	4	1	5	5	1	5	5	1	5	5	1	5															4	3	4	3	4	4	1	4	3	1
0	5	5	5	5	5	5	5	4	5	5	5															5	5	3	5	5	4	3	5	5	3	5	5	1	5	5	5	5	5	5	5	1	5	5	1
0	4	4	4	4	4	4	4	4	4	4	4	4	5	4	4	4	4	4	4	4	4	5	5	5	5	4	4	4	4	4	4	4	4	4	5	5	5	2	5
0	4	5	5	4	4	4	3	4	3	3	4	5	4	4	4	3	4	3	3	4	3	4	4	3	4															4	4	5	3	3	4	2	4	5	3
0	2	4	4	4	3	3	3	4	3	4	3	3	4	4	3	3	3	4	3	3	4	4	4	3	4	5	4	4	5	4	4	4	3	5	4	5	4	5	4
0	5	1	5	2	5	5	3	5	5	2	5															4	5	5	5	5	5	2	5	5	1	5	5	2	5	4	5	4	5	5	5	2	5	5	1
0	5	5	4	4	5	5	5	5	5	5	5	5	5	5	4	5	5	4	5	5	5	5	5	1	5	5	5	5	1	4	5	2	4	5	1	5	5	1	5
0	4	4	1	2	4	4	2	2	3	2	2	3	4	2	3	3	5	4	5	2	2	2	3	4	4															2	3	5	4	4	4	2	2	4	2
0	4	4	4	4	4	4	3	4	4	3	4	4	4	4	4	4	4	3	4	4	3	4	4	2	4	4	4	4	4	4	4	2	4	4	2	4	4	2	4
0	5	5	5	5	5	5	5	5	5	5	5	5	5	5	5	5	5	5	5	5	5	5	5	5	5	5	5	5	5	5	5	1	5	5	1	5	5	5	5
0	3	3	3	3	3	3	3	4	3	4	3	3	3	3	3	3	3	3	3	3	3	3	3	3	3	3	3	5	4	3	4	2	3	4	2	5	5	1	5
0	4	5	3	4	4	5	5	4	4	5	5	3	2	2	2	2	2	4	2	2	4	3	2	2	3	4	5	5	5	4	5	4	4	5	5	5	5	1	5
0	3	4	3	3	4	4	3	3	3	4	4															4	4	4	4	4	4	4	4	4	2	4	4	2	4	4	4	3	4	4	4	2	4	3	2
0	3	3	3	3	3	3	3	3	3	3	3	3	3	3	3	3	3	3	3	3	3	3	3	3	3															3	3	3	3	3	3	3	3	3	3
0	4	4	3	4	3	3	4	4	4	4	4	3	4	3	3	4	4	4	4	3	5	4	4	3	3															3	4	4	4	4	3	4	4	3	3
0	5	5	5	4	5	5	3	5	5	3	5															4	3	2	4	4	4	2	4	3	4	5	5	2	5	5	3	5	4	5	5	2	5	4	2
0	3	4	3	3	3	3	4	3	4	4	4	4	4	3	4	4	4	4	4	3	3	4	4	2	4															3	3	4	4	3	3	2	4	4	3
0	3	3	3	3	3	4	3	4	4	2	4															3	5	2	4	3	4	2	4	4	2	5	5	1	5	3	4	2	4	4	4	2	4	3	2
0	4	5	5	4	5	5	2	5	5	2	5	5	5	5	5	5	5	5	5	5	5	5	5	1	5	5	5	5	5	5	5	5	5	5	5	5	5	1	5
0	4	4	4	4	4	4	4	4	4	4	4															4	4	4	4	4	4	4	4	4	4	4	4	1	4	4	4	4	4	4	4	4	4	4	4
0	5	4	5	4	4	5	4	4	5	4	5	5	5	4	5	5	5	5	4	5	5	4	5	1	5	5	5	5	5	4	5	2	5	5	1	5	5	5	5
0	4	4	4	2	4	4	4	4	4	3	4	4	4	4	3	3	4	2	3	4	2	4	4	2	4	4	4	4	2	4	4	2	3	4	2	4	4	2	4
0	5	5	5	5	5	5	5	5	5	5	5	5	5	5	5	5	5	3	5	5	4	5	5	2	5															5	3	5	5	5	5	3	5	5	4
0	5	4	4	3	4	4	4	4	4	2	5	3	3	3	3	4	4	4	4	4	5	4	3	2	3															3	5	4	4	4	3	2	4	3	2
0	2	4	2	5	4	3	4	3	3	4	3															2	4	4	5	4	4	4	4	4	5	5	5	1	5	2	4	3	4	4	4	2	4	4	2
0	5	5	5	4	4	5	4	4	5	4	5	5	4	5	4	4	5	2	4	5	2	5	5	1	5	5	5	5	4	5	5	2	5	5	2	5	5	1	5
0	1	3	5	5	4	3	2	4	1	3	3	2	3	4	1	3	4	2	3	5	2	3	2	3	5															5	3	1	3	4	2	2	5	3	1
0	5	5	5	5	5	5	5	5	5	5	5	4	5	5	5	5	5	2	5	5	2	5	5	1	5	5	5	5	5	5	5	1	5	5	1	5	5	1	5
0	3	4	2	4	3	4	2	3	2	2	3															5	3	4	2	3	3	1	2	4	3	4	5	3	2	2	3	3	4	1	3	2	2	2	3
0	5	4	4	4	4	4	3	5	5	2	5															3	4	4	3	3	4	3	4	4	3	4	4	1	4	5	3	4	3	4	4	1	4	4	1
0	4	3	4	4	4	4	4	4	4	4	4															4	4	4	3	3	3	4	3	4	4	4	4	3	4	4	4	4	4	3	5	2	4	4	2
0	4	4	3	4	5	3	3	5	4	4	2															4	2	4	3	2	3	5	4	3	2	1	4	5	3	1	1	4	3	1	1	3	5	4	1
0	2	3	2	5	2	3	5	2	3	3	3	1	1	1	1	1	1	1	4	1	1	1	1	5	1	2	2	2	2	2	3	2	4	3	2	3	3	2	3
0	4	4	4	4	4	4	4	4	4	4	4	3	3	3	3	3	3	4	3	3	3	4	3	2	3	4	5	4	4	4	4	4	4	4	4	4	4	2	4
0	4	4	4	4	4	4	4	4	4	4	4															4	4	4	4	4	4	2	4	4	2	4	4	2	4	4	4	4	4	4	4	2	4	4	2
0	4	4	4	3	3	4	4	4	4	4	4	4	3	3	4	3	4	4	4	4	3	4	4	2	4															4	4	3	4	3	4	4	3	4	3
0	5	5	5	5	5	5	5	5	5	5	5	5	5	5	5	5	5	5	5	5	5	5	5	5	5	5	5	5	5	5	5	5	5	5	5	5	5	1	5
0	5	5	5	4	4	5	4	4	5	4	5	4	4	5	5	4	4	4	4	4	4	4	5	1	4															4	4	3	4	4	3	4	3	4	4
0	5	5	5	1	5	5	3	4	5	3	5	5	5	5	3	5	5	1	5	5	1	5	5	1	5	5	2	5	3	5	5	1	5	5	2	5	5	1	5
0	1	1	1	5	3	4	3	1	4	4	1	3	4	4	1	3	5	1	1	1	4	1	5	4	1															1	5	4	1	4	4	4	3	1	1
0	1	4	3	3	2	5	5	2	4	3	2	2	3	1	2	5	3	4	5	3	2	1	5	3	2															5	1	5	4	3	2	2	2	5	4
0	4	3	4	4	4	3	4	4	4	4	4															4	4	3	4	4	4	4	3	3	3	2	4	4	4	4	3	4	2	4	2	4	4	3	4
0	5	4	4	3	4	4	4	5	4	4	5															4	4	4	3	4	4	3	4	4	3	4	4	2	4	4	3	3	4	3	3	2	4	3	2
0	4	4	4	2	4	4	4	4	4	4	4	4	4	2	4	4	4	2	4	4	2	4	4	2	4	4	4	4	4	4	4	2	4	4	2	4	4	2	4
0	4	4	5	4	4	5	2	4	5	2	4	4	2	4	2	4	4	2	4	4	2	3	4	1	4															4	4	3	2	3	4	1	4	4	2
0	4	4	4	4	4	4	4	4	4	4	4	4	4	4	4	4	4	4	4	4	4	4	4	4	4	4	4	4	4	4	4	4	4	4	4	4	4	4	4
0	4	5	5	4	3	5	4	5	5	2	5	4	5	3	4	4	3	5	2	3	4	4	2	3	5	5	4	3	3	5	3	1	3	1	1	5	5	2	4
0	4	4	3	4	4	4	2	4	4	2	4	4	4	2	4	4	4	4	4	3	4	3	3	2	3															3	4	2	3	3	2	2	3	2	3
0	4	4	4	4	5	5	4	5	4	4	5															4	4	5	3	4	4	4	5	4	4	5	5	4	5	5	4	4	4	4	4	4	4	5	5
0	5	5	4	4	4	4	5	4	4	4	5															5	5	5	2	5	5	1	5	5	1	5	5	1	5	5	3	4	4	4	4	1	4	4	1
0	3	3	2	4	2	2	4	2	2	4	4	3	3	3	3	2	3	2	2	3	4	4	4	2	4															4	3	2	2	4	3	3	4	4	3
0	4	4	4	3	4	4	4	4	4	4	4	3	3	3	3	4	4	3	4	3	4	3	3	2	3															4	4	4	4	4	4	3	4	4	3
0	5	3	3	3	3	5	3	2	3	3	4															3	4	3	3	5	3	3	3	3	3	4	5	1	5	3	3	3	3	3	3	3	3	3	3
0	4	4	4	4	4	4	4	4	4	4	4															4	4	4	4	4	4	4	4	4	4	4	4	4	4	4	4	4	4	4	4	4	4	4	4
0	5	5	4	5	4	5	5	5	5	5	5															5	5	4	5	5	4	3	5	5	3	4	4	2	4	4	5	3	5	4	3	3	5	3	3
0	3	4	4	4	4	4	4	5	4	3	5	4	4	4	4	4	4	2	4	4	2	4	4	1	4	4	5	4	5	4	4	3	4	4	2	5	5	1	4
0	5	4	5	4	5	5	2	5	5	4	4	5	5	5	3	5	5	3	4	5	2	5	5	1	5															5	4	5	5	5	5	2	5	5	2
0	4	4	3	4	4	4	4	4	4	4	5	4	3	3	3	4	4	2	4	4	2	4	4	2	4															3	3	3	4	4	3	2	3	3	2
0	4	4	3	4	4	4	4	4	4	4	4															4	4	4	4	4	4	4	4	4	4	4	4	1	4	4	4	2	2	3	3	2	3	3	2
0	4	4	3	4	2	4	3	2	4	4	4	3	3	3	3	3	3	3	3	3	3	4	4	2	4															3	3	3	3	3	3	3	3	3	3
0	4	3	3	5	4	4	4	3	4	4	4															5	5	5	5	5	5	5	5	5	5	5	5	2	5	5	5	5	5	5	5	5	5	5	5
0	4	4	4	4	4	4	4	4	4	4	4	3	3	3	3	3	3	3	3	3	3	4	4	4	4	3	3	3	3	3	3	3	3	3	3	4	4	4	4
0	4	5	3	4	4	4	4	4	3	4	4															4	5	5	4	4	3	3	4	4	4	3	4	4	4	3	4	3	5	4	3	4	4	4	5
0	3	5	2	4	3	4	2	3	4	2	5	3	4	1	4	3	3	2	4	4	2	4	4	1	4	2	5	2	5	4	5	1	3	5	1	5	5	1	5
0	4	5	4	5	4	5	5	5	5	5	5															3	5	5	5	5	5	2	5	5	3	5	5	1	5	3	4	3	5	3	4	4	2	3	4
0	4	4	4	5	4	5	4	4	4	2	5	4	4	5	4	4	4	2	4	3	2	5	4	1	4															4	3	4	4	4	3	1	4	4	2
0	4	4	5	4	4	5	4	4	4	5	4	4	4	5	5	4	5	4	5	4	4	5	4	4	5															5	2	4	3	4	4	4	4	4	5
0	5	5	5	5	5	5	1	5	5	1	5															5	4	5	4	5	5	2	5	5	2	5	5	1	5	5	2	5	3	5	5	1	5	5	1
0	3	4	3	3	4	4	4	4	4	4	4															3	3	4	3	4	4	2	4	4	3	4	4	2	4	3	4	4	4	4	4	2	4	4	2
0	1	1	1	5	1	1	1	1	1	1	1	1	1	1	1	1	1	1	1	1	1	1	2	2	2															1	1	1	1	1	1	1	1	1	1
0	5	5	4	5	5	5	5	5	5	5	5															5	5	4	5	4	5	4	5	5	4	5	5	1	5	5	5	4	5	4	5	4	4	5	4
0	4	4	4	4	2	4	2	3	4	2	4	3	3	3	3	3	3	3	3	3	3	3	3	3	3	4	3	3	3	3	3	3	3	4	2	4	4	2	4
0	4	4	4	4	4	4	4	4	4	3	4	4	4	4	3	4	4	4	4	4	4	4	5	4	4															4	4	4	3	3	4	4	3	3	4
0	4	4	4	4	4	5	4	4	4	4	5	3	3	2	3	3	3	4	3	3	3	3	3	2	4	5	5	4	5	4	5	2	5	5	1	5	5	1	5
0	4	4	3	4	4	4	4	4	4	4	4															4	4	3	4	4	4	4	4	4	4	4	4	2	4	4	4	4	4	4	4	4	4	4	4
0	5	5	5	2	4	5	3	5	5	3	5	3	3	3	2	4	3	1	4	3	1	3	3	2	3	5	5	5	1	5	5	1	4	5	1	5	5	1	5
0	3	5	3	5	3	4	4	4	3	4	5															5	5	4	5	2	5	4	2	5	4	1	1	1	1	5	5	3	5	3	4	2	3	4	1
0	2	1	1	5	2	1	2	3	2	2	2	1	2	1	2	2	1	3	3	1	3	1	2	3	1															1	2	1	3	2	1	2	2	1	2
0	4	4	4	4	3	4	4	3	4	4	4															4	4	4	4	3	5	2	4	4	2	5	5	1	5	3	4	4	5	3	4	2	3	3	1
0	4	5	4	5	3	5	3	4	5	3	5															5	3	5	2	5	5	2	4	5	2	5	5	2	5	5	5	4	5	5	5	1	5	5	1
0	3	3	4	4	4	4	3	3	3	3	4															4	3	4	3	3	4	3	3	3	3	3	3	3	3	3	4	4	3	3	3	4	3	4	4
0	4	4	4	5	4	4	5	4	4	4	4															5	5	4	5	4	4	2	2	4	4	5	5	2	4	3	4	3	4	3	3	2	4	3	3
0	4	4	3	3	2	4	3	3	4	3	4	4	4	3	4	3	4	2	4	4	2	4	4	1	4															4	4	3	4	3	4	2	4	4	2
0	4	4	3	5	2	5	3	3	4	4	5															4	3	4	5	3	5	1	4	5	1	5	5	1	5	3	3	2	3	2	2	2	2	3	1
0	3	3	4	2	3	3	3	4	2	4	4	4	4	4	3	4	2	4	4	3	3	3	2	2	3															4	4	4	3	4	4	3	4	4	4
0	1	1	1	5	3	1	2	4	1	2	1															4	3	4	3	3	4	2	3	3	3	5	5	1	4	2	2	1	3	2	1	2	4	1	2
0	4	4	3	4	4	4	4	3	4	4	4	3	4	4	2	5	3	4	3	4	4	4	3	4	3	4	4	4	3	4	4	4	4	3	4	3	3	3	3
0	4	5	4	3	4	5	5	3	4	4	5	3	3	4	3	4	4	4	3	5	2	4	5	1	4															4	5	4	5	4	5	2	3	4	2
0	5	5	5	5	5	5	2	5	5	1	5	1	2	1	1	4	2	3	4	1	2	2	2	3	2	5	4	4	4	4	4	4	4	4	4	4	4	4	4
0	4	5	5	4	4	5	5	4	5	5	5	3	4	3	4	4	4	2	5	4	2	4	5	1	4															3	4	4	4	3	5	1	4	4	1
0	4	4	4	4	4	4	4	4	4	4	4	4	4	4	4	4	4	2	4	4	2	4	4	2	4															4	4	4	4	4	4	2	3	4	2
0	4	5	4	4	4	5	2	3	5	2	5	4	4	4	4	4	4	2	4	4	2	5	5	2	5															4	4	4	4	4	4	2	4	4	2
0	5	5	5	5	5	5	1	5	5	1	5	4	5	3	5	4	4	1	5	3	2	5	4	1	5	5	5	5	1	5	5	1	5	5	1	5	5	1	5
0	4	4	4	4	4	4	2	4	4	4	4	4	4	4	4	4	4	2	4	4	2	4	4	2	4	4	2	4	4	4	4	2	4	4	2	4	4	2	4
0	3	4	2	4	2	3	4	2	3	4	3	2	3	2	4	2	3	4	2	2	3	2	2	4	2															1	4	2	3	2	3	2	2	2	2
0	5	4	4	4	4	4	4	4	5	4	5	4	4	4	4	4	4	3	4	4	4	4	4	2	4	4	4	4	4	4	4	4	4	4	4	4	4	2	4
0	4	2	5	4	2	3	3	1	3	5	2	1	5	3	4	3	2	2	5	4	3	3	3	5	2															1	2	5	4	3	4	2	3	1	5
0	3	5	4	2	4	5	4	4	4	4	4	3	4	2	3	4	3	4	4	3	4	3	3	2	3															4	4	3	4	4	4	3	4	4	2
0	5	5	5	2	5	5	4	5	5	2	5	5	4	5	3	5	5	3	5	5	2	5	5	1	5															5	2	5	2	5	5	2	5	5	2
0	3	5	4	5	3	4	5	3	4	4	5	4	3	4	2	3	4	2	3	5	2	4	4	1	4															5	5	4	5	3	5	1	3	5	1
0	3	4	3	3	3	3	4	3	3	3	4															3	3	3	3	3	3	3	3	3	3	3	3	3	3	3	3	3	3	3	3	3	3	3	3
0	4	4	3	3	4	3	3	3	3	4	3	3	4	4	4	4	3	4	4	3	4	4	4	4	4															4	4	4	4	4	4	4	4	5	4
0	4	4	4	4	4	4	3	4	4	3	2	5	4	3	3	4	4	4	4	4	2	4	3	3	4	4	2	3	4	3	2	4	3	3	2	3	4	2	4
0	4	5	4	5	3	5	4	4	3	4	5	4	2	4	1	4	4	3	4	4	2	5	5	1	4															4	3	4	2	3	4	2	4	4	2
0	5	5	5	5	5	5	5	5	5	5	5															5	5	5	5	5	5	1	5	5	1	5	5	1	5	5	5	5	5	5	5	1	5	5	1
0	5	4	5	3	3	5	5	3	5	5	4	3	3	4	3	2	5	1	4	5	1	5	5	1	5	5	3	4	3	3	4	2	2	4	1	5	5	1	5
0	5	5	5	5	5	5	5	5	5	5	5															5	5	5	5	5	5	5	5	5	5	5	5	5	5	5	5	5	5	5	5	1	5	5	1
0	3	3	2	1	1	1	4	3	5	1	3	1	5	2	3	5	3	1	4	3	1	3	3	5	1	1	5	5	1	5	3	4	2	4	3	1	5	4	1
0	4	5	3	5	3	5	3	4	4	4	5	5	2	4	3	5	5	2	4	4	3	5	5	5	5	4	4	4	5	5	5	2	3	5	3	5	5	1	5
0	5	5	5	5	5	5	5	5	5	5	5	5	5	5	4	5	5	5	5	5	5	5	5	1	5															5	5	5	5	5	5	5	5	5	5
0	4	4	5	5	3	5	4	4	5	4	4	4	3	4	4	4	4	4	4	4	3	4	4	2	4	4	4	4	4	4	4	4	4	4	4	4	5	2	4
0	5	5	5	5	5	5	5	3	5	5	5															5	5	5	5	5	5	1	3	5	1	5	5	1	5	5	5	5	5	4	5	1	4	5	1
0	4	4	3	3	4	3	5	4	3	5	3	3	2	3	2	4	3	2	4	3	2	4	4	1	4															3	3	4	3	4	3	2	4	3	2
0	4	5	4	4	4	5	2	4	4	3	5															4	4	4	4	4	4	3	4	4	3	4	4	2	5	4	3	2	2	4	3	2	2	3	2
0	4	5	5	3	4	5	4	4	5	4	5	5	5	5	4	4	5	2	5	3	1	5	5	1	5	5	5	5	4	5	5	2	4	5	1	5	5	1	5
0	4	4	4	4	4	4	4	3	4	4	4	3	3	3	3	4	3	4	3	3	4	3	3	3	3	4	4	4	4	4	4	2	3	4	3	4	4	2	4
0	5	5	4	5	5	4	5	5	5	5	5															5	5	4	5	5	5	4	5	5	5	5	5	5	4	5	5	4	5	5	5	5	5	5	4
0	4	5	4	4	4	5	2	4	5	2	5	5	4	4	4	4	4	2	4	4	2	4	4	2	4															5	4	3	4	5	4	2	5	4	2
0	3	3	2	5	3	3	2	3	2	2	4															4	3	4	4	4	4	2	4	4	2	4	4	2	4	2	2	2	4	3	2	4	4	2	3
0	4	4	4	4	3	4	3	4	4	4	5															4	4	4	4	4	4	2	4	5	4	5	5	2	5	4	4	4	4	4	4	3	4	4	2
0	4	4	4	5	5	4	5	5	5	5	4	4	3	5	3	4	4	5	5	4	4	5	5	1	5															5	5	4	4	4	5	5	4	5	1
0	4	4	4	5	4	5	4	5	5	4	5	4	5	4	5	3	5	4	4	3	4	5	5	4	5	4	5	5	4	5	5	4	4	4	4	4	4	5	4
0	5	5	4	5	3	5	3	5	5	3	5	5	5	5	5	3	5	2	4	5	2	5	5	1	5	5	5	5	5	5	5	2	4	5	3	5	5	1	5
0	5	5	5	5	5	5	5	5	5	5	5	5	5	5	5	5	5	1	5	5	1	5	5	1	5															5	5	5	5	5	5	5	5	5	5
0	4	4	4	4	4	4	3	4	4	3	4	4	4	4	4	4	4	2	4	4	3	4	4	2	4	4	5	5	5	5	5	2	4	5	2	5	5	1	5
0	5	4	5	1	5	5	5	5	5	4	5	4	3	3	4	4	4	4	4	4	3	3	3	3	2	5	5	3	5	5	5	2	5	5	5	5	5	1	5
0	5	5	5	3	5	5	5	5	5	5	5	5	5	5	3	5	5	1	5	5	1	5	5	1	5	4	2	5	4	5	5	3	5	5	2	5	5	1	5
0	4	4	4	4	4	4	2	4	4	2	4	4	4	3	4	4	4	2	4	3	2	4	4	2	4															4	4	4	4	4	4	2	4	4	2
0	3	3	3	3	3	3	3	3	3	3	3															3	3	3	3	3	3	3	3	3	3	3	3	3	3	3	3	3	3	3	3	3	3	3	3
0	4	4	4	4	4	4	4	4	3	3	4	4	4	4	5	4	4	4	4	4	4	4	5	4	3															3	3	4	5	4	3	4	4	4	3
0	5	5	5	5	5	5	5	3	5	5	5	3	3	3	3	3	3	3	3	3	3	5	5	3	5															3	3	3	3	3	3	3	3	3	3
0	1	3	1	4	2	2	1	2	2	2	2	4	4	2	4	4	2	1	5	3	2	4	4	1	4	4	5	3	5	4	3	4	4	4	4	4	4	1	4
0	5	5	5	2	5	5	5	5	5	5	5															2	5	5	5	5	5	1	5	5	1	5	5	1	5	5	5	5	5	5	5	5	5	5	4
0	4	4	4	4	4	4	4	4	4	4	4	4	4	4	3	3	4	4	4	3	2	4	4	3	3															4	3	3	2	4	4	2	2	2	2
0	4	5	5	5	4	5	4	4	5	4	5	5	3	4	3	4	5	1	4	4	1	5	5	1	5	4	4	5	5	4	5	1	5	5	1	5	5	1	5
0	4	4	4	4	4	4	4	4	4	4	5	4	4	3	4	4	3	4	4	4	4	4	4	4	4															4	4	4	4	4	4	4	4	4	4
0	5	5	5	3	4	5	2	4	5	2	5	5	4	4	4	5	5	5	4	5	1	4	4	1	4	5	5	5	2	4	5	1	4	4	1	5	5	1	5
0	4	5	4	4	5	4	4	4	4	4	4															4	4	4	3	4	4	4	4	5	4	5	5	2	5	4	4	4	4	5	4	5	4	4	4
0	5	5	5	5	5	5	4	5	5	4	5	5	5	5	5	5	5	2	5	5	2	5	5	1	5	5	5	5	5	5	5	2	5	5	2	5	5	1	5
0	4	4	4	5	4	4	2	4	4	2	4	2	5	2	4	3	2	3	4	2	2	4	4	2	4															4	4	3	5	4	4	4	4	4	4
0	5	5	3	1	3	5	3	5	4	2	5	3	4	3	4	3	3	1	4	3	2	3	4	1	3															3	5	3	4	4	3	1	3	3	1
0	5	5	5	4	4	5	2	5	5	2	5	5	5	4	5	4	5	2	4	5	2	5	5	1	5															5	5	5	5	4	5	1	5	5	1
0	5	5	5	5	5	5	4	5	5	1	5	4	4	4	5	5	4	1	5	5	1	5	5	1	5															5	5	4	5	5	3	2	5	3	1
0	1	2	1	2	2	2	5	2	2	4	2															2	2	2	2	2	2	4	2	3	2	4	4	2	4	3	2	3	2	2	3	1	2	2	2
0	4	4	4	4	4	4	4	4	4	4	4	4	5	4	4	5	4	4	4	5	4	4	3	4	4	4	4	4	4	4	4	4	4	4	4	4	4	4	4
0	5	5	5	4	5	5	5	5	5	5	5	4	4	4	4	4	4	5	4	4	4	4	4	1	4															5	5	5	5	4	5	2	4	5	2
0	4	4	4	3	3	5	3	3	4	3	4	4	2	3	2	3	4	2	4	4	2	5	5	1	5															4	2	3	2	3	4	2	3	4	3
0	5	5	5	5	4	5	5	4	5	5	5	4	4	4	4	5	5	1	4	4	1	5	5	1	5															4	4	4	4	4	4	2	4	4	2
0	3	4	2	4	2	4	4	4	4	4	5	3	3	2	3	3	4	2	4	4	2	3	4	2	4	3	4	3	4	3	3	3	4	3	2	4	4	2	4
0	4	4	3	4	3	3	4	3	3	4	3	3	3	3	3	3	3	3	4	3	3	2	3	3	4	5	5	5	4	4	5	4	4	4	4	5	4	1	5
0	4	4	4	4	4	5	5	5	5	4	5	3	3	3	3	3	3	4	3	2	3	4	4	1	4	3	4	3	4	4	4	2	4	4	3	4	4	2	4
0	5	5	4	5	5	5	5	5	5	5	5															5	5	5	5	5	5	4	5	5	3	5	5	1	5	5	5	5	5	5	5	2	5	5	2
0	5	5	5	2	5	5	5	3	5	5	5	5	4	5	4	5	5	1	5	5	1	5	5	1	5	5	4	5	5	2	5	3	2	4	2	5	5	2	4
0	3	4	3	3	3	3	4	3	4	4	4	3	3	3	4	3	4	3	3	4	3	4	4	2	4	4	4	3	4	3	4	2	3	4	2	4	4	2	4
0	5	4	4	4	4	4	4	4	5	5	5	3	3	3	4	4	3	4	4	4	4	4	4	1	4															3	5	4	5	4	4	4	4	4	5
0	2	3	2	4	4	4	4	2	4	4	4	2	2	2	2	4	2	4	4	2	2	2	2	2	2	2	4	2	4	4	4	2	4	4	2	4	4	2	4
0	3	3	3	5	3	4	3	4	3	4	4	2	3	2	3	3	3	2	4	2	3	2	2	4	3															2	3	2	4	3	2	3	3	3	3
0	5	5	4	4	5	5	5	5	5	5	4	5	5	5	3	5	5	1	5	5	1	5	5	1	5	5	5	5	5	5	5	1	5	5	1	5	5	1	5
0	3	3	3	3	4	3	4	3	3	4	3	3	3	3	3	3	3	3	3	3	3	3	3	3	3	3	3	4	3	4	4	3	4	4	3	4	4	3	4
0	2	4	4	4	4	4	4	4	3	4	3	4	4	4	4	4	4	4	4	4	4	4	4	2	4	4	4	4	4	4	4	4	4	4	4	5	5	2	4
0	4	5	3	4	3	4	4	3	4	4	4															3	3	3	3	3	4	2	3	3	2	4	4	2	4	4	3	3	3	3	4	2	3	4	2
0	4	5	5	4	4	5	4	4	5	4	5															4	4	5	4	5	5	4	4	5	2	5	5	2	5	5	5	4	4	4	5	4	4	4	4
0	2	2	1	4	3	2	2	4	3	2	2	2	2	1	2	2	2	2	2	3	2	3	3	2	3															1	1	1	2	5	1	2	4	1	3
0	5	5	5	3	5	5	2	5	5	1	5	4	5	4	5	4	5	3	3	4	4	4	4	5	4															3	3	3	4	5	3	4	3	4	5
0	4	5	4	4	4	4	4	5	5	4	5	3	4	2	4	4	3	2	4	3	2	3	4	1	3	3	4	3	4	4	4	3	4	3	3	5	5	1	5
0	3	4	3	3	3	4	3	4	3	4	4	4	3	2	3	3	3	2	4	3	2	4	4	2	4	3	3	3	4	3	4	2	3	4	2	3	3	3	3
0	4	4	3	3	3	5	5	3	4	5	4	3	3	2	3	3	3	3	3	3	3	4	4	2	4															2	4	4	4	3	4	2	4	4	2
0	4	4	3	3	3	3	3	3	3	3	3															3	3	3	3	3	3	3	3	3	2	4	4	2	4	3	2	3	3	3	2	2	2	2	3
0	5	4	4	3	4	4	4	4	4	4	4															4	4	3	4	4	5	4	4	4	2	5	5	1	5	5	5	4	5	5	5	3	4	4	3
0	4	5	4	4	3	3	3	5	4	3	5	4	4	4	5	4	4	3	4	4	3	4	4	4	3															3	4	4	3	3	4	5	4	3	3
0	4	4	4	4	4	4	4	4	4	4	4	3	4	4	3	4	4	2	4	4	4	5	5	1	5	3	4	4	4	4	4	4	4	4	4	4	4	2	4
0	4	5	4	5	4	4	4	4	4	4	4															4	4	5	5	4	5	4	4	5	2	5	5	1	5	4	4	4	4	4	4	2	4	4	2
0	5	5	5	5	4	5	1	5	5	5	5															5	5	5	1	4	5	1	5	5	1	5	5	1	5	5	5	5	1	5	5	1	5	5	1
0	3	4	3	4	3	4	3	3	4	4	4	5	5	5	5	5	5	5	5	5	5	5	5	5	5	3	3	4	4	3	4	4	3	5	3	5	4	2	5
0	2	2	2	4	2	2	2	2	2	2	2															3	3	3	3	3	3	3	3	3	3	4	4	2	4	2	2	2	2	2	2	2	2	2	2
0	2	4	2	2	2	4	4	4	4	4	5	1	2	1	2	1	2	1	1	1	2	4	3	2	2	4	4	2	4	3	4	5	2	2	5	4	5	1	5
0	4	4	3	3	3	4	3	4	4	4	4	2	2	1	1	2	3	3	2	3	3	4	4	2	4	3	3	3	3	3	3	3	3	3	3	3	3	3	3
0	5	4	3	4	4	5	5	5	5	5	5	5	5	5	4	5	5	5	5	5	4	4	4	5	5	3	4	3	4	3	4	5	4	4	4	4	4	3	4
0	3	4	4	2	2	4	5	3	4	5	5															5	5	5	5	2	5	5	4	5	2	5	5	2	5	2	2	4	4	2	4	2	2	4	2
0	4	5	4	4	4	4	4	4	4	5	4	3	4	3	4	3	3	4	4	3	3	3	3	3	3															4	3	3	3	3	3	3	3	3	3
0	3	3	3	5	3	3	2	3	4	2	3	3	3	2	3	3	3	3	3	3	3	3	3	3	3															3	3	2	3	3	2	3	3	2	2
0	5	4	3	5	3	5	3	4	4	3	5	3	4	3	4	3	4	3	4	4	3	4	5	2	5															4	5	3	3	4	5	3	5	4	2
0	5	5	5	4	5	5	5	5	5	5	4	5	4	5	2	5	5	5	5	4	1	5	5	1	5	5	4	5	5	5	5	4	5	5	4	5	5	1	5
0	4	5	3	4	4	5	5	5	4	5	5															4	4	3	4	3	4	4	5	4	2	5	5	1	5	4	5	3	4	4	4	2	4	3	2
0	4	5	4	5	3	5	5	5	5	5	5	5	5	4	3	4	4	2	4	5	1	5	4	1	5	4	4	5	5	5	5	3	5	5	3	5	5	1	5
0	3	3	3	3	3	3	4	4	4	3	3															5	4	4	5	4	5	4	4	4	3	5	4	4	4	5	4	3	4	4	4	3	3	4	3
0	5	5	4	5	5	5	5	4	5	5	5															5	5	4	5	5	5	3	5	5	2	5	5	1	5	5	5	3	5	4	4	2	4	3	2
0	4	4	4	2	4	4	4	4	4	4	5	4	4	4	4	3	4	2	4	4	4	3	4	2	4	3	4	4	4	3	4	3	3	4	2	4	4	1	4
0	3	4	2	4	4	4	3	4	4	3	4	4	4	2	4	4	4	2	4	4	2	4	4	2	4															3	4	2	4	4	3	2	4	3	2
0	3	2	2	2	4	2	4	4	3	2	3	2	2	1	2	4	1	3	4	2	2	2	2	3	2															2	3	3	2	4	4	2	4	4	3
0	3	4	2	4	3	3	4	3	4	4	3	3	4	4	5	2	2	3	3	3	3	3	4	3	5	4	4	3	3	3	4	3	3	5	4	5	4	4	3
0	4	4	4	1	4	4	4	4	4	2	5	2	2	2	4	2	2	2	2	2	2	2	2	2	3															4	4	3	1	4	5	1	3	3	1
0	5	5	5	5	5	5	5	5	5	5	5															5	5	5	1	5	5	5	5	5	1	5	5	1	5	5	5	5	5	5	5	1	5	5	1
0	3	2	3	2	2	3	4	2	2	4	3	3	2	3	2	2	3	3	2	3	2	3	4	2	3															2	3	2	2	2	3	2	2	2	3
0	5	5	5	4	3	5	5	3	5	5	5															5	5	5	1	3	5	1	3	5	1	5	5	1	5	5	5	5	5	3	5	5	3	5	4
0	5	5	5	4	5	5	4	4	5	4	5															4	5	4	5	4	5	2	4	4	2	5	5	1	5	4	4	2	4	4	3	2	5	4	2
0	4	4	4	3	4	4	2	4	4	2	4	4	2	4	3	4	4	2	4	4	2	4	4	1	4															4	2	4	3	4	4	2	4	4	2
0	5	5	5	5	3	5	5	5	5	5	5	5	5	4	5	5	4	1	4	5	5	5	4	1	5															3	5	5	5	5	5	1	4	5	1
0	4	5	3	4	4	4	3	4	4	3	5	2	2	2	3	4	3	2	4	3	2	4	4	1	4	3	3	2	3	4	4	2	4	3	2	5	5	1	5
0	5	5	4	3	4	5	3	5	5	3	5	5	4	3	5	5	4	1	5	5	1	5	5	1	5															5	5	2	5	5	4	1	5	4	1
0	4	5	4	5	4	4	5	4	4	5	5	3	3	3	3	3	3	3	3	3	3	3	3	3	3	5	5	5	5	5	5	1	5	5	1	5	5	1	5
0	5	4	4	2	4	5	4	4	4	4	5	4	4	4	5	4	4	2	4	4	2	4	4	2	4	4	4	4	4	4	4	2	4	4	2	4	5	1	4
0	3	3	3	3	3	3	3	3	3	3	3															3	3	3	3	3	3	3	3	3	3	4	4	2	4	3	3	3	3	3	3	3	3	3	3
0	5	5	5	3	5	5	4	5	5	5	4	4	4	4	4	4	2	4	3	4	4	4	4	4	4															3	2	3	2	2	3	4	3	3	2
0	5	5	5	4	5	5	1	5	5	1	5	5	5	5	5	5	5	1	5	5	1	5	5	1	5	5	5	5	1	5	5	1	5	5	1	5	5	1	5
0	3	3	3	4	3	4	4	4	4	4	4	5	4	3	5	3	5	4	5	4	3	5	5	2	5	4	4	3	4	4	4	3	4	4	4	5	5	2	5
0	5	5	5	5	5	5	5	5	5	5	5	3	2	4	3	5	4	1	4	2	4	5	5	1	5	3	5	5	5	5	4	4	4	4	4	5	5	1	5
0	4	4	4	2	4	4	5	5	4	4	4															4	4	4	3	5	4	4	4	4	4	5	5	1	5	4	3	4	2	4	3	3	4	4	3
0	5	5	5	5	5	4	5	5	5	5	5															5	5	4	5	5	4	4	5	4	4	5	5	4	5	5	5	5	5	5	4	4	5	4	4
0	2	4	4	4	3	4	4	4	4	4	5															2	4	4	4	4	4	2	4	4	2	4	4	2	5	2	4	4	4	2	5	2	4	4	2
0	3	3	3	3	3	3	3	3	3	3	4															3	3	3	4	3	3	3	3	4	3	3	3	3	3	3	3	3	3	3	3	3	3	3	3
0	5	5	5	5	3	5	5	3	5	5	5	5	5	5	1	5	5	1	1	5	1	5	5	1	5															5	5	5	1	4	5	1	4	5	1
0	4	4	4	3	4	4	4	4	4	4	4															4	4	4	4	4	4	2	4	4	2	4	4	2	4	4	4	4	3	4	4	4	4	4	2
0	4	4	4	4	4	4	5	4	4	5	4	2	3	1	2	2	2	4	2	2	2	2	2	5	2	4	4	4	4	4	4	2	4	4	2	5	5	1	5
0	4	4	4	4	4	5	5	5	5	5	4															5	5	5	5	5	5	4	4	5	2	5	5	1	5	5	5	5	5	5	5	2	5	5	2
0	5	4	5	5	5	5	2	4	4	3	5	5	4	5	4	5	5	2	5	5	2	5	4	2	5	5	5	5	4	5	5	2	5	5	2	5	5	2	5
0	4	4	3	4	4	4	4	4	4	4	4															4	4	3	4	4	4	2	4	4	4	4	4	2	4	4	4	3	4	4	4	2	4	4	2
0	3	4	3	3	3	4	4	3	4	4	4	4	3	3	3	4	4	2	4	3	4	5	5	1	5	3	3	4	3	3	4	2	4	4	2	5	5	5	5
0	4	4	4	5	4	4	4	4	4	4	5	3	3	3	3	4	4	3	4	3	2	4	4	2	4	4	4	3	4	3	4	2	4	4	3	4	4	2	4
0	4	4	4	4	4	4	4	4	4	4	4	3	4	2	4	4	3	2	4	3	2	4	4	2	4	4	4	4	4	4	4	4	4	4	4	5	5	1	5
0	4	4	4	4	4	4	4	4	4	4	4															5	4	4	4	4	4	2	4	5	2	5	5	1	5	4	5	4	4	4	5	2	4	5	2
0	2	2	1	2	4	2	2	1	1	2	2	1	1	1	1	4	1	1	4	1	1	1	1	3	1															4	3	1	1	4	1	1	4	1	2
0	4	4	4	3	4	4	2	4	4	2	4															4	5	5	4	5	5	2	4	4	2	5	5	2	5	5	4	4	3	4	4	2	4	5	2
0	4	4	4	2	4	5	3	3	5	2	4															4	4	4	5	4	4	2	4	4	2	5	5	2	5	5	5	4	4	5	5	2	4	5	2
0	3	5	3	3	3	4	2	5	3	2	5															4	4	3	3	3	4	1	4	4	1	5	5	1	5	3	3	3	3	3	3	1	3	3	1
0	5	5	5	5	3	5	4	5	5	4	5	4	4	4	5	4	5	2	5	4	2	5	4	2	4															5	5	4	5	3	5	2	3	3	2
0	5	5	5	3	5	5	5	4	5	5	5	5	4	5	2	5	5	2	4	5	1	4	5	2	5	5	5	5	2	5	5	1	5	5	1	5	5	1	5
0	5	5	5	3	5	5	5	5	5	5	5	3	3	4	3	3	4	4	4	3	4	5	4	1	5															5	5	3	5	5	5	5	5	5	3
0	4	4	4	3	4	4	5	4	4	5	4	4	4	4	4	4	4	4	4	4	4	4	4	4	4	4	5	4	5	4	4	3	4	4	4	4	5	2	5
0	5	5	4	4	4	5	2	4	5	3	5	3	4	3	4	3	5	4	4	3	1	4	4	2	4	5	2	5	2	5	5	1	4	5	1	5	5	1	5
0	4	4	4	4	4	4	4	4	4	2	4	4	4	4	2	4	4	2	4	4	2	4	4	2	4	5	4	5	4	4	4	2	4	5	2	5	5	2	5
0	3	3	1	1	1	1	1	1	1	3	5	1	1	3	1	1	1	1	1	1	1	1	1	1	1	3	4	3	3	5	3	3	3	3	3	3	3	3	3
0	4	4	5	3	4	5	4	4	5	4	5	5	3	4	3	5	5	1	5	5	1	5	5	1	5															5	4	4	3	4	4	2	4	4	2
0	3	4	3	3	3	3	5	4	4	4	4															3	4	3	3	3	3	2	4	3	2	5	5	1	5	3	3	3	3	3	3	3	3	3	3
0	4	5	1	3	3	3	3	3	3	2	4															5	4	2	3	3	2	3	3	3	3	2	3	4	2	4	3	2	3	3	3	4	2	3	3
0	1	4	2	4	2	1	4	5	5	4	4															1	5	4	1	4	5	4	5	5	4	5	5	5	5	5	4	1	1	4	4	5	1	5	5
0	3	2	2	2	4	4	2	4	2	3	2	1	1	1	1	5	1	1	5	1	1	1	1	5	1	2	2	2	2	3	3	2	3	4	2	3	3	2	4
0	5	5	5	5	5	5	1	4	5	1	5	4	4	4	4	4	4	2	4	5	1	5	5	1	5	4	5	4	4	5	4	1	4	4	2	5	5	1	5
0	2	5	5	5	5	5	5	2	5	5	5	5	5	5	5	5	5	2	5	5	1	5	5	1	5															5	5	4	5	5	5	1	5	5	1
0	5	4	4	3	4	4	3	4	5	5	4															5	3	3	3	5	4	5	4	4	4	4	5	2	5	4	4	2	4	4	4	4	3	4	4
0	5	5	5	3	5	5	3	5	5	4	5	5	5	5	4	5	5	2	5	5	2	5	5	1	5															3	5	2	5	5	5	3	5	5	2
0	3	2	3	2	5	2	2	4	4	3	4															4	5	2	1	1	4	3	3	3	2	2	3	4	4	2	3	3	2	5	2	3	5	3	5
0	4	5	4	5	5	5	4	4	4	5	5															4	5	5	4	4	3	5	3	4	4	4	5	4	5	3	5	4	4	4	5	4	5	5	4
0	3	3	3	5	3	4	5	3	3	4	2															4	5	4	5	3	5	2	4	5	2	5	5	1	5	4	5	3	5	3	4	2	4	5	2
0	4	5	3	4	3	4	5	4	5	5	5	4	4	4	3	4	3	4	4	4	3	4	4	2	4															4	5	3	2	2	3	3	2	3	2
0	4	5	4	5	3	5	5	4	4	4	5	3	4	4	3	3	4	2	4	3	2	3	4	2	5															4	5	4	5	3	4	3	4	4	2
0	4	4	2	4	4	4	5	4	4	4	4	2	2	2	4	4	2	2	3	2	2	3	3	2	3															2	5	2	4	4	2	2	4	3	2
0	4	4	4	2	3	4	4	3	4	5	4															4	5	4	5	4	4	4	5	4	4	5	5	1	5	4	5	4	4	3	4	2	3	4	2
0	3	4	3	3	3	3	3	3	3	2	4															4	4	3	3	3	3	3	3	4	3	4	4	2	4	3	3	3	4	3	3	2	3	2	3
0	5	5	5	3	4	5	4	4	5	4	5	4	4	4	4	4	5	2	4	4	1	5	5	1	5	4	5	5	5	5	5	2	5	5	1	5	5	1	5
0	3	4	4	4	3	4	2	4	4	2	5	4	4	3	4	4	4	2	4	4	2	5	4	1	5	4	4	4	4	4	4	2	4	4	2	4	4	2	4
0	3	4	4	4	4	4	4	4	4	4	4	2	2	2	3	4	3	4	4	2	4	3	3	2	3	4	4	4	4	4	4	2	4	4	2	4	4	2	4
0	4	5	5	5	4	5	4	4	5	4	4															5	5	5	5	4	5	5	4	5	2	5	5	1	5	4	5	3	5	4	4	2	4	4	2
0	4	4	5	4	4	5	4	4	5	4	5	4	4	4	4	4	4	2	4	4	2	5	5	1	5	4	4	4	4	4	4	3	5	4	4	5	5	1	5
0	4	4	4	4	4	4	2	4	4	2	4	4	4	4	4	4	4	2	4	4	2	4	4	2	4															4	4	4	4	4	4	2	4	4	2
0	4	5	4	4	4	5	4	4	5	4	5	4	2	4	2	4	4	1	4	4	1	5	5	1	4	5	5	5	4	4	5	1	4	5	1	5	5	1	5
0	4	5	2	4	3	3	4	3	2	4	4	2	2	2	2	2	2	3	4	2	4	3	3	3	3	4	3	4	2	4	4	3	4	4	3	4	4	4	4
0	4	4	4	4	5	4	5	5	4	4	4	5	5	4	3	5	5	1	5	4	1	5	5	1	5	4	1	5	4	5	5	1	5	5	1	5	5	1	5
0	4	4	3	4	4	3	4	4	4	3	4															4	4	4	4	4	4	4	4	4	4	4	4	4	4	4	4	4	4	4	4	4	4	4	4
0	4	4	4	2	4	4	2	3	4	2	4															4	4	4	4	4	4	2	4	4	2	4	4	2	4	4	4	4	4	4	4	2	4	4	2
0	3	4	3	4	4	4	5	4	4	4	4															2	4	4	5	4	4	4	4	4	4	4	5	1	4	3	4	3	4	4	4	4	4	3	4
0	3	3	3	3	3	4	3	3	4	3	4	3	3	3	3	3	3	3	3	3	3	4	4	3	4	4	3	3	3	3	4	2	3	4	1	4	5	1	4
0	3	2	2	4	2	3	2	4	2	3	2	1	2	2	2	2	2	3	4	2	2	2	2	3	2	2	4	3	4	4	4	2	4	4	2	4	4	2	4
0	4	4	4	4	4	4	4	4	4	2	4	4	2	4	2	4	4	4	4	4	2	4	4	2	4	4	2	4	2	4	4	2	4	4	4	4	4	2	4
0	3	3	2	3	3	3	4	2	3	4	3	2	3	2	2	3	3	3	3	2	3	3	3	3	2	3	2	2	4	3	4	3	3	3	3	3	2	2	3
0	5	5	4	2	4	4	5	4	4	5	5	4	5	4	4	4	4	4	4	4	2	5	5	1	5	5	5	5	2	5	5	2	5	5	2	5	5	1	5
0	4	4	3	4	3	4	3	3	4	4	4	4	3	3	3	3	3	2	3	3	2	4	4	2	4															4	4	3	4	3	4	2	3	3	2
0	3	4	3	5	2	4	4	3	3	2	3	2	2	1	2	2	2	3	2	2	3	2	2	3	2	3	3	4	4	2	4	3	2	4	3	4	4	2	4
0	2	5	1	5	5	2	5	5	1	5	1															5	5	5	5	5	5	2	5	5	2	5	5	1	5	5	5	2	5	5	5	5	5	5	5
0	5	5	5	4	5	4	4	5	5	4	5	4	4	4	2	4	5	1	4	4	1	5	5	1	5															5	5	5	5	5	5	1	4	5	1
0	3	4	3	3	4	4	2	4	4	2	4	4	3	4	3	4	4	2	4	4	2	4	4	2	4	4	5	3	5	4	5	3	4	5	3	5	5	1	5
0	4	4	3	2	3	4	4	3	4	4	4	3	3	3	3	3	3	2	3	3	2	4	4	1	4															3	3	3	4	3	4	2	3	3	2
0	4	4	4	3	4	4	3	4	4	3	4	4	5	4	4	4	4	5	3	4	4	3	4	5	4	4	4	3	4	5	4	4	4	3	4	3	4	3	4
0	3	2	2	3	2	3	5	2	3	4	3	1	2	1	1	3	1	4	4	1	5	2	2	5	1															3	3	3	3	3	3	3	3	3	3
0	4	4	4	4	4	4	4	4	4	4	4	5	4	5	4	4	5	2	4	5	5	5	5	1	5															4	4	4	4	4	4	2	4	4	2
0	4	4	4	4	4	4	4	4	4	4	4															4	4	4	4	4	4	1	4	4	2	4	4	2	4	4	4	3	4	4	4	2	4	4	2
0	4	4	4	4	4	4	3	4	4	3	3															4	4	4	4	4	4	2	4	5	2	3	5	1	4	4	4	3	4	4	4	3	4	4	2
0	4	4	4	4	5	4	4	5	4	4	4															4	4	3	4	4	4	5	4	4	5	4	4	2	4	4	4	4	4	5	5	4	5	4	4
0	5	5	5	5	5	5	5	5	5	1	5	5	3	5	3	5	5	1	5	5	1	5	5	1	5	5	3	5	3	5	5	1	5	5	1	5	5	1	5
0	4	5	4	5	4	4	5	4	4	2	4	2	4	2	2	4	4	4	5	2	4	4	4	2	4	4	5	3	5	4	4	4	4	4	4	5	5	2	5
0	5	5	5	4	5	5	5	4	5	5	5															5	1	5	1	5	5	2	5	5	1	5	5	1	5	5	1	5	1	5	5	1	5	5	1
0	4	5	4	5	4	4	4	5	4	3	5	3	5	3	4	4	4	4	4	4	2	4	4	2	4															4	4	3	4	4	3	3	4	4	2
0	3	4	4	4	3	4	4	2	4	4	4	3	4	3	4	3	4	3	2	4	2	4	4	2	4	4	4	3	4	4	4	2	4	4	2	4	4	2	4
0	4	4	4	4	4	4	3	4	4	4	5															4	4	4	4	4	4	2	4	4	2	5	5	1	5	4	5	4	4	4	4	3	4	4	2
0	3	5	4	5	3	4	2	4	4	2	5															3	3	3	3	3	3	2	3	3	3	4	4	1	4	3	4	3	4	3	3	2	4	3	2
0	3	3	3	4	4	3	4	3	4	4	3	4	4	3	3	5	3	3	4	3	4	3	3	4	4															3	4	3	4	4	3	4	4	3	4
0	4	4	4	4	4	4	4	4	4	4	4	4	4	4	4	4	4	4	4	4	4	4	4	4	4	4	4	4	4	3	4	3	4	4	4	4	4	4	4
0	3	1	5	2	2	3	3	3	1	1	3															3	5	4	3	3	2	5	3	3	2	4	3	3	5	4	3	5	4	3	5	3	3	3	1
0	4	4	4	4	4	4	3	4	4	3	4															4	4	4	4	4	4	3	4	4	3	4	4	2	4	4	3	4	3	4	4	3	4	4	3
0	5	5	4	5	5	5	4	5	5	5	5	3	3	3	3	3	3	2	5	3	4	3	3	3	3	5	5	5	5	5	5	1	5	5	1	5	5	1	5
0	4	4	4	4	3	4	4	3	4	4	4	3	4	2	4	3	2	2	3	2	2	4	4	2	4	4	4	4	4	3	4	2	3	4	2	5	5	1	5
0	3	4	3	5	3	5	4	3	4	3	5	4	4	3	5	3	4	2	3	4	2	4	4	2	4	5	4	4	3	3	5	2	4	5	2	5	5	1	5
0	4	4	4	3	4	4	4	4	4	4	4															4	4	4	4	4	4	4	4	4	4	4	4	2	4	4	4	5	4	4	5	2	4	5	3
0	5	5	3	5	2	5	1	2	5	1	5	5	5	3	3	3	5	1	3	3	1	5	5	5	5															5	5	5	1	4	5	1	3	5	1
0	3	2	2	3	2	2	3	4	3	2	2	2	2	2	1	2	4	2	3	4	2	3	4	2	2															1	1	3	1	4	1	1	1	1	1
0	4	2	2	2	4	2	2	2	4	2	4	2	4	2	2	2	2	4	4	2	2	2	2	2	2	2	2	2	2	2	2	2	2	2	2	2	2	2	2
0	4	4	4	2	4	4	4	4	4	4	4															4	4	4	4	4	4	4	4	4	3	4	4	2	4	4	4	3	4	4	4	2	4	3	2
0	4	4	3	4	3	4	4	4	4	4	4	4	4	4	3	4	4	4	4	4	3	4	4	2	4	4	4	4	4	4	4	3	4	4	2	5	4	2	4
0	4	3	4	3	3	3	4	3	4	4	4	3	4	3	2	3	3	3	3	3	4	3	3	3	3	5	5	5	5	3	5	4	5	5	5	5	5	1	5
0	3	3	4	3	3	3	3	4	3	4	4	3	4	3	4	4	4	3	4	4	4	3	4	3	3	4	3	4	4	4	4	4	3	4	4	5	4	4	4
0	4	4	3	4	3	5	3	4	4	4	4	4	4	3	4	3	4	2	4	4	2	5	5	1	5	4	5	4	4	3	4	2	4	4	2	4	5	1	5
0	5	5	5	4	4	4	5	4	4	5	4	5	4	5	5	4	4	4	5	5	4	5	4	4	5	4	4	5	5	5	4	5	5	4	4	5	4	4	5
0	3	3	3	5	2	3	4	3	3	5	3	3	3	3	3	3	3	3	3	3	3	3	3	3	3	3	3	3	3	3	5	4	3	5	3	4	4	3	5
0	4	5	5	5	5	5	4	4	5	5	4	5	5	5	4	5	4	4	4	4	5	4	4	5	5	5	5	4	4	5	4	4	4	5	5	5	4	5	4
0	4	3	4	5	5	4	4	5	5	4	5															5	5	4	4	4	5	4	4	4	4	5	5	4	4	5	5	4	5	5	4	5	4	4	4
0	5	4	5	4	5	4	5	5	4	5	5															4	3	5	5	5	4	4	5	5	5	4	5	4	5	4	5	4	5	4	4	5	4	5	4
0	5	5	5	5	5	5	2	5	5	2	5															5	5	5	5	5	5	2	5	5	2	5	5	2	5	5	2	5	2	5	5	2	5	5	2
0	5	5	5	5	5	5	5	5	5	5	5	5	5	5	5	5	5	1	5	5	1	5	5	1	5	5	5	5	5	5	5	1	5	5	1	5	5	5	5
0	5	5	4	5	4	4	4	4	4	4	4	3	4	3	3	4	4	2	4	4	2	4	4	2	4	3	4	2	4	4	4	3	4	4	2	4	4	2	4
0	5	5	5	2	5	5	5	4	5	4	5															4	5	4	4	4	4	4	4	4	4	5	5	2	5	4	5	4	5	5	3	4	4	4	3
0	5	5	4	4	4	5	5	4	5	4	5															4	5	5	5	4	5	1	5	5	1	5	5	1	5	4	5	4	5	5	5	1	5	5	2
0	4	3	3	5	2	5	3	4	3	4	5	4	4	5	5	5	4	3	5	5	2	5	5	3	4															4	3	5	4	5	3	4	5	4	4
0	4	2	1	1	1	2	4	1	2	4	4	1	1	1	1	1	1	1	1	1	1	2	2	2	2	4	2	1	1	1	4	1	1	5	1	4	4	4	4
0	4	4	4	4	4	4	2	4	4	2	4	4	3	3	4	4	4	2	4	4	2	4	4	2	4															4	4	4	4	4	4	2	4	4	2
0	3	3	3	3	3	3	4	3	3	3	3	2	2	2	2	2	2	2	2	2	3	3	3	2	3	4	4	4	4	3	4	4	3	4	4	4	4	4	4
0	3	5	3	3	3	3	3	3	3	3	3	3	5	3	3	3	4	3	3	3	3	3	3	2	3	3	3	3	3	3	3	3	3	3	3	4	3	3	3
0	5	5	5	3	5	5	3	5	5	5	5															5	4	5	5	5	5	2	5	5	2	5	5	1	1	5	5	5	5	5	5	1	5	5	1
0	4	5	5	4	4	5	2	4	5	2	5															4	4	5	4	4	5	1	4	4	1	5	5	1	5	3	5	3	4	2	1	4	3	2	4
0	3	3	3	3	3	3	3	3	3	3	2	3	3	3	3	3	3	3	3	3	3	3	3	3	3															3	3	3	3	3	3	3	3	3	3
0	4	3	3	3	3	4	3	4	3	3	4	3	3	3	3	4	4	3	3	3	4	4	3	3	3															4	3	3	3	3	4	3	3	3	3
0	5	5	4	4	3	4	4	4	4	4	5	4	4	4	4	3	4	3	4	4	3	4	4	1	4															4	3	4	3	3	4	4	4	4	4
0	4	4	4	3	4	4	3	4	4	3	4	3	3	4	3	4	4	2	4	4	2	4	4	2	4															3	3	4	3	4	4	2	4	4	2
0	5	5	5	3	3	5	4	5	5	4	5	4	4	4	4	4	5	2	4	5	2	1	1	1	1	4	5	5	5	4	5	2	4	5	1	5	5	1	5
0	2	2	2	2	2	2	4	2	4	4	2															2	2	2	2	2	2	4	2	3	4	4	4	2	4	4	4	2	4	3	3	4	2	2	3
0	5	5	5	4	4	4	5	4	4	5	5	4	4	3	4	4	4	4	4	4	4	4	4	1	4	4	4	4	4	4	4	4	4	5	2	5	5	1	5
0	4	4	5	3	5	5	4	5	5	4	4															5	5	5	5	5	5	2	5	5	2	5	5	1	5	4	5	5	1	5	5	2	5	4	1
0	5	5	5	3	5	5	4	4	5	4	5	4	5	5	3	4	5	1	3	5	2	5	5	1	5															5	5	5	3	3	5	1	3	5	1
0	4	3	4	2	4	2	3	3	2	3	3	3	2	3	2	3	3	3	4	2	4	3	3	4	2	3	2	3	4	3	4	3	2	3	2	3	4	3	2
0	4	5	4	3	4	5	4	4	4	4	5	3	3	4	4	3	4	2	4	4	3	4	5	1	4	2	5	5	5	4	5	2	4	5	3	5	5	1	5
0	5	5	5	5	5	5	4	5	5	5	5	4	5	5	5	5	5	5	5	5	5	5	5	1	5	5	5	5	5	5	5	2	5	5	5	4	5	1	5
0	4	4	4	4	4	4	4	4	4	4	5	4	4	4	4	4	4	2	4	4	2	4	4	2	4	4	4	4	4	4	4	2	4	4	2	4	4	2	4
0	4	4	3	4	4	4	3	4	4	4	4	3	3	3	3	3	4	2	3	3	3	4	4	2	4															4	4	3	4	4	4	2	4	4	2
0	3	4	3	3	3	4	3	1	4	2	4															3	4	3	4	3	4	2	3	4	2	4	4	2	4	3	4	3	4	3	3	2	3	4	3
0	5	5	3	2	4	5	5	4	5	5	5	2	2	2	2	4	3	5	4	3	1	3	3	1	3	4	3	4	3	4	4	4	4	4	3	5	5	1	5
0	4	4	3	3	3	4	4	4	4	3	4	4	4	3	4	3	4	3	4	4	2	4	4	2	4															3	4	3	3	3	4	4	3	4	2
0	1	5	3	5	1	4	4	3	5	1	1	4	5	1	4	4	3	1	5	5	5	5	4	4	3	1	4	1	5	5	4	4	4	1	5	5	4	5	3
0	5	5	4	4	4	4	2	5	5	2	5	4	2	4	5	4	4	2	4	5	2	5	5	1	5															5	2	5	5	5	5	5	5	5	1
0	4	3	4	4	4	4	3	4	4	4	4	4	3	4	3	4	4	2	4	4	2	4	4	2	4															4	4	4	2	4	4	4	4	4	2
0	5	5	5	4	5	5	5	5	5	5	5	5	5	5	5	5	5	5	5	5	5	5	5	1	5															5	3	3	5	5	5	2	5	5	2
0	5	5	4	5	3	4	1	5	5	1	5	2	3	3	3	3	3	2	3	2	3	3	3	3	3	5	5	5	3	3	5	5	5	5	4	5	5	1	5
0	4	4	4	3	3	4	3	3	4	4	5	3	3	3	4	3	3	3	3	3	2	4	4	2	4															5	3	4	3	3	4	2	3	4	2
0	3	5	3	2	4	4	4	4	3	3	5	4	3	3	2	4	5	2	4	5	2	5	5	1	5															4	4	3	4	4	3	2	4	4	2
0	5	5	5	5	4	5	1	4	5	1	5	3	4	3	4	2	3	2	3	3	2	3	3	2	4	4	4	4	5	4	4	1	4	5	2	5	5	1	5
0	3	3	4	3	4	4	2	3	2	3	3	3	3	4	4	4	4	3	4	4	3	2	3	2	2															3	3	3	3	3	3	4	3	3	4
0	5	5	5	5	4	5	4	4	5	3	5															5	5	5	5	4	5	1	5	5	1	5	5	1	5	5	5	5	5	5	5	1	5	5	1
0	4	2	4	4	4	4	4	4	4	2	4	4	4	3	2	4	3	2	4	4	2	4	4	2	4															4	3	3	2	2	3	2	2	3	2
0	4	4	5	5	5	4	4	5	3	1	5															4	4	4	1	5	5	4	4	5	1	4	4	4	4	4	3	3	3	4	3	3	2	3	3
0	4	4	4	4	4	4	4	4	4	4	4	4	4	4	4	4	4	4	4	4	4	4	4	1	4															4	4	4	4	4	4	2	4	4	4
0	5	4	4	4	4	4	4	3	5	4	4															4	4	4	2	3	4	3	3	4	4	4	5	2	4	4	5	3	3	3	5	3	3	4	2
0	4	3	3	4	3	4	2	3	4	3	4															3	4	3	5	3	5	2	3	3	2	5	5	1	5	3	3	3	4	3	3	3	3	3	3
0	3	3	3	5	4	3	4	4	3	4	2															4	3	4	3	4	4	2	4	4	2	4	4	2	4	4	4	4	4	4	4	2	4	4	2
0	5	5	3	4	4	4	5	4	4	4	4															4	5	4	5	4	3	5	4	4	4	4	4	1	4	4	5	3	5	4	2	2	4	2	2
0	5	5	5	5	5	5	5	5	5	4	5															5	5	5	5	5	5	1	5	5	1	5	5	1	5	5	5	5	5	5	5	1	5	5	2
0	5	5	5	5	5	5	5	5	5	5	5	5	5	5	5	5	5	5	5	5	5	5	5	5	5															5	4	5	4	5	4	5	4	5	4
0	4	4	4	2	4	4	4	4	4	4	4	4	4	4	4	4	4	2	4	4	2	4	4	2	4	4	4	4	4	4	4	2	4	4	2	4	4	2	4
0	2	3	2	4	4	3	5	4	3	4	3	2	3	2	2	3	2	3	3	2	4	3	2	3	2	2	2	2	2	4	2	5	3	2	4	2	3	3	3
0	5	5	4	4	5	5	5	5	5	4	5	3	4	4	3	4	4	4	4	4	4	4	4	1	4	4	5	4	5	4	5	4	4	5	4	5	5	1	5
0	3	4	3	5	4	3	5	4	4	5	4															2	4	3	4	3	4	4	4	4	4	5	5	1	5	2	4	2	4	3	4	4	3	3	4
0	2	2	2	4	2	3	4	2	3	4	2															4	4	3	4	4	3	2	4	3	2	4	4	2	4	3	4	3	3	2	4	2	2	2	2
0	3	4	3	3	4	4	5	4	4	5	4															3	4	3	3	4	4	2	4	4	4	4	4	2	4	3	4	3	3	4	3	3	4	3	3
0	4	5	4	4	5	4	5	4	4	5	5	4	4	5	5	4	4	5	5	4	2	5	4	1	4	5	3	4	4	4	4	4	4	4	2	4	5	2	4
0	3	4	3	3	3	4	3	3	3	3	3	1	3	3	3	2	3	3	3	2	3	3	4	3	4															3	3	3	3	3	3	3	3	3	3
0	5	5	5	5	3	5	5	4	2	5	5	5	3	4	3	2	3	3	2	3	4	4	5	1	3	5	1	5	4	4	5	5	3	5	3	5	5	1	5
0	4	5	4	4	4	4	4	3	4	4	4	4	4	4	4	4	4	2	4	4	2	4	4	1	4	4	4	4	4	4	4	2	4	4	4	4	4	1	4
0	3	2	3	4	3	4	4	3	3	4	3	4	2	3	2	4	4	2	3	4	2	4	4	2	4															4	4	3	4	3	4	4	3	4	2
0	4	4	4	4	3	4	2	4	4	2	4															4	4	4	2	4	4	2	4	4	4	4	4	2	4	4	4	4	4	4	4	2	4	4	2
0	3	3	2	5	2	4	3	2	3	2	3	2	2	2	2	2	2	2	3	2	2	2	2	2	2	3	2	4	2	3	4	2	2	4	1	4	4	2	4
0	2	3	2	3	2	3	4	3	2	2	2															3	2	3	3	2	2	4	2	2	2	3	3	3	2	2	2	3	2	4	3	3	2	2	4
0	4	3	3	3	3	3	4	3	3	5	3															4	3	3	4	4	4	2	4	4	2	4	4	2	4	3	3	3	3	3	2	3	3	3	3
0	4	4	3	3	4	4	4	4	4	4	4	3	3	3	3	4	4	2	3	3	2	3	4	2	4	4	4	4	4	4	4	2	3	4	2	5	5	1	5
0	3	4	2	2	3	4	2	4	3	2	4	3	2	2	1	4	3	2	4	3	2	4	4	1	4	3	2	3	4	4	4	1	4	3	2	5	5	1	5
0	3	3	2	3	2	2	2	3	3	2	4	3	3	2	2	2	4	3	2	3	3	2	2	2	3															2	2	2	2	2	2	2	3	2	3
0	4	4	2	3	2	4	4	4	4	4	4															4	4	4	4	2	4	2	4	4	2	4	4	2	4	4	3	2	4	3	2	4	2	4	4
0	4	5	4	4	4	5	3	4	4	4	5	4	4	4	4	4	4	3	4	4	2	4	4	2	4	4	2	4	2	4	5	2	4	5	2	5	5	1	5
0	4	4	2	4	4	3	5	4	3	5	3	2	4	2	4	4	2	4	4	2	2	3	3	3	3	4	4	4	4	4	4	5	4	4	2	4	4	2	4
0	4	4	4	4	3	5	5	3	4	5	4	3	2	3	3	3	2	2	2	2	2	3	3	2	3															4	5	3	5	4	4	2	4	4	2
0	5	5	5	4	5	5	5	5	5	4	5	4	5	5	5	5	5	1	5	5	1	5	5	1	5	3	5	5	5	5	5	1	5	5	1	5	5	1	5
0	5	3	3	4	3	4	4	4	3	4	4	3	3	2	3	3	2	4	3	3	3	2	4	1	2	4	4	4	4	4	4	4	4	4	3	4	4	2	5
0	5	5	4	3	5	5	4	5	5	3	5	4	3	4	3	4	3	2	4	4	2	4	4	2	4	4	4	4	1	4	2	1	3	4	1	5	5	1	5
0	4	4	4	5	4	5	4	4	5	4	5	5	5	5	5	5	5	5	5	5	1	5	5	1	5															5	5	2	5	5	5	1	5	5	1
0	4	4	3	5	4	4	4	4	4	4	4															5	3	3	4	4	5	2	4	4	2	5	5	5	5	4	3	3	3	3	4	2	4	3	2
0	4	4	4	4	4	4	4	4	4	4	4	4	4	4	4	4	4	4	4	4	4	4	4	4	4															4	4	4	4	4	4	4	4	4	4
0	4	3	3	5	2	3	4	2	3	4	3	3	3	1	3	3	2	5	2	2	3	3	3	3	4															1	1	1	1	1	1	1	1	1	2
0	5	5	4	2	4	5	5	4	5	5	5	4	4	4	4	4	4	4	4	4	1	4	5	1	4	4	5	4	4	4	4	4	4	4	4	4	4	1	4
0	5	5	1	3	5	5	5	5	5	5	5	4	5	3	5	4	4	2	5	4	1	5	5	1	5	4	5	4	4	5	5	2	4	5	4	5	5	1	5
0	4	4	4	2	4	4	2	4	4	3	4															4	4	4	4	4	4	2	4	4	2	5	4	1	5	4	4	4	4	4	5	2	4	4	2
0	4	4	3	3	4	4	4	4	4	4	4	4	4	3	4	4	4	2	4	3	2	4	4	1	4															3	4	2	4	4	4	4	4	3	4
0	4	5	4	4	4	4	4	4	4	3	5															4	3	3	4	4	3	4	4	3	3	3	3	2	3	4	4	4	4	4	4	4	4	2	4
0	3	4	3	4	3	4	3	4	4	2	4															4	4	4	4	3	4	2	4	4	2	4	4	1	4	3	4	3	4	4	4	2	4	4	2
0	5	5	5	5	5	5	5	4	5	4	5	5	4	4	4	4	4	2	4	4	2	5	4	1	4															4	4	4	2	4	4	2	4	3	2
0	5	5	3	2	3	4	4	5	4	5	5	4	4	4	4	4	4	2	5	5	2	4	4	2	4	4	4	4	5	4	4	2	4	4	2	4	4	2	4
0	4	4	4	4	4	4	3	4	4	3	4	4	4	4	4	4	4	3	4	4	3	5	4	2	5															4	3	4	3	4	4	2	4	4	3
0	2	3	2	5	3	3	3	3	3	3	2	1	1	1	1	3	1	3	3	1	2	2	2	3	1															3	3	3	2	3	4	2	1	3	3
0	4	5	4	3	4	4	5	5	4	3	5	3	4	3	3	4	3	3	4	3	4	4	4	1	4															4	5	3	3	4	3	2	4	4	2
0	4	5	4	4	4	4	2	4	4	2	4															4	4	4	4	4	4	2	4	4	2	4	4	2	4	4	4	3	4	4	3	3	3	3	2
0	4	4	5	4	4	4	5	4	4	4	4	5	4	4	4	4	4	4	4	4	4	4	4	5	4	4	4	4	4	4	5	4	4	4	4	4	4	4	5
0	4	4	4	4	4	4	4	4	4	4	4	4	4	4	4	4	4	4	4	4	4	5	5	1	5	4	4	4	4	4	4	2	4	4	2	5	5	1	5
0	3	3	4	2	4	2	2	4	3	3	3	2	3	2	1	2	3	3	2	3	3	1	3	3	2	3	3	2	2	3	3	2	3	3	2	3	3	2	2
0	3	4	3	4	3	3	4	3	3	4	4	4	4	3	4	3	4	3	3	3	2	4	4	2	4	4	4	3	4	4	4	3	4	4	2	4	4	2	4
0	3	3	4	4	2	3	5	3	5	2	2	5	1	2	4	3	5	2	3	2	1	5	5	1	5															4	3	1	3	4	5	2	2	3	5
0	4	4	4	4	4	4	4	4	4	4	4	4	4	4	4	4	4	4	4	4	4	4	4	2	4	3	4	2	4	3	3	4	4	4	4	4	4	2	4
0	5	5	5	5	5	5	1	5	5	1	5	5	5	5	1	5	5	1	5	5	5	5	5	1	5	5	5	5	1	5	1	1	5	5	5	5	5	1	5
0	5	5	5	2	5	5	5	5	5	5	5															4	4	4	3	4	4	4	4	4	2	5	5	1	5	5	4	4	3	4	5	4	5	5	3
0	4	4	3	4	3	4	4	5	4	5	4	4	3	4	2	4	4	4	3	3	3	2	4	1	4	3	5	4	3	4	4	2	3	4	2	5	5	1	5
0	3	3	2	3	4	4	4	4	4	4	3	4	4	2	4	4	4	2	4	3	2	4	4	2	4	4	4	3	4	4	4	4	4	3	4	4	4	2	4
0	4	4	4	4	4	4	4	4	4	4	4															4	4	4	4	4	4	4	4	4	4	4	4	4	4	4	4	3	4	4	4	2	4	4	2
0	4	4	4	3	4	4	3	4	4	4	4	3	3	3	3	3	3	3	4	3	3	3	3	2	3	4	3	4	4	4	4	3	4	4	4	4	4	2	4
0	5	5	5	5	5	5	2	5	5	1	5	5	4	5	4	5	5	1	5	5	1	5	5	1	5															5	4	5	4	5	5	1	5	5	1
0	4	5	4	3	4	5	4	4	5	3	5															3	4	4	4	4	5	2	4	4	1	5	5	1	5	4	4	4	4	4	4	2	4	3	2
0	3	3	3	3	4	3	3	4	3	3	3	4	3	3	4	4	3	3	3	4	4	4	3	3	3															3	4	4	3	4	3	4	3	4	3
0	2	2	2	4	3	3	2	3	3	2	3	4	3	2	3	3	3	3	3	3	3	4	4	2	3	4	4	3	4	4	3	2	3	4	2	4	4	2	4
0	4	4	3	4	3	4	2	4	4	3	5	3	3	2	3	3	3	3	4	2	2	2	2	3	3															2	3	2	2	3	3	3	3	2	4
0	3	4	4	4	3	4	4	3	4	3	4	3	3	3	3	3	3	3	3	3	3	3	3	3	3															3	3	3	3	3	3	3	3	3	2
0	5	5	5	4	5	5	5	5	5	5	5															5	5	5	5	5	5	5	5	5	1	5	5	1	5	5	5	5	5	5	5	1	5	5	1
0	5	5	5	5	5	5	4	4	5	2	5	5	5	5	5	5	5	2	5	5	2	5	5	1	5															5	5	5	5	5	5	1	4	5	1
0	4	5	4	5	1	5	5	3	5	2	4	1	1	1	1	1	1	1	1	1	1	1	1	5	1	4	3	3	4	1	5	5	1	5	5	5	5	1	5
0	4	4	4	3	4	5	4	3	4	2	4	4	5	4	4	4	4	3	4	4	2	3	4	3	4															4	5	4	5	4	4	3	4	4	3
0	4	4	4	4	5	4	4	4	4	5	4	4	4	4	3	4	4	2	4	4	2	4	4	2	4															4	4	4	3	4	4	4	4	4	4
0	4	4	4	4	4	4	4	4	4	3	4															3	4	3	3	4	3	2	4	3	3	4	4	2	4	4	4	4	4	4	4	4	4	4	3
0	4	5	5	4	3	5	3	4	5	3	5	5	4	4	4	4	5	2	4	5	3	4	4	1	4															5	4	4	4	4	5	3	4	5	2
0	3	4	3	3	4	4	4	4	4	3	4	1	2	1	2	4	2	2	2	1	4	2	2	3	2	4	3	4	3	3	4	3	4	4	2	5	4	1	5
0	5	5	4	4	3	4	4	4	5	2	5	4	3	4	3	3	4	2	3	4	2	5	5	2	5															4	3	4	3	4	4	2	5	4	2
0	4	5	3	5	4	4	4	4	4	4	4	3	4	3	4	4	3	4	4	3	3	4	4	2	4															3	3	3	3	4	3	2	3	4	2
0	4	5	4	4	4	4	2	4	4	4	4															4	4	4	4	4	4	1	4	4	2	4	4	2	4	4	4	4	4	4	4	1	4	4	4
0	5	5	5	4	4	4	4	4	5	4	5	3	3	3	3	4	4	2	3	4	2	5	5	1	5															5	5	4	5	5	5	2	4	5	2
0	5	3	3	3	4	4	4	4	4	5	4															5	4	5	5	4	5	1	5	5	1	5	5	1	5	4	3	4	3	4	4	2	4	4	3
0	3	3	3	3	3	4	4	3	3	3	4	3	3	2	3	3	2	2	3	2	3	3	3	3	3	3	3	3	3	3	3	3	3	3	3	4	4	2	3
0	4	5	4	4	5	4	4	5	4	4	5	5	4	4	4	4	5	1	5	5	1	4	4	2	4	5	5	4	5	4	5	1	4	4	1	5	5	1	5
0	4	3	4	5	4	4	4	4	4	3	4															4	4	4	4	4	4	2	4	4	2	4	4	2	4	4	4	4	4	4	4	2	4	4	2
0	4	4	4	4	4	4	4	4	4	4	4	4	4	4	3	4	4	2	4	4	2	5	5	2	5	4	2	4	2	4	4	2	4	4	2	4	4	2	4
0	4	4	3	2	3	4	4	3	2	3	5															3	3	3	2	3	4	2	3	4	2	5	5	1	5	4	4	2	3	3	3	2	3	3	2
0	5	5	5	5	5	5	5	5	5	5	5	5	5	5	5	5	5	1	5	5	1	5	5	1	5	3	5	5	5	5	5	2	5	5	1	5	5	1	5
0	4	4	3	4	3	4	4	4	4	4	4															5	5	5	5	5	5	5	5	5	5	5	5	1	5	5	5	5	5	5	5	3	5	5	1
0	4	4	4	3	5	3	4	5	4	4	3															5	5	5	5	5	5	1	4	5	5	5	5	2	5	5	5	4	3	5	5	5	5	5	5
0	4	4	4	4	4	4	4	4	4	4	4	4	4	4	4	4	4	4	4	4	4	4	4	4	4															4	4	4	4	4	4	4	4	4	4
0	5	5	5	4	5	5	4	5	5	3	5															5	5	5	5	5	5	5	5	5	5	5	5	1	5	5	5	5	5	5	5	1	5	5	1
0	5	4	3	3	4	4	3	4	4	4	4	3	4	3	3	4	3	3	4	4	3	4	4	1	4	3	4	4	3	4	4	2	4	4	2	5	5	1	5
0	5	5	4	5	4	5	4	5	5	5	5	4	4	4	3	4	4	1	4	4	1	5	5	1	5															5	1	5	1	5	5	1	5	5	1
0	4	5	5	4	4	5	2	4	5	2	5	3	4	3	4	4	4	2	4	4	2	4	4	1	4															3	4	3	4	2	3	2	4	2	2
0	4	4	4	3	4	4	2	4	4	2	4	4	4	4	4	3	4	2	4	4	2	5	4	2	4	4	3	4	2	4	4	2	4	4	2	4	4	2	4
0	5	5	5	5	5	5	5	5	5	5	5	5	5	5	5	5	5	1	5	5	1	5	5	1	5	5	5	5	1	5	5	1	5	5	1	5	5	1	5
0	3	5	5	3	3	5	5	4	5	5	4	3	2	4	3	4	4	2	4	3	2	5	5	1	5	3	2	3	5	5	5	2	3	4	2	5	5	1	5
0	4	4	4	4	4	4	4	4	4	4	4	4	4	4	4	4	4	4	4	4	4	4	4	2	4															4	4	4	2	4	4	4	2	4	2
0	4	5	3	2	4	4	5	5	4	4	5															5	3	4	4	5	5	2	5	4	2	5	5	1	5	4	3	4	3	4	4	2	4	4	2
0	5	5	5	5	5	5	5	5	5	5	5															5	5	5	5	5	5	1	5	5	1	5	5	1	5	5	5	5	5	5	5	1	5	5	1
0	4	4	4	2	4	4	3	4	4	2	5	4	2	3	2	3	4	2	3	4	2	4	4	1	4															4	3	3	3	2	3	2	3	3	2
0	4	4	4	4	4	4	4	3	4	4	4	4	4	4	4	4	4	4	4	4	3	4	4	1	4	5	5	5	5	5	5	1	5	5	1	5	5	1	5
0	5	5	5	3	3	5	4	3	5	2	5	3	3	3	4	3	5	3	3	4	2	4	4	2	4	5	5	5	5	3	5	2	3	5	2	5	5	2	5
0	4	4	4	4	4	4	4	4	4	3	5															4	4	4	4	3	4	2	4	4	2	5	4	1	5	4	4	4	3	4	4	2	4	4	2
0	3	3	2	3	4	3	2	3	2	3	3	4	3	4	2	3	3	3	3	2	4	3	4	2	4															3	3	3	3	3	4	3	3	3	3
0	4	5	3	3	3	4	5	4	4	4	4	3	3	3	3	3	3	3	3	3	3	3	3	2	3															4	5	4	4	3	4	2	3	4	2
0	4	4	4	4	4	4	2	4	4	2	4	4	4	4	2	4	4	2	2	4	2	4	4	2	4															4	4	3	2	4	4	2	4	4	2
0	4	5	5	4	4	5	4	4	5	4	5	3	4	4	4	4	4	4	4	4	4	4	4	1	4	5	5	5	5	4	5	2	5	5	2	5	5	1	5
0	3	4	3	4	3	4	4	4	4	4	4															2	3	2	4	3	4	2	3	3	4	4	3	2	4	2	2	2	2	3	2	2	3	2	2
0	3	4	4	3	4	4	5	4	4	5	4															3	5	3	5	4	3	2	4	3	2	4	4	3	4	4	5	4	4	4	4	3	4	4	3
0	4	2	4	3	3	4	3	3	4	3	2	2	3	4	3	5	4	4	3	3	3	4	4	2	5															4	3	4	2	3	4	4	3	3	2
0	3	3	3	3	3	3	3	3	3	4	3															4	4	4	4	4	4	4	4	4	4	4	4	2	4	3	4	3	4	3	4	3	3	3	3
0	5	5	5	3	5	5	4	4	5	4	5															5	5	5	4	5	5	4	5	5	5	5	5	1	5	5	5	4	5	4	4	3	5	4	3
0	4	4	4	3	3	4	4	4	4	4	5															3	4	4	4	3	4	2	4	4	2	5	5	1	5	4	4	3	4	3	4	2	4	4	2
0	4	5	3	4	3	4	5	3	4	5	5	3	4	2	3	3	3	4	3	2	5	3	3	3	2	4	4	5	4	3	4	2	3	4	2	5	5	1	5
0	4	4	4	4	4	4	4	4	4	4	4															4	3	4	4	3	4	4	4	4	4	5	5	1	4	4	4	3	3	3	3	3	4	3	2
0	3	4	2	4	4	4	5	4	3	4	3	4	4	4	4	5	4	1	5	4	1	5	5	1	5	5	5	4	4	5	5	2	5	4	1	5	5	1	5
0	4	4	4	4	4	4	4	4	4	4	4	4	4	4	4	4	4	4	4	4	4	4	4	2	4	4	4	4	4	4	4	2	4	4	2	4	4	2	4
0	4	4	4	4	4	4	3	4	5	3	5	4	4	4	4	4	4	2	4	4	4	4	4	2	4	4	4	4	4	4	4	2	4	4	2	4	4	2	4
0	3	4	2	5	2	2	4	2	4	4	4	2	2	3	3	2	2	4	3	2	4	2	4	2	4	4	2	4	3	4	4	2	4	4	2	4	4	1	4
0	3	4	4	4	3	4	4	3	3	2	4															3	2	4	3	4	4	4	3	4	3	5	4	2	4	3	4	4	3	4	3	4	3	3	4
0	5	5	4	5	4	5	5	5	5	5	5	4	4	4	4	4	4	4	3	4	4	4	4	1	5															4	4	3	4	3	4	2	3	4	2
0	2	2	1	5	2	2	2	2	2	3	3	2	2	1	2	2	3	2	2	2	2	3	3	3	2															3	3	1	3	2	3	2	2	2	2
0	5	5	4	4	4	4	4	2	5	2	5	4	4	5	4	4	4	1	1	4	1	4	4	2	4	5	5	5	2	4	5	1	4	5	2	5	5	1	5
0	4	5	4	3	4	5	5	4	5	4	5	4	3	3	3	4	4	2	3	4	2	4	4	1	4															4	5	3	4	4	4	2	4	4	2
0	5	5	4	4	4	4	4	4	4	4	5	4	2	3	2	4	4	3	4	3	2	4	4	2	4	5	4	4	3	4	4	2	4	4	2	5	4	2	4
0	3	4	3	4	3	2	2	2	4	2	3															3	4	3	4	4	3	2	2	4	2	4	4	2	4	3	2	3	3	3	3	2	2	3	2
0	5	4	3	4	3	4	4	3	4	4	4															4	2	4	4	4	4	2	4	4	2	5	5	1	5	4	4	3	2	3	4	2	4	3	2
0	2	2	2	2	2	2	2	4	2	2	2	1	2	2	2	4	2	2	4	2	2	2	2	4	2															1	2	1	2	4	1	2	5	2	1
0	5	5	5	5	3	5	5	3	5	5	5	3	3	3	3	4	3	2	4	3	2	4	4	1	4															4	4	3	3	3	3	2	3	3	2
0	4	4	4	5	4	4	3	4	4	3	4	4	4	4	4	3	4	3	3	4	2	4	5	2	4															4	4	3	4	4	4	2	3	4	2
0	4	4	3	4	4	5	3	3	5	3	5															5	4	3	3	4	3	4	2	5	3	5	4	1	5	3	3	5	3	4	5	3	2	5	3
0	4	5	4	5	5	5	4	5	4	4	5	4	3	4	3	5	4	4	5	4	4	5	5	1	5															4	4	4	5	5	5	1	5	5	1
0	3	5	4	5	4	4	4	5	4	4	5															4	1	5	3	5	5	1	5	5	1	5	5	1	5	5	4	5	5	5	5	1	5	5	5
0	4	2	3	2	3	3	4	4	4	2	2	4	4	4	2	3	2	3	3	2	4	4	4	2	2															2	4	3	4	2	4	2	3	3	3
0	5	5	5	3	4	5	2	4	5	2	5	5	5	5	3	4	5	2	4	5	2	5	5	1	5	5	4	5	2	4	5	2	3	5	2	5	5	1	5
0	4	4	4	3	4	3	3	4	4	4	4	3	3	3	3	3	3	3	3	4	3	4	4	4	4															3	4	4	3	4	3	4	3	3	3
0	4	4	4	2	3	4	4	3	4	3	4															4	4	3	3	4	4	2	4	4	2	4	4	2	4	4	2	3	2	4	4	2	4	3	2
0	4	5	5	4	3	5	5	3	5	4	5	5	3	4	3	3	4	1	4	4	1	5	5	1	5	4	4	5	2	3	5	1	4	5	1	5	5	1	5
0	4	4	4	4	4	4	2	4	4	2	4															4	4	4	4	4	4	2	4	4	2	4	4	2	4	4	4	4	4	3	4	2	3	4	2
0	4	4	3	2	2	4	2	4	4	2	4	4	2	3	3	2	4	2	4	4	2	4	4	2	4	4	4	4	4	2	4	2	2	4	2	5	5	1	5
0	2	2	2	2	2	2	4	2	2	4	4															4	4	4	4	4	4	2	4	4	2	4	4	2	4	2	2	2	2	2	2	4	2	2	4
0	5	4	5	3	4	4	4	4	4	3	4															4	4	4	4	4	4	2	4	4	4	4	4	2	5	5	5	4	2	4	5	2	4	4	2
0	5	5	4	1	5	5	5	5	5	5	4	5	5	4	5	5	5	1	5	4	1	5	5	5	5															5	5	4	5	5	3	1	3	3	1
0	5	4	3	4	4	4	4	5	4	4	4															4	5	4	4	4	4	4	4	4	4	5	5	1	5	4	4	2	5	3	4	4	4	2	4
0	5	5	5	5	5	5	5	5	5	5	5	5	5	3	5	4	3	1	5	3	1	3	4	1	4															5	5	5	5	5	5	1	5	5	1
0	3	4	4	5	3	4	3	3	4	2	4	3	2	2	2	3	2	2	3	3	3	3	3	3	4	3	3	2	3	3	3	4	3	3	4	4	4	2	4
0	3	4	2	2	4	4	4	3	4	3	4	3	4	3	4	4	4	2	4	4	3	4	4	2	4															4	4	3	4	4	4	2	4	4	2
0	5	5	4	2	5	5	5	4	5	3	5	5	5	5	5	5	4	5	4	5	4	4	5	1	5	5	5	4	4	5	4	3	5	4	4	5	5	1	5
0	3	5	5	2	4	5	4	4	5	4	5	1	1	1	1	5	1	5	4	1	5	1	1	5	1	5	5	5	5	5	5	1	5	5	1	5	5	1	5
0	2	4	4	4	4	4	4	4	2	2	2	2	4	4	2	4	4	4	2	2	2	2	2	4	4	2	4	2	2	4	2	4	4	4	2	2	2	4	4
0	4	3	4	4	3	4	5	4	4	4	5															5	3	5	3	5	5	2	5	5	2	5	5	1	5	4	2	4	3	3	4	2	4	3	2
0	3	5	2	3	4	4	4	4	4	3	5	2	3	2	3	2	3	2	3	2	2	2	3	2	3															3	2	2	4	3	3	2	3	3	2
0	3	5	5	4	4	4	5	4	5	4	5	4	4	4	4	5	5	2	5	4	2	5	5	1	5	5	5	5	5	5	5	1	5	5	1	5	5	1	5
0	2	5	4	5	5	5	5	4	5	5	5															2	4	2	5	4	2	5	2	2	5	5	5	1	5	2	5	2	5	4	2	4	4	2	4
0	5	5	5	4	2	5	1	5	5	1	5	2	5	4	3	3	4	2	4	2	2	4	5	2	4	5	2	5	5	5	5	1	5	5	1	5	5	1	5
0	5	5	4	4	4	5	4	4	4	4	4	4	4	4	4	4	4	2	4	4	2	5	5	1	5															4	4	4	4	4	4	2	4	4	2
0	4	4	4	5	3	3	3	3	4	2	4	3	4	3	3	4	4	2	3	3	2	4	4	2	3															5	4	4	3	4	4	3	4	3	3
0	5	5	5	3	5	5	5	5	5	5	5	5	5	5	5	5	5	5	5	5	5	5	5	3	5															4	4	4	4	4	4	3	4	4	3
0	4	5	4	4	5	5	4	4	5	4	5	4	5	4	4	5	4	3	5	5	3	5	4	1	5	4	3	4	4	4	4	2	4	5	4	4	5	1	5
0	3	4	3	4	4	3	4	3	4	4	4															3	4	3	4	4	4	4	4	4	4	4	4	2	4	3	4	3	4	4	4	2	4	4	4
0	2	4	3	3	4	3	4	3	2	4	4															4	3	3	3	4	2	3	3	2	5	4	2	3	3	4	3	4	3	2	3	2	3	4	3
0	4	4	3	4	4	4	3	2	4	5	4															4	5	4	2	4	4	2	4	4	4	5	5	1	4	4	4	4	4	4	4	3	4	4	4
0	3	3	3	4	3	3	5	3	3	4	3															3	3	4	4	3	4	4	3	4	2	3	4	2	4	4	3	3	3	3	4	2	3	3	2
0	4	5	2	4	4	4	4	4	2	4	5	2	4	2	4	4	2	1	4	2	2	4	4	1	4															4	3	2	3	4	2	1	4	2	2
0	4	4	3	3	4	4	4	4	4	4	4	3	4	3	4	4	4	4	4	4	4	4	4	2	4															3	4	3	4	4	3	4	4	3	3
0	4	5	4	5	5	5	4	4	5	4	5	4	4	4	4	4	4	2	4	4	2	5	5	1	4	3	4	3	4	4	4	3	4	4	4	4	4	2	4
0	5	4	5	5	5	5	2	5	5	3	4	5	5	4	3	5	5	3	5	4	2	4	3	2	4	4	4	4	4	4	4	2	4	4	4	4	5	2	4
0	4	4	3	3	3	4	3	3	3	4	4	4	3	4	3	3	3	2	3	4	2	3	4	3	4															3	3	3	3	3	3	3	3	3	3
0	4	5	3	4	3	4	4	3	4	4	4	2	2	2	2	2	2	3	2	2	2	2	2	2	3	4	3	3	4	3	3	2	3	3	2	4	4	2	4
0	4	4	4	3	4	4	4	4	4	4	4	4	4	4	3	4	4	4	4	4	4	4	4	2	4															4	4	4	4	4	4	4	4	4	4
0	4	4	5	5	4	4	2	4	4	2	5															5	3	5	5	5	5	1	4	5	1	5	5	1	5	4	3	4	2	4	4	4	3	5	4
0	5	5	4	5	5	5	4	5	5	5	5	5	4	5	4	5	4	3	5	5	3	5	5	1	5															5	5	5	4	5	5	2	5	5	2
0	4	4	4	4	4	4	4	4	4	4	4	3	3	3	4	4	4	4	4	3	4	4	4	2	4	4	5	5	5	5	5	2	5	5	2	5	5	2	5
0	4	3	4	4	3	5	4	4	5	2	4															4	5	4	4	3	4	2	4	4	2	5	5	1	5	4	4	4	2	4	4	2	4	4	2
0	3	4	3	4	4	4	4	4	4	4	4	3	3	3	4	4	3	3	4	3	3	4	4	2	4	4	3	4	2	4	4	2	4	4	2	4	4	2	4
0	4	4	3	4	4	4	3	3	4	3	4	4	3	3	4	3	4	3	4	3	3	4	4	2	4															4	3	3	4	3	4	3	3	4	2
0	5	5	5	5	5	5	1	5	5	1	5	5	5	5	5	5	5	1	5	5	1	5	5	1	5	5	5	5	5	5	5	1	5	5	1	5	5	1	5
0	3	4	4	4	4	4	4	4	4	4	5	2	3	2	3	3	3	2	3	2	2	4	4	1	4	4	5	5	5	5	4	2	4	5	2	5	5	1	5
0	2	5	4	4	5	4	5	4	4	5	5															3	5	4	5	4	4	4	4	4	4	4	4	2	4	4	5	3	5	4	3	4	4	3	4
0	4	5	5	5	5	4	4	4	5	4	4															4	4	5	5	5	5	4	4	5	4	4	5	4	5	5	4	4	5	5	5	4	4	5	4
0	4	5	4	4	4	4	5	4	5	4	4															4	5	4	5	4	5	4	5	4	4	5	4	4	5	5	4	4	4	4	4	5	5	5	4
0	4	4	5	5	3	5	5	3	5	4	5	4	3	3	3	4	3	2	3	3	2	2	3	2	4															5	1	5	1	2	4	2	3	4	2
0	2	3	2	4	2	2	4	4	2	4	3															4	3	2	3	4	4	2	4	4	2	4	4	2	4	2	3	2	2	3	2	2	4	2	2
0	4	4	4	4	4	4	4	4	4	4	4	4	4	4	4	4	4	4	4	4	2	4	4	4	4															4	4	4	4	4	4	4	4	4	3
0	5	5	5	3	3	5	5	3	5	3	5	5	3	5	1	3	5	1	3	5	1	5	5	1	5	5	3	5	3	3	5	1	3	4	2	5	5	1	5
0	3	4	4	3	3	4	4	3	4	4	5	3	3	3	3	3	4	2	3	4	2	4	4	1	4															4	4	4	4	4	4	3	4	4	2
0	4	5	5	4	4	5	5	5	5	5	5															3	5	3	4	4	4	4	3	4	4	5	5	1	5	4	3	3	3	3	4	3	4	4	3
0	5	5	5	4	4	5	5	4	5	5	5															3	5	5	5	5	5	5	5	5	2	5	5	1	5	3	5	5	5	5	5	2	5	5	2
0	3	3	2	2	4	3	4	4	3	4	4	2	2	2	2	4	2	4	4	2	3	2	2	4	2	3	4	4	4	4	4	4	4	4	2	4	4	2	4
0	3	3	4	2	4	4	2	4	4	2	5	5	4	5	5	5	5	5	5	5	4	4	4	4	4	5	4	3	3	4	3	4	4	3	3	2	2	2	3
0	4	4	3	4	3	4	3	3	4	3	4	2	2	2	3	3	3	3	2	2	3	3	3	3	3	4	3	4	3	4	4	2	3	4	2	5	4	2	4
0	4	4	4	4	4	4	4	4	4	4	5															4	4	5	5	4	5	3	4	4	4	4	4	2	4	4	2	3	2	4	4	3	3	4	3
0	3	3	3	4	2	3	5	2	3	4	3	1	3	2	3	2	2	2	2	2	3	2	3	3	2	3	4	3	4	3	4	3	4	4	2	5	5	1	5
0	5	5	2	2	3	5	5	1	5	2	5															5	5	2	5	3	4	5	4	4	2	5	5	2	5	5	5	1	1	3	2	1	4	2	2
0	4	3	3	3	3	4	4	4	4	4	4	4	2	3	3	4	4	4	3	4	4	4	4	2	4															4	2	4	2	3	4	2	3	4	2
0	3	3	3	3	3	3	3	3	3	3	3															3	3	3	3	3	3	3	3	3	3	3	3	3	3	3	3	3	3	3	3	3	3	3	3
0	5	5	5	4	4	5	5	4	5	5	5	3	4	5	4	4	5	1	5	5	2	5	5	1	5															4	3	4	3	4	5	2	4	4	1
0	5	5	5	5	5	5	5	5	5	5	5	5	5	5	5	5	5	5	5	5	5	5	5	5	5															4	4	4	4	4	4	4	4	4	4
0	1	1	1	4	2	4	5	3	2	5	2	1	1	1	1	1	1	4	1	1	1	1	1	5	1															1	1	1	1	1	1	1	1	1	2
0	5	5	4	4	5	5	1	5	4	1	5															5	5	5	5	5	5	1	5	5	1	5	5	1	5	5	5	5	5	5	5	1	5	5	1
0	3	3	3	3	3	3	4	4	3	4	4	3	2	2	3	4	3	3	4	3	2	3	4	3	4	5	4	5	2	5	5	1	5	5	2	5	5	1	5
0	4	4	4	4	4	4	3	4	5	3	5	4	3	4	4	4	4	2	4	4	2	4	4	1	4	4	4	4	4	4	5	4	4	4	2	5	4	2	4
0	5	4	4	4	4	5	3	4	5	2	5	4	5	5	4	4	5	4	4	5	2	5	5	1	5	4	4	3	4	5	4	3	5	5	3	4	5	2	5
0	3	4	3	3	4	3	4	3	4	4	3	2	3	4	4	4	4	3	4	2	4	4	4	4	4	3	3	3	4	3	4	4	3	4	4	3	3	2	3
0	4	4	4	4	3	4	4	4	4	4	3															4	4	4	3	4	4	4	4	4	3	4	4	2	4	4	4	3	4	4	4	4	4	3	4
0	2	3	3	5	2	3	2	3	3	2	5	1	3	1	3	3	1	1	2	1	3	1	1	5	1	3	1	4	3	2	5	1	2	5	2	3	3	2	3
0	1	2	1	4	1	2	2	3	1	1	2															5	5	5	1	3	5	1	5	5	2	5	5	1	5	2	1	1	2	3	1	1	1	1	1
0	4	3	2	2	2	3	4	4	3	4	3															4	3	4	2	4	4	2	4	4	2	4	4	2	4	3	2	3	2	4	3	2	4	3	2
0	5	5	5	5	5	5	5	5	5	5	5	5	5	5	5	5	5	5	5	5	5	5	5	5	5															3	4	3	3	3	3	3	5	3	3
0	3	5	4	5	4	4	4	4	4	4	4															4	3	4	4	4	4	2	4	4	4	5	5	2	4	3	3	3	3	4	3	3	3	3	4
0	2	3	2	4	4	4	3	4	3	3	4	4	2	3	3	3	4	2	4	4	2	4	4	2	4															3	4	3	3	3	4	2	4	3	3
0	5	3	5	4	3	4	4	5	4	3	4	5	5	3	5	5	5	5	2	5	4	4	5	4	3	3	4	5	3	3	3	3	5	3	5	3	4	2	4
0	4	5	4	4	5	4	4	4	4	5	4															5	4	4	4	5	4	5	4	4	5	2	2	3	2	4	4	4	4	5	5	4	5	4	1
0	4	5	4	4	4	5	4	4	4	4	5	2	2	2	4	4	2	2	4	2	2	2	2	4	4															4	4	4	4	4	4	2	4	4	1
0	1	1	1	1	1	1	1	1	1	1	1	1	1	1	1	1	1	1	1	1	1	1	1	5	1	1	1	1	1	1	1	1	1	1	1	1	1	1	1
0	2	4	4	4	3	5	4	5	5	4	4	5	3	4	5	4	4	5	3	5	5	4	4	2	5	5	4	4	5	4	4	5	4	5	5	5	4	4	4
0	4	5	4	3	3	5	3	3	5	2	4	4	3	4	3	3	4	2	3	4	1	5	5	1	5															4	3	4	3	3	4	2	3	4	2
0	3	2	3	4	2	3	3	2	2	3	4	1	1	1	1	1	1	1	1	1	1	2	2	3	2															1	2	1	3	2	1	1	1	1	2
0	4	5	4	4	4	4	4	4	4	4	5	3	4	4	3	4	4	2	5	4	2	4	4	1	4															4	4	3	4	4	4	1	4	4	1
0	4	4	3	2	3	4	2	4	4	3	4	3	4	2	4	3	3	2	4	2	2	3	3	3	3															4	4	4	5	4	4	2	4	4	2
0	4	4	4	4	4	4	5	4	4	3	5															5	5	4	5	5	5	3	5	5	3	5	5	1	5	4	5	4	5	5	4	3	5	4	3
0	5	5	5	5	5	5	5	5	5	5	5	5	5	4	1	5	5	1	5	5	1	5	5	1	5	4	2	4	2	4	4	2	4	4	2	4	4	2	4
0	5	5	4	5	4	5	5	4	5	5	5	5	2	4	3	4	4	5	4	5	2	5	5	1	5	5	3	4	2	4	5	2	3	4	5	5	5	1	5
0	4	4	3	4	3	4	2	3	3	2	5	3	4	3	4	3	4	2	3	3	2	4	4	1	4															3	4	3	3	3	3	2	3	3	2
0	5	5	4	4	5	5	4	5	5	5	5	3	3	4	3	4	4	2	4	4	3	5	4	2	4															5	5	4	5	4	4	4	4	4	3
0	5	5	5	5	5	5	5	5	5	5	5	5	5	5	5	5	5	5	5	5	5	3	3	5	4	3	4	2	4	2	2	3	2	3	3	1	2	2	2
0	3	4	4	2	4	4	3	4	4	3	5	2	2	2	3	3	3	4	3	3	4	3	4	3	4															3	3	4	4	4	4	2	3	3	3
0	4	4	4	4	4	4	4	4	4	4	4	4	4	4	4	4	4	4	4	4	4	4	4	2	4															4	4	4	4	4	4	2	4	4	3
0	5	4	5	5	5	5	5	4	4	4	4	5	5	5	5	5	5	5	5	5	5	4	5	1	4															5	4	4	4	4	4	4	4	4	2
0	4	4	3	2	3	4	5	3	4	5	5															4	4	4	5	3	4	4	3	4	2	4	4	2	4	5	1	5	5	3	5	1	3	5	1
0	2	3	3	3	2	4	4	3	4	4	4															4	3	3	3	3	4	4	4	4	2	4	4	2	4	3	3	3	2	4	3	2	4	3	2
0	4	4	4	4	4	4	5	4	4	4	4	4	4	4	4	4	4	4	4	4	4	4	4	1	4															3	4	3	4	4	4	4	4	4	4
0	1	1	1	3	1	1	1	2	1	4	2															1	1	1	1	2	1	2	1	1	1	2	2	3	2	1	2	1	2	1	1	1	1	1	1
0	4	4	4	4	3	4	5	4	4	4	4	2	2	3	2	3	3	2	2	3	2	3	3	2	2															4	4	4	4	4	4	4	4	4	2
0	4	5	4	5	4	4	5	4	5	5	4															5	4	4	5	5	4	5	4	4	5	4	4	5	5	4	5	4	4	4	4	5	5	4	5
0	4	4	2	3	3	3	4	3	4	3	4	3	3	3	3	4	4	2	3	4	2	4	4	2	4	4	4	4	3	4	4	2	4	4	2	4	4	2	4
0	4	5	4	4	4	5	3	4	5	4	5															4	5	4	5	4	5	2	4	4	2	5	5	1	5	4	3	3	2	4	4	2	4	4	2
0	4	5	5	4	5	5	5	4	5	4	4															4	4	4	4	5	5	2	4	5	5	5	5	1	5	5	5	5	5	5	5	1	5	5	1
0	5	5	5	3	4	5	5	4	5	5	5															5	5	5	5	5	5	3	4	5	4	5	5	1	5	4	5	5	4	4	5	1	4	5	1
0	1	2	1	4	3	2	5	3	1	5	4	1	2	1	1	3	2	2	4	1	2	4	4	1	4	4	5	2	3	4	4	4	4	2	4	4	3	2	4
0	3	3	3	3	2	2	4	3	2	3	2	2	2	2	2	2	2	3	2	2	4	2	4	3	3	4	4	4	3	4	4	4	4	4	4	4	4	2	4
0	4	4	4	5	4	5	4	5	4	5	4	4	4	4	4	4	4	4	4	4	4	4	4	4	4															4	4	4	4	4	4	4	4	4	4
0	4	4	4	2	4	4	2	4	4	2	4	4	4	4	4	4	4	2	4	4	2	4	4	2	4															4	4	4	4	4	4	2	4	4	2
0	4	4	3	3	3	4	4	3	3	4	3	3	3	3	3	3	3	3	3	3	3	3	4	2	4															3	3	3	3	3	3	4	3	3	4
0	3	4	3	2	4	4	4	4	4	4	5	3	2	3	2	4	4	2	4	4	2	4	4	1	4															4	5	2	5	4	3	2	4	3	4
0	5	4	3	5	4	5	3	4	5	3	5	3	2	2	3	3	3	2	4	2	2	2	1	3	2															3	3	3	3	3	3	3	3	3	3
0	5	5	5	5	4	5	2	4	4	2	5															5	4	5	4	4	5	1	4	5	2	5	5	1	5	5	4	4	5	4	5	1	4	5	1
0	4	5	5	4	2	5	4	3	5	4	5	4	5	3	4	4	5	3	2	5	4	5	5	2	5	4	4	4	5	4	5	5	5	4	3	5	5	1	5
0	4	5	5	4	4	5	4	4	5	4	5	5	4	5	4	4	5	2	4	5	2	5	5	1	5															4	4	4	4	4	4	2	4	4	2
0	3	4	3	4	3	4	5	2	4	5	4	3	4	4	4	3	4	3	2	4	2	4	4	2	4															4	4	4	4	3	4	2	2	4	2
0	4	4	2	4	4	4	4	4	4	4	4	2	4	3	4	4	3	4	4	3	4	4	4	2	3															4	4	2	4	3	3	2	2	2	2
0	3	3	3	3	3	3	3	3	3	3	3															3	3	3	3	3	3	3	3	3	3	3	3	3	3	3	3	3	3	3	3	3	3	3	3
0	3	4	2	5	3	2	5	3	3	5	3															3	2	4	2	3	4	1	4	3	2	5	5	1	5	2	3	2	3	3	3	2	3	2	2
0	3	5	3	3	3	5	4	4	4	4	5	4	4	4	4	4	5	3	4	5	3	3	4	1	3	5	5	5	4	4	5	2	4	5	3	5	5	1	5
0	4	4	4	2	4	5	3	4	5	3	4	4	2	5	2	4	4	2	4	5	2	5	5	1	5															5	1	5	1	5	5	2	5	5	2
0	4	4	3	3	3	4	4	3	4	4	4	3	4	4	3	4	4	2	4	4	2	4	4	2	4															3	3	2	3	3	4	2	3	3	2
0	3	3	1	2	5	4	2	3	3	4	3	2	5	3	4	3	3	1	2	1	4	2	3	4	3	3	2	3	3	3	3	3	5	3	3	3	4	2	3
0	4	5	4	3	3	5	4	4	5	5	5															5	4	5	4	3	4	3	4	4	2	4	4	2	4	4	3	4	3	3	4	2	3	3	2
0	4	4	4	4	4	4	4	4	4	4	4															4	4	4	4	4	4	4	4	4	4	4	4	4	4	4	4	4	4	4	4	4	4	4	4
0	5	5	5	4	5	5	5	5	5	5	5	5	5	5	5	5	5	5	5	5	5	5	5	5	5															5	3	4	1	5	5	1	3	5	1
0	2	4	3	3	2	3	5	3	3	4	4	2	3	2	3	2	2	4	3	2	4	4	4	3	4	3	3	3	3	2	3	4	2	3	4	4	4	2	4
0	3	5	3	5	4	5	4	4	5	5	5	5	5	4	4	5	4	3	3	4	3	4	5	5	4															5	4	4	5	4	4	5	5	4	5
0	4	5	3	3	3	4	4	4	4	4	5	4	3	3	3	3	4	4	3	3	3	3	4	2	4															3	5	3	4	3	4	3	4	3	3
0	4	4	4	4	3	4	3	3	4	4	4															4	4	4	4	4	4	2	4	4	2	4	4	2	4	2	3	4	4	4	4	2	3	4	2
0	4	2	5	5	3	2	1	3	4	4	4															4	2	4	1	3	2	5	4	5	3	4	5	3	2	5	1	4	4	5	2	4	3	2	3
0	3	4	4	4	3	4	3	3	4	3	4	4	4	3	4	3	4	2	3	4	2	3	4	2	4	4	2	4	2	3	4	1	3	4	1	4	4	1	4
0	4	4	4	4	4	4	2	4	4	4	4	4	4	4	4	4	4	2	4	4	2	4	4	2	4															4	4	4	4	4	4	2	4	4	2
0	3	3	2	4	3	3	2	2	3	2	3	1	3	1	3	2	1	2	2	1	4	2	3	3	3															3	2	2	3	2	1	2	4	1	1
0	5	5	5	4	5	5	1	4	5	1	5															5	5	5	5	5	5	5	3	5	1	5	5	1	5	5	5	4	5	5	5	1	5	5	1
0	5	5	5	2	4	5	2	4	5	2	5															4	4	5	2	4	5	2	4	5	2	5	5	1	5	4	2	4	2	4	4	2	4	4	2
0	5	5	5	4	4	5	4	5	5	4	5	5	5	5	4	4	4	4	4	4	4	4	4	2	5	4	4	4	4	5	5	4	5	5	4	4	5	2	5
0	4	4	4	5	4	4	3	3	4	3	4	4	4	4	3	4	4	2	3	4	2	4	4	2	4	4	4	4	5	4	4	2	4	4	2	5	5	1	5
0	3	4	2	3	3	2	4	3	4	4	4	4	4	4	3	4	4	2	4	3	2	4	4	4	4															3	4	3	3	3	2	2	2	2	2
0	4	2	3	4	5	5	1	1	3	1	1	3	3	4	5	2	1	4	1	1	4	1	3	4	3	4	1	3	1	5	1	1	3	3	3	3	5	4	1
0	5	5	4	3	3	5	1	3	5	2	5	5	4	3	4	3	5	1	3	5	1	4	5	1	5	5	5	5	5	3	5	1	3	5	1	5	5	1	5
0	4	5	4	4	5	5	5	5	5	5	5	5	5	5	5	5	5	1	5	5	1	5	5	1	5	5	5	5	5	5	5	1	5	5	2	5	5	2	5
0	4	3	4	4	3	4	2	4	4	2	4															4	3	3	3	3	3	4	4	3	4	4	4	2	4	4	3	3	2	3	3	2	4	3	2
0	4	5	5	2	4	5	4	5	5	2	5															4	4	5	5	4	5	2	5	5	2	5	5	1	5	4	5	5	5	4	5	2	4	5	2
0	4	4	4	4	4	4	4	4	5	4	4															4	4	4	4	4	4	3	4	4	3	4	4	2	4	4	4	4	4	4	4	3	4	4	3
0	5	5	5	5	5	5	4	5	5	4	5															5	5	5	5	4	5	2	4	5	2	5	5	1	5	5	5	5	5	5	5	2	4	5	2
0	3	4	4	3	4	5	5	4	5	4	5	4	2	1	2	4	3	2	5	1	2	3	2	1	2	3	3	2	4	4	5	5	5	5	4	4	4	1	4
0	5	5	5	5	5	5	5	5	5	5	5															5	5	5	5	5	5	5	5	5	5	5	5	1	5	5	5	5	5	5	5	5	2	5	3
0	4	5	4	4	4	4	5	4	5	4	5	4	4	4	4	4	4	2	4	4	2	4	4	2	4	4	4	4	4	4	4	2	4	4	2	5	5	1	5
0	4	2	2	2	3	4	4	4	4	4	4															3	4	2	4	3	4	2	4	4	2	5	5	1	5	4	4	2	4	3	4	2	4	4	2
0	4	4	4	4	4	4	4	4	4	4	5	1	4	1	4	3	1	1	3	1	1	1	1	4	1	5	5	5	5	5	5	1	5	5	1	5	5	1	5
0	4	4	4	3	3	4	2	4	4	2	4	4	3	4	3	4	4	2	4	4	2	4	4	1	4	5	5	5	4	4	5	1	4	5	1	5	5	1	5
0	5	4	4	4	3	5	3	3	5	2	4															3	2	2	3	2	4	2	2	3	2	3	3	1	3	4	4	2	5	3	3	1	4	3	2
0	4	4	2	3	4	4	4	4	4	4	4	4	4	4	4	4	4	4	4	4	4	4	4	2	4															4	4	4	4	4	4	3	4	4	3
0	4	5	4	5	4	5	4	4	5	2	4	2	3	1	3	2	2	5	3	2	3	3	3	2	2															3	4	1	4	2	2	2	2	3	2
0	3	3	2	4	4	4	4	4	3	4	4															2	2	2	3	3	3	3	3	2	3	3	3	2	4	2	3	2	3	3	3	2	3	3	2
0	4	3	3	4	3	4	3	3	4	3	4	2	3	3	3	3	3	3	3	3	3	3	4	2	3	4	4	3	4	3	4	2	4	4	2	4	4	4	4
0	4	5	4	1	4	5	5	4	4	5	5	2	2	2	3	4	3	4	4	4	2	4	3	2	3															2	3	3	4	4	4	2	4	4	2
0	4	4	3	4	3	3	4	3	3	4	3	3	3	2	2	3	4	3	3	2	3	3	3	3	3															3	3	4	4	3	3	3	3	4	2
0	5	5	5	4	5	5	2	4	5	3	5	5	4	5	5	4	5	3	4	5	3	5	5	3	5	4	4	4	3	4	4	5	4	5	3	5	5	2	5
0	4	5	5	3	5	5	5	5	5	5	5															5	4	4	4	4	5	2	4	5	2	5	5	1	5	5	4	4	4	5	5	4	5	4	2
0	5	5	5	5	5	5	5	5	5	5	5															5	5	5	5	5	5	4	5	5	4	5	5	1	5	3	5	3	5	3	1	3	3	3	5
0	5	5	3	5	4	5	3	4	4	3	5	3	3	3	4	4	4	3	4	4	3	4	4	4	4															3	4	4	3	4	4	3	3	4	2
0	4	4	5	3	3	5	5	4	4	5	5	3	3	4	3	4	3	4	4	4	2	4	4	2	4															5	5	5	5	5	5	2	5	5	2
0	4	4	3	4	4	5	4	4	3	4	5	4	5	5	2	4	5	2	5	5	5	4	5	2	5															2	2	2	4	2	4	4	4	2	3
0	4	5	4	4	3	4	4	5	4	4	4															4	5	3	5	3	5	3	5	5	2	5	5	1	5	5	4	3	3	3	4	2	5	4	2
0	4	5	4	2	4	4	3	5	4	4	4	4	5	5	4	5	4	4	5	4	5	4	5	4	5	5	4	4	4	4	4	5	5	4	4	5	4	5	4
0	3	4	3	3	4	4	4	4	3	4	5	2	3	3	3	4	4	3	4	3	3	4	5	2	4	2	3	4	3	4	3	2	4	3	2	5	5	2	5
0	4	4	3	4	3	4	5	3	4	5	4	3	3	3	3	2	3	3	2	3	2	3	3	2	4															3	3	3	3	2	3	4	2	2	4
0	4	4	4	4	4	4	4	4	4	4	4	4	4	4	4	4	4	2	4	4	2	5	4	2	4															4	4	4	4	4	4	2	4	4	4
0	4	4	4	4	4	5	3	4	4	3	4															4	5	4	5	4	4	2	4	4	2	5	5	1	5	4	4	4	5	4	4	1	4	4	2
0	3	3	3	5	4	3	4	4	3	3	4	2	3	2	3	3	3	2	3	2	3	2	2	3	2	3	5	4	4	4	4	1	4	5	1	5	5	1	5
0	4	4	4	4	4	4	4	4	4	4	4	4	4	4	4	4	4	4	4	4	4	4	4	4	4															4	4	4	2	2	4	4	4	4	2
0	4	3	3	5	5	4	2	5	4	3	3	1	2	2	2	2	2	2	5	2	2	3	3	3	3	4	4	5	5	5	5	1	4	4	2	5	5	1	5
0	4	5	5	5	5	5	5	5	5	3	5															3	3	5	5	5	5	1	4	5	1	5	5	1	5	4	5	5	5	5	5	1	4	5	1
0	5	5	5	2	5	5	4	5	5	2	5	3	4	3	4	4	3	3	4	3	2	4	4	1	4	5	5	5	5	5	5	1	5	5	1	5	5	1	5
0	4	4	4	2	4	4	4	3	4	4	5	4	4	4	3	4	4	3	3	5	3	5	5	2	5															4	4	4	4	3	4	2	3	4	2
0	5	4	5	5	4	5	3	4	4	4	4	4	4	3	4	4	4	5	4	4	5	3	3	3	3	5	5	5	5	5	5	5	4	4	4	5	5	1	5
0	5	5	4	4	3	5	5	4	5	4	5	4	3	4	3	3	3	3	3	4	3	4	4	2	4	4	3	4	3	3	4	2	4	4	2	4	4	2	4
0	3	4	3	4	3	3	4	4	4	4	3															4	3	4	4	3	4	2	4	5	2	5	5	1	5	4	3	3	3	4	4	3	4	4	2
0	5	5	5	2	5	5	5	5	5	5	5	5	4	5	4	5	5	1	5	5	1	5	5	1	5															5	5	5	5	5	5	1	5	5	1
0	4	4	4	4	4	4	4	4	4	4	4	3	3	3	3	3	2	4	3	2	4	3	3	3	3															3	4	3	4	3	4	3	4	4	3
0	4	3	4	3	3	3	3	3	3	4	3															4	4	4	4	3	4	3	3	4	2	5	5	2	5	3	3	3	3	3	3	3	3	3	3
0	5	5	5	4	5	5	4	5	5	5	5															5	5	5	1	5	5	1	5	5	1	5	5	1	5	5	5	5	1	5	5	2	5	5	2
0	5	5	4	5	3	5	4	4	5	4	5	4	4	3	4	3	4	2	4	4	3	4	4	2	4															4	5	2	5	3	3	3	4	3	2
0	4	4	4	4	4	4	4	4	4	4	4	4	4	4	4	4	4	4	4	4	4	5	4	4	4															4	4	4	4	4	4	4	4	4	4
0	5	5	4	4	4	5	5	5	4	5	5															3	3	3	3	3	3	4	3	3	4	3	3	3	3	4	4	3	3	4	3	3	3	3	3
0	4	4	3	4	4	4	2	4	4	2	4	3	4	4	4	4	4	2	4	4	2	4	4	2	4	4	4	4	2	4	4	2	4	4	2	4	4	2	4
0	5	5	5	5	4	5	2	5	4	2	5	5	5	5	5	5	5	5	4	5	4	4	5	5	5															3	5	3	3	3	3	3	4	3	5
0	3	4	3	5	4	4	2	4	3	2	5	3	4	3	2	4	4	2	4	3	2	5	5	1	5															3	3	2	3	4	3	2	4	3	2
0	5	5	5	3	4	5	4	4	5	4	5															4	5	5	5	5	4	1	4	5	1	5	5	1	5	5	4	4	4	4	4	1	4	4	1
0	2	2	2	5	2	4	1	3	4	1	3	2	4	2	4	4	2	1	3	3	1	5	5	1	4															1	4	1	4	2	2	4	4	2	5
0	5	5	5	5	5	5	5	5	5	5	5															5	5	5	5	5	5	1	5	5	1	5	5	1	5	5	5	5	5	5	5	1	5	5	1
0	4	5	4	5	4	5	5	4	4	4	4	3	2	3	2	4	4	3	4	3	2	4	4	1	4	3	4	3	4	4	4	3	4	4	2	5	5	1	5
0	4	4	4	4	3	4	2	4	4	2	4															4	4	2	4	3	4	4	3	4	4	4	4	2	4	4	4	2	4	3	3	4	3	2	2
0	4	5	3	5	4	4	2	4	3	1	4															4	5	3	5	4	5	1	4	5	1	5	5	1	5	3	4	3	4	4	3	4	4	2	4
0	2	4	3	4	3	4	2	2	4	3	4	2	2	2	2	2	2	2	2	2	2	2	3	2	3															3	4	5	4	2	4	1	4	4	1
0	4	4	5	4	4	4	4	4	4	4	4															4	5	4	4	5	5	3	4	5	3	5	5	2	5	4	3	4	4	4	4	2	4	4	3
0	5	4	4	2	4	4	5	3	4	5	5	4	4	3	3	4	3	4	4	3	4	4	4	1	4															4	4	3	4	4	4	1	4	5	1
0	4	5	4	4	4	5	4	4	5	4	4															5	4	5	4	5	4	4	5	5	4	2	2	4	2	5	5	5	5	4	5	4	4	4	3
0	4	4	4	4	4	4	4	5	4	4	4	4	4	4	3	4	4	2	4	4	3	5	5	2	5															5	5	5	5	5	5	1	5	5	1
0	5	5	5	2	4	5	5	4	5	5	5															5	5	5	5	4	5	2	4	5	1	5	5	1	5	5	5	5	5	4	5	1	4	5	1
0	4	4	4	3	4	4	4	4	3	2	4	3	3	3	4	4	3	2	4	3	2	4	4	2	4															3	4	3	4	4	3	2	4	3	2
0	5	5	4	4	3	5	2	4	4	2	5	4	2	3	3	3	3	3	3	3	2	3	4	2	4	4	4	4	4	3	4	4	4	4	4	5	5	2	5
0	4	4	4	4	4	4	2	4	4	4	4															4	4	4	4	4	4	4	4	4	4	4	4	2	4	4	4	4	3	4	4	2	4	4	4
0	5	5	5	5	5	5	4	5	5	4	5	5	4	5	4	5	5	4	5	4	4	4	5	2	4	5	5	4	5	5	5	4	5	5	4	5	5	2	5
0	3	3	4	3	4	4	4	4	4	4	4	4	2	3	3	2	4	2	3	4	2	4	4	2	4															2	3	4	3	2	4	2	3	4	2
0	4	3	3	3	3	4	4	3	4	4	3															4	4	4	4	3	4	3	3	3	4	3	4	4	3	3	3	4	4	4	4	4	4	3	4
0	5	5	5	5	5	5	4	5	5	4	5															5	5	5	1	5	5	1	5	5	1	5	5	1	5	5	5	3	5	5	4	5	5	3	3
0	4	5	5	5	4	5	4	4	5	4	5	3	4	4	4	4	4	4	3	3	4	3	4	2	4	4	4	5	3	4	4	4	4	4	4	5	5	2	5
0	4	4	4	5	4	4	3	4	4	3	4															3	5	4	5	4	5	2	4	4	1	5	5	1	5	5	5	4	4	4	4	2	4	4	2
0	5	5	5	2	3	5	2	4	5	2	5															5	1	5	5	3	5	2	4	5	1	5	5	1	5	1	3	5	2	4	5	2	4	5	2
0	5	5	5	3	5	5	5	5	5	4	5															5	5	5	5	5	5	1	5	5	1	5	5	1	5	5	5	5	5	5	5	1	5	5	1
0	5	5	5	5	5	5	5	5	5	5	5															5	5	5	1	5	5	5	5	5	5	5	5	1	5	5	5	5	5	5	5	1	5	5	1
0	3	4	3	2	4	4	4	4	4	4	4	2	3	2	3	3	2	3	3	2	4	3	3	2	3															4	3	3	3	3	4	2	3	3	3
0	5	5	5	5	4	5	4	4	5	4	5															5	5	5	5	5	5	5	5	5	5	5	5	1	5	5	5	5	5	5	5	3	5	5	5
0	4	4	4	4	4	4	4	4	4	4	4															4	4	4	4	4	4	4	4	4	4	4	4	2	4	4	4	4	2	4	4	2	4	4	2
0	4	4	4	5	4	4	5	4	4	4	3	4	5	4	4	4	5	4	5	4	4	5	5	2	5															4	4	4	4	5	3	4	4	3	4
0	4	4	4	5	3	5	5	4	4	5	4	4	4	4	4	4	4	2	4	4	2	4	5	1	4															4	5	4	5	4	4	2	4	4	2
0	4	4	5	4	4	5	5	4	5	4	5	3	4	3	3	4	3	4	4	3	2	4	4	1	4															3	5	3	4	4	4	2	4	3	2
0	5	5	5	4	5	5	5	5	5	5	5															4	5	5	5	4	5	1	4	5	1	5	5	1	5	5	5	5	5	5	5	2	5	5	2
0	1	4	2	4	1	2	3	2	1	4	2	2	3	3	4	3	5	4	5	2	4	5	4	3	2	4	4	4	4	5	1	3	5	4	3	3	4	5	2
0	1	1	1	1	5	1	1	1	1	1	1	1	1	1	1	1	1	1	1	1	1	1	1	5	1															1	1	1	1	5	1	1	1	1	1
0	4	5	3	5	3	3	3	3	4	4	4															4	4	4	5	3	3	4	3	4	5	4	4	2	4	3	5	1	5	3	3	5	3	3	5
0	4	3	3	2	4	4	4	4	4	4	4	4	3	3	4	4	4	2	4	4	2	4	4	2	4	4	5	5	4	4	4	3	4	4	2	4	4	2	4
0	5	5	5	5	5	5	2	5	5	2	5	5	5	5	5	5	5	1	5	5	1	4	4	1	4	5	5	5	5	5	5	1	5	5	1	5	5	1	5
0	5	5	5	3	5	5	5	5	5	5	5															5	5	5	5	5	5	1	5	5	1	5	5	1	5	5	5	5	5	5	5	1	5	5	1
0	5	2	4	4	4	4	4	4	4	5	3	5	3	5	5	5	5	4	4	5	2	4	4	4	4															4	4	4	4	5	4	4	4	4	4
0	5	5	5	4	3	5	3	3	5	2	5	5	3	5	1	5	5	1	4	5	1	5	5	1	5															5	1	5	5	3	5	1	2	5	1
0	5	5	5	5	5	5	1	5	5	1	5															4	4	4	4	5	4	1	4	4	2	4	4	1	5	5	2	4	3	5	4	1	5	5	1
0	5	5	5	4	5	5	5	4	5	5	5															5	5	5	5	4	5	4	3	5	2	5	5	1	5	5	5	5	5	5	5	5	3	5	4
0	5	4	4	5	3	5	4	5	4	5	4	4	5	4	3	5	5	2	5	5	1	5	5	1	5															4	3	3	3	4	5	1	4	5	1
0	5	5	4	4	4	5	4	5	5	4	5	4	4	4	4	4	4	2	4	4	2	4	4	2	4	3	5	4	5	4	4	2	4	4	2	4	4	2	4
0	5	5	5	5	5	5	5	5	5	5	5	5	5	5	1	5	5	1	5	5	1	5	5	1	5															5	5	5	1	5	5	1	5	5	1
0	3	4	3	3	3	4	3	3	3	2	4	2	2	2	2	2	2	2	2	2	3	3	2	3	2															3	3	1	3	1	1	3	3	1	3
0	3	5	4	4	2	5	2	3	5	2	5	3	3	4	3	4	4	1	4	3	2	4	4	1	4															3	5	3	5	3	3	4	3	3	3
0	5	5	4	5	4	5	5	5	5	5	5															5	5	5	5	5	5	5	5	5	5	5	5	1	5	5	5	5	5	5	5	5	5	5	5
0	3	3	4	1	5	5	4	5	3	5	4	2	5	3	1	5	4	2	3	3	5	4	5	2	3															4	3	3	4	4	3	3	5	5	4
0	4	5	3	3	4	4	4	4	4	4	4	4	4	3	4	4	4	2	4	3	2	4	5	1	5	4	5	4	4	4	4	2	4	4	2	4	4	2	4
0	4	5	3	4	3	4	2	4	5	2	5	3	3	3	3	3	3	2	3	3	2	4	4	2	3															5	4	3	4	4	4	2	3	4	1
0	4	4	4	3	3	4	3	3	4	3	4	4	3	4	3	4	4	2	4	4	2	5	5	1	5	4	4	4	4	4	4	2	4	4	2	5	5	2	5
0	3	3	1	4	4	4	2	3	4	3	2	3	3	3	3	4	3	3	3	4	4	3	3	3	4															3	3	2	2	4	2	4	3	4	3
0	3	5	4	4	3	5	5	3	5	4	5															3	5	4	5	4	5	1	4	5	1	5	5	1	5	3	5	4	5	4	5	1	4	4	1
0	3	5	3	5	2	4	4	2	4	2	5	3	3	4	4	3	4	1	4	4	1	4	4	1	5															3	1	4	1	3	4	1	3	4	1
0	1	2	1	5	5	2	2	4	2	2	2	1	2	1	1	2	1	2	3	1	1	1	2	3	1	2	2	1	1	2	3	2	3	2	2	3	3	2	4
0	4	4	3	2	4	4	3	4	4	2	4	4	3	3	2	3	3	2	4	4	2	4	4	2	5	4	4	4	4	4	4	2	4	4	2	5	5	1	5
0	4	5	2	4	3	4	4	4	3	2	4															4	4	3	5	3	3	2	4	3	2	4	4	2	5	2	4	1	3	3	2	4	3	1	2
0	4	5	5	4	4	5	4	4	5	4	4	4	3	3	3	4	4	3	4	3	3	3	4	2	4	4	4	4	4	4	4	2	4	4	3	4	4	2	4
0	4	5	5	4	3	5	4	3	5	4	4															4	5	4	5	4	5	3	4	5	3	5	5	2	5	4	5	5	5	4	5	2	4	4	3
0	5	5	5	5	5	5	5	5	5	5	5															5	5	5	5	5	5	5	5	5	5	5	5	5	5	5	5	5	5	5	5	5	5	5	5
0	3	4	3	5	3	4	2	4	4	3	5	3	4	3	4	4	4	3	4	3	3	3	3	2	4	5	5	5	5	5	5	2	5	5	2	5	5	1	5
0	5	5	4	4	4	5	4	4	5	4	5	4	5	3	4	4	4	2	4	4	2	4	4	1	4	4	5	4	4	4	4	2	4	4	2	5	5	1	5
0	4	5	4	3	3	4	4	4	4	4	4	3	4	3	4	4	3	3	4	3	2	4	3	2	4	3	4	3	3	4	4	2	4	4	2	4	4	2	4
0	5	5	5	3	4	5	3	4	5	3	5															4	4	3	2	3	4	4	3	4	4	4	4	2	4	4	4	4	2	4	4	3	3	4	3
0	5	5	5	4	2	5	4	4	5	5	5	5	5	5	5	4	5	1	4	5	1	5	5	1	5	4	4	2	5	3	5	2	4	5	2	5	5	1	5
0	4	4	3	4	3	4	4	3	3	4	4															4	4	4	4	3	4	3	3	4	4	4	4	2	4	3	3	3	3	3	3	3	3	3	2
0	4	5	4	5	4	4	4	4	4	4	4	4	4	4	4	4	4	3	4	4	4	4	4	2	4	3	4	4	5	4	4	4	4	4	4	4	4	2	4
0	4	3	4	2	3	4	4	4	4	4	5															4	4	4	3	4	4	3	4	3	2	5	5	1	5	4	4	4	4	4	4	2	4	4	2
0	5	5	4	4	4	4	4	4	4	4	5															5	4	4	4	3	4	3	4	4	2	4	5	1	4	5	4	5	1	4	5	2	4	5	2
0	5	5	4	5	5	5	4	5	4	3	5	3	4	3	2	5	5	2	5	4	2	5	5	1	5															4	5	3	5	5	5	2	5	4	2
0	4	5	3	4	4	4	4	5	4	5	4	4	4	3	4	4	4	2	4	3	2	3	3	2	4															4	4	3	4	3	4	3	3	3	3
0	5	5	5	5	5	5	1	5	5	1	5															5	5	5	5	5	5	1	5	5	1	5	5	1	5	5	1	5	1	5	5	1	5	5	1
0	5	5	5	5	5	5	5	5	5	5	5															5	5	5	5	5	5	1	5	5	1	5	5	1	5	5	5	5	5	5	5	1	5	5	1
0	4	4	2	3	2	3	4	3	3	3	4	2	3	2	2	2	3	4	2	2	3	3	3	1	4	3	3	1	3	2	2	4	2	2	4	3	3	2	4
0	3	4	4	1	4	4	5	4	4	5	4															3	4	4	4	4	4	2	4	4	2	5	5	1	5	3	4	4	4	4	4	2	4	4	2
0	3	2	4	2	4	1	2	2	3	3	1	3	4	2	3	3	4	2	1	2	2	3	2	2	1															2	1	4	3	2	2	1	3	3	4
0	1	1	1	2	4	1	1	4	1	1	1	1	1	1	1	4	1	1	4	1	1	1	1	5	1	4	2	2	2	4	4	1	4	4	1	4	4	2	4
0	4	5	4	5	4	5	4	5	4	5	4	4	5	2	4	5	3	5	4	4	4	4	4	2	5															4	4	2	5	4	3	4	4	4	4
0	5	3	1	3	1	4	1	5	1	3	4															1	1	1	3	1	4	4	1	3	4	4	3	4	3	5	3	3	1	5	2	1	4	1	2
0	3	3	3	3	3	3	3	3	3	3	3	3	3	3	3	3	3	3	4	4	2	4	4	2	4	3	3	5	3	4	5	2	4	5	3	5	5	1	5
0	4	3	3	4	4	4	3	4	4	4	4	3	4	3	3	4	4	2	4	3	2	4	4	2	4	4	4	5	5	5	4	3	4	4	3	4	4	2	4
0	5	5	5	4	4	5	3	4	5	3	5															5	4	5	4	5	5	2	5	5	1	5	5	1	5	5	4	3	3	4	3	1	4	3	2
0	5	5	5	5	5	5	4	4	5	4	5															4	4	4	4	5	5	4	4	4	3	3	5	2	4	5	5	4	4	5	4	2	4	4	2
0	4	3	4	4	4	4	5	4	4	4	4	1	3	1	3	3	2	2	3	2	3	3	3	2	3	2	3	2	3	4	3	4	4	4	3	3	4	2	4
0	5	5	5	5	5	5	5	5	5	5	5	4	5	5	3	5	4	5	2	3	3	3	2	3	3	4	5	5	4	4	5	3	5	5	5	4	4	3	5
0	4	5	4	4	4	5	5	4	5	4	5	5	5	5	5	5	5	4	5	5	4	5	5	2	4	5	4	4	4	4	3	3	4	3	4	5	5	2	5
0	4	5	4	4	4	5	4	4	5	4	5	4	4	4	3	3	4	3	4	4	3	4	4	1	4															4	4	4	4	3	4	2	4	4	2
0	4	5	3	5	4	4	4	4	4	3	4	2	3	4	3	3	4	3	3	4	2	4	4	2	4	4	3	4	4	4	4	2	3	4	2	4	4	2	4
0	5	5	5	5	5	5	5	5	5	5	5	5	5	4	4	4	4	2	2	4	4	5	5	2	5															5	2	5	2	2	5	5	4	5	2
0	3	4	3	3	3	4	4	3	4	4	4	4	4	4	3	3	3	3	3	4	3	4	4	2	4	3	4	4	4	3	4	2	3	4	2	4	4	2	4
0	4	4	4	4	4	5	4	4	4	5	5	4	4	4	4	4	4	4	4	4	4	4	4	4	4	5	5	5	5	5	5	5	5	5	5	5	5	5	5
0	5	5	4	4	4	5	2	3	4	2	4	4	4	4	4	4	4	2	4	4	2	4	4	2	4															4	4	4	2	4	4	2	4	4	2
0	4	5	4	3	4	4	2	3	4	2	5															4	4	4	2	4	4	2	4	4	2	4	4	1	4	4	4	4	4	4	4	2	4	4	2
0	4	5	4	5	5	5	5	5	5	2	5	4	4	3	4	5	4	2	5	4	2	4	4	1	4															4	4	4	4	4	4	2	4	4	3
0	4	4	3	5	3	3	5	3	3	5	4	2	4	1	4	1	2	5	5	1	5	2	2	3	2															4	4	1	5	2	3	5	2	4	2
0	5	5	5	2	4	5	4	4	5	3	5															5	2	4	5	4	5	2	4	4	1	5	5	1	5	5	4	4	4	4	5	2	4	4	4
0	5	5	5	5	5	5	5	5	5	5	5	4	5	5	5	4	5	5	5	4	3	5	5	1	5															5	5	5	5	4	5	1	5	5	1
0	2	2	2	4	2	3	4	2	2	4	3	2	2	2	4	2	2	4	2	2	4	2	2	3	2															3	3	2	3	2	2	3	2	2	3
0	4	4	4	4	3	5	2	3	4	2	4	4	4	4	3	4	4	2	4	4	2	4	4	2	4	4	3	4	2	4	4	2	4	4	2	4	4	2	4
0	1	1	1	3	3	1	3	3	2	3	2	2	2	1	2	3	2	2	3	2	2	2	2	4	2															1	1	1	1	3	1	1	3	1	1
0	5	4	5	4	5	4	5	4	4	5	4	4	5	4	5	5	4	3	4	5	4	5	5	4	5	4	5	4	5	5	4	5	4	4	5	5	4	5	4
0	3	2	3	3	3	3	3	3	3	3	3	3	2	2	3	3	2	2	3	3	3	2	3	3	3															3	3	3	3	3	3	3	3	3	3
0	4	5	4	4	5	5	5	5	5	4	5	4	5	4	5	4	4	4	4	4	4	5	5	1	5	5	5	5	5	5	5	2	5	5	2	5	5	1	5
0	5	5	5	4	4	5	5	4	5	5	5	4	5	4	4	4	4	2	4	5	2	5	5	1	5	4	5	5	5	4	5	1	4	5	1	5	5	1	5
0	4	5	4	5	4	4	5	4	4	3	5															5	4	4	4	5	5	3	5	5	3	5	5	1	5	4	5	4	4	5	4	1	5	4	1
0	5	5	5	5	5	5	5	5	5	5	5	5	5	5	5	5	5	5	5	5	5	5	5	5	5															5	5	5	3	5	5	5	5	5	1
0	3	5	5	4	3	4	3	4	5	5	4	3	3	4	3	3	4	2	3	3	3	4	4	2	4	4	3	4	4	3	4	2	3	3	2	4	5	4	4
0	5	4	4	3	5	5	4	4	5	3	5															5	4	5	4	4	5	2	3	4	1	5	5	1	5	5	4	4	2	4	4	1	4	4	1
0	5	5	5	3	5	5	2	5	5	5	4	5	5	5	5	5	5	1	5	5	1	5	5	1	5	5	4	5	5	5	5	5	5	5	1	5	5	1	5
0	5	5	5	5	4	5	4	5	5	4	5	2	4	4	4	4	4	2	4	4	2	4	5	1	4															3	5	4	3	4	4	2	4	4	2
0	4	4	4	4	4	4	4	4	4	4	4	4	4	4	4	4	4	4	4	4	4	4	4	2	4															4	4	4	4	4	4	2	4	4	2
0	4	5	4	4	3	5	4	3	5	4	4	4	4	3	3	4	4	3	2	4	3	4	4	1	5	5	5	5	4	4	5	2	3	4	2	5	5	1	5
0	3	2	2	5	4	4	2	3	4	2	3	2	2	2	2	2	2	2	2	2	4	2	2	4	2															2	4	2	4	3	2	3	2	3	3
0	5	5	4	4	4	5	5	4	5	5	4															4	5	4	1	5	4	2	5	5	2	5	5	1	5	5	4	3	1	4	4	1	4	4	1
0	4	5	4	3	4	4	5	4	4	5	4	4	4	4	4	4	4	4	4	4	2	5	5	1	5	4	4	5	4	4	5	4	4	5	1	5	5	1	5
0	4	4	5	3	3	4	4	3	5	4	3	4	3	3	4	3	4	2	3	4	2	4	4	4	4															4	3	4	3	2	3	3	3	3	3
0	4	4	4	2	4	4	4	4	4	4	4															4	5	4	3	4	4	4	4	4	4	4	4	2	4	4	4	4	4	4	4	4	4	4	2
0	4	5	4	5	4	5	5	4	5	4	4	5	5	4	5	5	5	1	5	4	1	5	5	1	5															4	3	2	3	4	4	3	4	4	2
0	3	4	3	3	4	4	4	4	4	4	4															3	4	3	4	4	4	4	4	4	2	4	4	2	4	2	4	3	4	4	4	2	4	4	3
0	5	5	3	4	4	5	4	4	5	2	5	5	4	3	3	3	4	1	4	3	2	4	5	5	5	5	4	3	4	4	5	2	4	5	4	5	5	2	5
0	4	3	3	4	3	4	5	3	4	4	4															4	4	3	5	4	4	1	4	4	1	5	5	1	5	3	4	2	4	3	2	1	3	3	2
0	4	4	3	2	2	3	4	2	3	4	4															4	2	3	2	2	4	4	2	4	3	5	4	2	4	4	3	3	2	2	3	3	2	3	3
0	3	4	3	4	3	3	4	4	4	4	4	3	4	2	4	4	3	4	4	3	4	4	5	1	4	3	4	3	4	4	3	2	3	4	2	5	5	1	5
0	3	4	3	4	3	3	4	4	3	4	4															4	4	4	4	4	4	2	4	4	2	5	5	2	4	4	4	3	4	4	4	2	3	4	2
0	4	4	4	3	4	5	3	4	4	4	4	3	4	3	3	4	4	2	4	4	2	3	5	2	4	2	4	3	4	4	4	3	4	4	3	5	5	2	5
0	3	4	3	3	4	4	4	4	4	3	3	2	3	2	3	3	3	3	3	4	2	3	4	2	3	4	4	4	4	4	4	2	4	4	2	5	5	1	5
0	5	5	4	5	4	3	5	5	4	5	5	5	2	4	3	5	5	2	5	4	2	5	5	1	5	5	5	5	5	5	5	5	5	5	1	5	5	1	5
0	3	5	4	5	2	4	4	3	5	2	5	2	4	2	4	4	4	3	4	4	2	4	4	2	4	4	4	4	4	3	4	2	4	4	2	4	4	2	4
0	3	5	1	4	4	3	5	4	3	5	3															3	4	2	4	4	4	5	4	3	4	5	5	1	5	1	2	1	2	4	2	5	4	1	3
0	3	4	3	4	3	4	4	4	5	4	5	3	4	3	4	3	3	2	4	4	2	4	5	1	3	4	4	4	4	4	4	2	4	4	2	5	5	1	5
0	5	5	5	5	5	5	4	5	5	4	5	4	5	5	5	5	5	4	5	5	3	5	5	1	5	5	5	5	5	5	5	1	5	5	1	5	5	1	5
0	5	5	4	4	4	5	4	5	4	4	5	4	4	4	4	4	4	2	4	4	2	4	4	2	4	4	4	5	5	5	5	1	5	5	2	5	5	1	5
0	5	5	5	5	5	5	2	5	5	2	5															4	4	3	5	5	5	3	5	4	2	4	4	2	4	4	4	3	4	4	4	2	5	4	2
0	5	4	5	4	4	5	4	4	4	4	5	4	4	4	4	4	4	2	2	4	4	4	4	2	4	4	4	5	4	4	4	2	4	4	2	4	4	2	4
0	5	5	5	3	5	5	5	1	5	5	4	5	3	5	3	5	5	2	5	5	3	5	5	1	5	5	4	5	3	5	5	1	5	5	1	5	5	1	5
0	3	3	2	4	2	4	2	2	4	3	4	2	2	2	2	1	2	2	3	2	2	3	3	2	3															2	2	2	2	1	2	2	2	2	2
0	4	5	4	5	4	4	4	4	4	4	4	2	2	2	3	4	2	4	4	2	3	2	2	3	2															2	3	2	3	4	3	2	4	2	2
0	3	4	3	4	4	3	4	4	3	4	4															4	4	3	5	4	4	2	4	4	4	5	5	1	5	4	3	4	3	4	4	2	4	4	2
0	4	5	4	3	3	5	3	4	5	4	5	4	3	3	3	3	4	2	3	4	2	4	4	2	4															4	4	3	3	3	4	2	3	4	2
0	4	4	4	4	3	4	4	4	4	4	4	4	4	4	4	4	4	4	4	4	4	4	4	2	4															4	4	4	4	4	4	2	4	4	2
0	4	4	4	2	3	5	2	4	4	2	4	4	2	4	2	4	4	2	3	4	2	4	4	3	4	4	2	4	2	4	4	2	2	4	2	4	4	2	5
0	4	5	5	4	3	5	4	4	5	2	5															4	5	4	4	4	4	4	4	4	3	4	4	2	4	4	4	5	2	4	5	3	4	5	3
0	3	2	1	5	4	2	4	3	4	3	2	4	3	5	4	5	2	2	1	1	3	5	2	4	3	3	4	2	3	4	1	5	2	5	5	4	3	5	2
0	2	2	2	4	2	2	4	2	4	4	4	2	2	2	2	2	4	2	2	2	2	4	4	2	4															2	2	2	2	2	2	2	2	2	2
0	4	4	3	4	4	4	4	4	4	4	4	3	4	4	3	4	4	4	4	4	4	4	4	2	4															4	4	4	4	4	4	4	4	4	4
0	5	3	5	5	4	5	5	4	5	5	5	4	5	3	5	3	5	5	5	3	5	5	4	5	5	5	5	5	5	5	5	5	5	5	5	5	5	5	5
0	5	5	5	5	5	5	5	5	5	5	5	3	3	3	3	3	3	3	3	3	3	4	4	3	3															3	3	3	3	3	3	3	3	3	3
0	4	5	4	5	4	5	4	4	4	4	4	4	4	4	3	4	4	2	4	4	2	5	5	1	5	4	5	5	2	4	4	2	4	5	1	5	5	1	5
0	5	4	4	3	4	4	3	3	4	4	4	4	4	5	2	4	4	2	4	4	3	4	4	2	5	5	4	5	5	4	5	4	4	5	4	5	5	1	5
0	4	5	3	2	3	4	3	4	4	3	4	4	3	2	4	5	3	4	4	3	4	4	4	2	5															2	3	3	3	4	4	4	3	4	4
0	4	5	5	2	3	5	4	3	4	4	5	1	2	2	2	3	4	2	3	2	2	4	4	2	4															3	4	1	3	3	1	3	3	1	2
0	4	4	4	4	3	4	5	3	4	5	5															4	3	4	5	3	5	1	3	5	1	5	5	1	5	4	4	3	4	3	4	1	3	4	1
0	3	4	5	4	3	5	4	3	5	4	5															3	4	3	4	4	4	3	3	4	3	5	5	5	5	3	4	3	4	3	4	2	3	4	3
0	4	4	4	4	4	4	4	4	4	4	4															5	5	5	5	5	5	2	4	5	2	5	5	1	5	4	5	4	5	4	4	2	4	4	2
0	5	5	5	5	5	5	1	5	5	1	5	5	5	5	4	5	5	1	5	5	1	5	5	1	5															5	5	5	5	5	5	1	5	5	1
0	4	5	5	4	5	5	4	4	5	5	5	4	4	4	3	4	4	2	4	4	2	5	5	1	5															4	3	5	3	4	4	1	4	4	2
0	3	5	3	3	3	4	3	2	4	4	5															3	3	3	3	3	3	3	3	4	3	3	3	3	3	3	3	3	3	3	3	3	3	3	3
0	4	5	4	4	5	4	5	4	4	5	4	4	5	4	5	5	4	5	4	4	4	4	5	1	5	5	5	5	4	5	5	1	5	5	1	5	5	1	5
0	3	4	2	2	3	3	4	5	1	5	3	5	4	3	2	4	2	3	3	3	4	3	3	5	4															4	3	2	2	3	3	4	4	3	3
0	3	5	3	4	3	4	5	3	4	4	4															3	4	3	4	4	4	3	3	4	2	4	4	1	4	3	4	3	4	3	3	3	3	3	4
0	3	4	3	4	3	4	2	3	4	3	4	3	3	3	3	3	3	3	3	3	3	3	3	3	3	3	3	3	3	3	3	3	3	3	3	3	3	3	3
0	4	2	2	2	2	3	5	3	4	2	4	1	2	2	2	4	3	2	4	2	4	4	4	3	4															5	2	2	1	4	4	5	4	4	5
0	5	5	5	5	5	5	1	5	5	1	5	5	5	4	4	4	5	2	5	5	1	5	5	1	5	5	5	4	5	5	5	1	5	5	1	5	5	1	5
0	5	5	5	5	3	5	4	4	5	4	4	3	3	4	4	3	5	5	4	5	3	3	3	3	3															4	4	5	5	5	4	2	4	4	2
0	3	4	3	4	4	4	4	4	4	3	4	3	3	3	3	4	4	2	3	4	3	4	4	2	4															4	3	3	2	4	4	2	3	3	3
0	5	5	5	5	5	5	5	5	5	5	5	4	5	5	5	5	5	2	5	5	2	5	5	1	5	5	5	5	5	5	5	1	4	5	1	5	5	1	5
0	4	5	4	4	4	4	5	4	4	5	4	4	4	5	4	5	5	2	5	4	2	5	5	1	5	3	4	4	4	5	4	2	4	5	2	5	5	1	5
0	4	4	4	4	4	4	4	4	4	4	5	3	4	4	4	4	4	4	4	4	2	3	4	1	4	4	4	4	4	4	4	3	4	4	3	4	4	1	4
0	3	4	3	3	3	4	4	4	4	4	3															3	3	4	3	4	4	2	4	4	2	4	4	2	4	3	3	3	3	4	3	2	3	3	2
0	5	5	2	2	3	5	5	4	4	4	5	5	2	3	2	5	5	4	3	5	4	3	5	1	5	5	2	5	4	5	5	4	5	4	4	1	3	5	5
0	3	4	3	3	4	3	3	4	3	3	4															4	3	4	3	4	4	3	4	4	3	5	5	2	5	3	3	3	3	4	4	3	4	3	2
0	4	5	4	4	4	4	2	4	5	2	5	4	4	3	4	3	3	2	4	3	2	3	3	2	4															4	3	3	4	4	3	2	3	2	2
0	2	3	2	4	3	4	2	4	3	2	4															2	3	3	3	2	3	2	4	3	2	4	4	2	4	3	4	2	3	2	3	2	2	2	2
0	3	4	3	4	3	4	3	3	4	2	5	3	2	4	2	2	3	2	2	3	2	4	4	2	4															3	4	3	2	3	3	2	2	3	2
0	5	5	4	2	3	4	4	3	5	3	5	4	3	3	3	3	4	2	4	4	2	4	5	1	4	4	4	3	4	3	4	4	3	4	4	4	5	1	4
0	4	5	4	3	4	4	4	4	4	3	4	4	3	4	3	4	4	3	4	4	3	4	4	2	4	4	4	4	4	4	4	2	4	4	2	4	4	2	4
0	4	4	4	5	4	5	5	4	4	5	5	5	3	4	3	4	5	1	5	5	1	5	5	1	5															4	4	4	4	4	5	1	5	4	1
0	5	4	4	4	4	5	5	3	5	5	4															5	5	5	4	4	5	2	4	5	2	5	5	1	5	5	5	3	5	4	5	2	4	4	3
0	5	5	4	5	5	5	4	5	5	3	5	5	5	5	5	5	5	1	5	5	1	5	5	1	5															5	5	4	5	5	5	3	5	5	1
0	3	4	2	3	3	3	4	3	3	4	4															3	4	3	4	3	3	1	3	3	1	4	5	1	4	3	4	2	4	3	4	2	3	3	2
0	5	5	5	5	4	5	4	5	5	4	5	3	4	3	4	4	3	4	5	4	4	3	4	2	4															4	4	3	4	4	3	4	4	3	4
0	3	3	3	3	3	3	3	3	3	4	3	3	2	2	2	2	3	3	3	2	3	3	2	3	3															3	3	3	3	3	3	3	3	3	3
0	3	4	3	4	4	3	2	4	4	3	4	2	3	3	3	3	3	2	3	3	2	3	3	2	3	4	3	3	3	3	3	3	3	3	4	4	4	2	4
0	4	5	4	3	4	4	4	4	5	4	5	3	4	3	3	4	3	1	4	3	1	4	4	2	4	5	5	5	1	5	5	1	5	5	1	5	5	1	5
0	4	4	3	4	4	4	4	4	4	3	4	4	4	4	2	4	4	2	3	4	4	4	4	2	4															2	4	4	4	3	4	2	3	4	4
0	5	3	3	4	3	3	4	4	4	3	4	4	4	3	2	4	4	3	4	4	2	5	5	1	5															4	2	3	2	4	4	2	4	4	2
0	5	5	3	3	3	4	5	4	5	5	5	4	4	3	4	3	4	2	3	4	2	4	4	1	4	3	4	3	4	3	4	2	2	4	2	5	4	1	5
0	4	4	3	3	4	4	4	4	4	4	4	3	4	3	4	4	4	4	4	4	3	4	3	5	4															3	4	3	4	3	4	2	3	3	2
0	3	4	4	4	4	4	4	4	4	4	3															4	5	5	5	5	5	4	5	5	5	3	4	4	4	4	4	4	4	4	4	4	4	4	5
0	3	5	4	2	3	5	5	4	4	5	5	2	3	3	3	2	3	3	3	3	3	4	3	3	4															2	3	3	4	3	3	2	1	2	2
0	3	3	1	5	2	2	1	3	4	2	2	4	3	3	5	4	3	4	2	3	2	2	2	4	3	3	4	2	2	2	5	3	3	3	1	5	3	2	4
0	4	4	5	3	4	3	4	4	3	3	4															4	3	3	3	4	3	5	4	3	3	5	4	2	5	4	4	4	4	4	3	3	3	4	3
0	4	4	3	4	4	4	4	3	4	4	4															4	4	4	2	4	4	3	2	4	2	4	4	2	4	4	4	4	2	4	5	4	2	4	5
0	2	2	1	3	2	2	3	2	2	2	3	1	2	1	2	2	1	4	2	1	2	1	1	5	1	3	3	3	2	2	3	2	2	3	3	4	4	2	4
0	4	4	3	4	3	4	4	4	4	4	4															4	4	3	4	4	4	3	3	4	4	4	4	3	4	3	4	3	3	4	3	3	3	3	3
0	4	4	4	3	3	5	5	3	4	5	5	4	3	3	2	4	3	2	3	3	2	4	4	2	4	3	2	4	4	3	4	2	3	4	4	5	4	2	5
0	4	5	4	5	3	4	5	3	4	5	5	3	4	3	3	3	4	2	3	4	2	5	5	1	5	4	4	3	4	3	4	2	3	4	2	4	4	1	5
0	4	4	4	2	3	4	5	4	4	5	4	4	4	3	4	4	4	2	4	3	2	4	5	1	5	3	4	4	4	3	4	4	3	4	4	4	5	1	5
0	3	4	2	5	2	3	2	2	3	2	3	2	2	2	2	2	3	4	2	3	3	4	4	2	3	4	5	5	5	4	5	1	4	5	1	5	5	1	5
0	2	3	2	3	4	2	4	4	2	4	4	2	2	2	2	4	4	4	4	2	4	3	3	2	3															2	4	2	4	4	2	2	4	2	2
0	3	5	4	4	4	5	4	5	5	4	5	2	3	2	2	4	4	1	5	4	1	5	5	1	5	2	4	2	4	3	5	1	5	4	2	5	5	1	5
0	5	5	5	5	5	5	5	5	5	5	5	5	5	5	5	5	5	5	5	5	5	5	5	5	5															5	5	5	5	5	5	5	5	5	5
0	3	5	2	5	1	4	5	1	4	4	4	3	5	2	4	1	2	1	1	2	1	3	3	3	4	5	1	5	5	1	5	1	1	5	1	5	5	1	5
0	4	4	4	2	4	4	3	4	4	4	4	4	4	4	4	4	4	2	4	4	2	4	4	2	4															4	4	4	4	4	4	4	4	4	2
0	4	5	5	4	3	5	3	4	5	3	5	5	5	5	5	3	5	1	4	5	1	5	5	2	4	5	2	4	3	3	5	1	3	5	1	5	5	1	5
0	3	5	3	4	4	3	4	5	3	4	4	3	2	5	2	4	5	2	5	3	2	4	4	1	4															3	3	3	2	4	4	1	5	4	1
0	3	2	4	3	2	3	4	3	1	3	2	2	1	1	3	3	4	3	3	3	2	4	3	2	2	3	3	3	3	2	4	3	3	3	2	2	3	2	3
0	4	5	4	4	4	5	4	4	5	4	5	3	4	3	4	3	3	4	4	3	4	3	3	2	4	4	4	4	4	4	4	2	4	4	3	5	5	1	5
0	3	3	3	4	2	3	4	2	3	4	4	3	3	3	3	2	3	3	2	3	3	4	4	2	4															3	3	3	3	2	3	3	2	3	3
0	5	4	4	2	4	5	5	3	4	5	5	3	3	2	3	3	4	2	3	4	2	4	4	1	4															3	5	4	3	3	4	2	3	4	2
0	4	4	3	2	3	4	4	4	4	4	4	3	4	2	4	3	2	4	3	3	4	3	3	2	3															3	4	3	4	4	4	2	4	2	2
0	5	5	5	4	5	5	2	4	5	4	5	4	4	5	4	3	5	2	4	5	2	5	5	1	5	4	5	4	3	5	5	3	5	5	1	5	5	1	5
0	4	4	5	3	4	5	4	4	5	3	5	5	4	5	4	4	5	2	4	5	2	5	5	1	5															4	4	4	4	4	4	2	4	4	2
0	4	4	4	3	3	4	4	3	4	4	4	5	4	5	2	4	4	2	3	5	3	5	5	2	5															4	4	4	4	3	4	2	4	4	2
0	3	5	2	4	2	3	5	2	3	5	5	2	4	2	4	4	3	4	4	3	4	4	4	2	3															2	5	2	5	4	3	5	3	3	3
0	4	4	4	4	4	4	2	4	4	2	4	4	3	4	3	4	4	2	4	4	2	4	4	2	4	4	4	4	4	4	4	2	4	4	2	4	4	2	4
0	4	5	4	2	4	4	4	4	4	2	4	4	4	4	4	4	4	4	4	4	2	4	4	2	4															4	4	4	4	4	4	2	4	4	2
0	4	4	4	5	3	4	5	4	4	4	4	2	2	2	2	3	2	2	3	3	2	3	3	2	3															3	3	2	3	3	3	1	3	2	2
0	4	4	4	3	4	4	4	4	4	4	4															4	3	3	4	4	4	2	4	4	2	5	5	1	5	3	2	2	2	4	3	2	3	2	2
0	4	5	4	3	5	5	3	4	4	4	5	5	2	4	3	4	5	2	5	5	2	5	5	1	5	3	3	3	4	4	5	2	4	4	2	4	4	1	4
0	4	5	4	4	4	4	4	4	4	4	4	2	3	2	3	3	2	3	3	2	2	2	3	2	2															4	3	4	3	3	3	3	3	3	2
0	4	3	3	2	2	5	3	4	2	3	4	4	3	3	2	3	4	2	4	3	2	4	4	2	5	4	4	3	3	3	3	3	2	3	4	5	5	2	3
0	3	3	3	5	3	3	3	3	2	3	4															4	2	3	2	3	3	3	4	4	3	4	2	3	5	4	3	4	3	3	3	3	3	2	3
0	4	5	4	5	3	5	5	5	4	5	4															5	5	5	4	3	5	2	4	4	2	5	5	1	5	4	5	4	4	4	4	2	4	5	2
0	3	4	3	3	4	4	4	4	4	4	4															3	3	3	3	3	3	4	4	3	4	4	4	2	4	3	3	3	2	4	3	4	3	3	4
0	4	5	4	5	4	5	5	3	5	5	5	4	4	5	4	5	5	4	4	5	5	5	5	5	5	5	3	3	5	5	5	3	4	5	5	4	4	4	4
0	4	5	4	2	4	5	4	4	5	4	5	3	4	4	4	4	4	2	4	4	2	5	5	1	5	4	5	4	4	4	4	2	4	5	2	5	5	1	5
0	3	3	4	3	5	3	3	4	4	5	2	5	3	3	3	1	3	1	3	3	4	5	3	3	4															3	1	3	1	3	1	4	4	5	3
0	1	3	3	3	5	3	5	5	5	5	5	5	5	5	5	3	3	5	3	4	5	5	5	5	5															5	5	5	4	5	4	5	5	4	5
0	5	5	5	4	5	5	3	5	5	4	5	5	5	5	5	5	5	1	5	5	1	4	5	1	4															5	5	5	5	5	5	3	5	5	1
0	5	5	5	5	4	5	4	5	5	4	5	4	4	3	4	4	4	3	4	4	3	4	4	2	4	4	4	3	4	3	3	4	3	3	4	4	4	2	4
0	4	3	3	3	1	4	2	3	1	5	1															1	5	3	4	4	1	3	4	1	2	3	4	3	4	4	3	3	4	4	5	4	3	5	4
0	5	4	5	4	4	5	3	4	5	2	5															5	3	5	4	4	5	3	4	5	2	4	4	2	5	5	4	4	3	4	5	2	5	4	2
0	4	4	4	5	4	4	4	5	4	4	5	4	4	3	4	4	4	2	4	4	3	4	4	2	3															4	4	3	4	3	4	2	3	3	2
0	5	5	5	2	5	5	2	4	5	4	5	3	4	3	5	5	3	2	4	3	5	3	3	2	4															3	2	2	5	5	2	4	4	4	2
0	3	3	3	3	3	3	3	3	3	3	3	3	3	3	3	3	3	3	3	3	3	3	3	3	3															3	3	3	3	3	3	3	3	3	4
0	5	5	5	4	4	5	4	5	5	2	5															4	5	3	4	4	4	5	4	4	4	5	5	1	5	5	5	4	5	4	5	5	4	4	5
0	4	4	4	3	4	4	4	4	4	2	4	4	4	4	4	4	4	4	4	4	2	3	4	4	3	4	4	4	4	4	4	4	4	4	4	3	4	2	4
0	5	5	5	4	4	5	4	4	5	4	5															5	4	5	2	4	5	2	4	5	2	5	5	1	5	5	3	4	3	3	4	2	3	4	3
0	4	5	4	4	4	4	2	4	4	3	5	3	4	4	2	4	4	2	4	3	2	4	4	2	5	4	4	4	2	4	5	2	4	4	2	5	5	1	5
0	3	3	3	4	3	4	4	3	4	4	4	2	2	2	2	2	2	2	3	2	2	3	2	3	3	3	4	2	4	3	4	3	4	4	2	4	4	2	4
0	4	3	4	2	3	3	4	4	4	4	4															4	4	4	4	4	4	2	4	4	2	5	5	1	5	5	4	4	4	4	4	2	5	4	2
0	5	5	5	5	5	5	5	5	5	5	5	5	5	5	4	5	5	2	5	5	2	5	5	1	5	5	5	5	1	5	5	2	5	5	2	5	5	1	5
0	4	4	4	3	4	5	4	4	4	4	4															5	4	5	5	4	4	2	4	5	2	5	5	1	5	5	4	5	3	4	5	2	4	4	2
0	3	4	2	3	3	4	2	4	4	2	4															4	4	4	4	4	4	2	4	4	2	4	5	1	4	2	3	2	4	3	2	2	3	2	2
0	5	5	4	4	4	5	3	4	5	3	5															4	3	3	3	3	4	4	4	3	3	4	4	4	4	4	5	3	5	4	4	2	4	3	3
0	4	4	4	5	4	4	4	4	5	4	4															4	5	5	2	4	4	2	4	4	2	5	5	1	5	5	5	3	2	3	4	2	4	3	4
0	4	5	4	4	4	4	3	3	4	2	5	3	4	4	2	3	4	2	3	3	2	5	5	1	5															4	3	4	3	3	4	1	3	5	2
0	5	5	5	2	5	5	5	5	5	5	5	4	3	4	3	5	5	5	5	4	3	4	5	1	5															4	2	3	2	4	4	1	5	4	2
0	4	5	4	3	3	5	4	4	4	4	4	4	4	5	3	4	4	3	4	5	1	4	5	2	4															4	3	4	3	4	4	2	4	4	2
0	3	4	4	5	4	4	2	4	4	2	4	4	3	5	3	4	4	1	4	4	2	4	5	1	4	4	4	2	1	4	5	2	4	4	2	5	5	1	4
0	4	4	4	2	4	4	4	4	4	4	4	4	4	4	4	4	4	2	4	4	2	4	4	1	4															4	4	4	4	4	4	2	4	4	2
0	4	5	5	3	5	5	4	4	5	5	5	4	4	5	4	3	4	2	3	4	5	4	5	1	5															4	4	5	3	4	4	1	4	4	1
0	5	5	5	3	5	5	2	4	5	4	5	4	4	5	4	4	5	1	4	5	1	5	5	1	5	4	4	4	4	4	5	2	4	4	2	5	5	2	5
0	5	5	5	5	5	5	5	5	5	5	5	5	5	5	5	5	5	5	5	5	5	5	5	1	5	5	3	3	5	3	3	5	5	3	3	3	3	3	3
0	3	3	3	3	3	3	3	3	3	3	4															4	4	4	4	3	4	2	3	4	2	4	4	2	4	2	3	3	3	3	2	3	3	3	3
0	3	3	3	3	3	3	3	3	3	3	1	3	3	3	3	3	3	3	3	3	3	3	3	3	3															3	3	3	3	3	3	3	3	3	3
0	4	4	4	4	4	4	4	4	4	4	4	4	4	4	3	4	4	3	4	4	3	4	4	2	4															4	3	4	2	3	4	2	3	4	2
0	4	4	3	4	4	5	4	5	5	4	5															2	5	2	5	4	2	4	4	2	4	5	4	2	4	4	5	2	5	4	4	2	4	4	2
0	4	4	4	4	4	4	4	4	4	4	4	4	4	4	4	4	4	4	4	4	4	4	4	4	4	4	4	4	4	4	4	4	4	4	4	4	4	4	4
0	4	5	3	2	4	4	3	4	3	3	5	1	2	2	2	4	3	2	4	1	4	2	3	2	3															4	3	3	3	3	4	2	3	4	2
0	4	4	2	2	2	3	2	4	5	2	4	4	5	3	2	5	3	4	4	2	2	5	4	2	4	2	5	3	2	2	4	4	2	2	4	2	4	5	4
0	4	4	4	4	4	4	5	4	5	4	4	4	3	4	3	4	4	4	3	4	2	5	5	2	5	5	4	4	4	5	4	2	4	5	2	5	5	1	5
0	3	4	3	3	3	4	4	3	4	4	4															4	4	3	4	3	4	4	3	4	4	4	4	2	4	4	4	3	4	3	3	3	3	3	3
0	5	5	5	3	5	5	5	5	5	5	5															5	5	5	5	5	5	4	5	5	4	5	5	2	5	4	5	5	5	5	5	4	5	5	4
0	5	5	5	5	5	5	3	5	5	3	5	5	4	5	5	5	5	4	5	5	3	5	5	1	5															5	5	5	5	5	5	1	5	5	2
0	3	3	3	1	2	4	5	3	4	3	4															4	3	3	4	2	4	4	3	4	2	3	4	2	3	2	4	2	4	2	2	2	2	2	2
0	3	5	4	3	3	4	4	3	4	4	5															4	4	4	4	3	4	2	3	4	2	5	5	1	5	3	4	3	4	3	3	2	3	3	2
0	5	4	4	4	4	4	4	5	5	4	5	4	4	4	4	4	4	2	4	4	5	4	5	2	5															3	3	3	3	3	3	4	3	3	3
0	5	5	3	4	3	3	5	4	5	3	5	4	4	3	3	3	4	3	3	4	3	4	5	1	5	4	4	3	3	3	4	4	3	4	4	4	4	2	4
0	2	2	2	4	4	2	4	3	2	4	3	2	2	1	2	4	2	4	4	2	4	2	2	4	2	3	2	2	4	4	3	5	4	4	5	4	4	2	4
0	4	4	4	4	4	4	4	4	4	4	4	3	3	3	3	4	4	3	4	4	2	4	4	2	4															3	4	3	4	4	3	2	4	3	3
0	4	3	3	2	4	4	3	3	4	2	4															3	4	3	3	3	3	3	4	3	4	4	4	2	4	3	4	3	5	3	3	3	4	4	3
0	4	5	3	4	4	4	5	4	4	4	4	3	4	2	4	4	3	4	4	4	2	4	4	2	4	3	5	5	5	4	4	3	4	5	2	5	5	2	4
0	4	4	4	4	2	4	2	3	4	2	5	3	4	4	4	2	4	1	2	4	1	5	5	1	5															3	4	3	4	3	4	2	3	4	2
0	2	5	4	5	4	5	4	4	4	2	4	1	3	2	3	4	2	4	4	1	4	2	2	4	2															2	4	2	3	4	3	2	2	2	3
0	5	5	5	5	5	5	5	5	5	5	5	5	5	5	5	5	5	5	5	5	5	5	5	1	5	5	5	5	5	5	5	5	5	5	5	5	5	1	5
0	4	5	4	5	5	5	5	4	5	5	5	4	4	4	4	4	4	4	4	4	2	4	4	2	4	5	5	5	5	5	5	2	5	5	2	5	5	1	5
0	3	4	3	4	3	3	4	2	3	3	3															4	3	4	4	3	3	2	3	4	2	4	4	2	4	2	4	4	4	3	4	4	3	4	3
0	1	2	1	5	5	1	4	5	1	4	2	1	1	1	1	1	1	1	1	1	1	5	1	5	1	5	1	5	1	1	5	3	5	5	1	5	5	1	5
0	4	4	4	4	4	4	4	4	5	4	4															4	4	4	4	4	5	2	5	5	3	5	5	2	5	4	4	4	4	4	4	4	4	4	2
0	4	4	4	4	4	4	4	4	4	4	4	4	4	4	4	4	4	4	4	4	4	4	4	4	4	4	4	4	4	4	4	4	4	4	4	4	4	4	4
0	5	5	4	4	4	5	4	4	5	4	5	4	5	3	3	4	5	2	4	5	2	5	5	1	5															3	4	3	4	3	3	4	3	3	3
0	3	3	3	3	3	3	3	3	3	3	3															3	3	3	3	3	3	3	3	3	3	3	3	3	3	3	3	3	3	3	3	3	3	3	3
0	3	2	3	3	3	3	3	2	3	2	3	2	3	3	3	3	3	3	3	3	3	3	2	3	3															3	3	3	3	3	3	3	1	3	3
0	3	4	2	4	3	4	4	3	3	5	4	2	3	2	2	3	3	4	2	3	4	3	4	2	3	2	5	4	5	4	5	4	4	5	4	5	5	1	5
0	3	4	4	3	3	4	4	2	4	4	5															4	4	5	3	2	5	3	4	5	2	5	5	1	5	4	3	3	4	4	4	2	5	4	2
0	5	5	5	3	4	5	4	4	4	5	5	4	4	4	4	5	3	4	4	5	3	4	4	4	4	5	5	5	5	5	5	5	5	5	5	5	5	2	5
0	4	4	4	4	5	4	5	5	5	5	5	4	3	2	3	3	3	4	3	2	4	3	4	1	3															4	4	3	4	4	4	2	4	3	2
0	3	4	3	4	3	3	4	3	3	3	4	2	3	2	3	3	3	3	3	2	3	3	3	3	3															3	3	2	3	3	3	4	3	3	3
0	4	3	5	5	4	4	3	3	3	4	4	5	4	3	4	4	5	5	4	5	3	3	4	3	5															4	4	4	5	4	3	4	4	3	3
0	4	4	4	3	4	4	3	3	4	3	4															4	3	4	3	4	4	2	4	4	4	4	4	2	4	4	4	3	3	4	4	3	4	4	2
0	4	4	4	3	4	4	4	4	4	4	4															4	4	4	4	4	4	3	4	4	2	4	4	2	4	4	4	4	4	4	4	2	4	4	2
0	4	4	3	4	4	4	5	3	5	5	4	5	3	5	1	3	5	1	2	5	1	5	5	1	5	3	3	5	4	2	5	3	1	5	1	4	5	1	4
0	4	5	3	4	4	4	5	4	4	5	5															3	4	3	4	4	4	5	5	3	5	4	4	2	4	3	5	3	5	3	4	2	2	3	2
0	3	4	3	3	3	4	3	3	4	4	3	4	2	4	2	3	4	3	3	4	3	4	4	2	4	4	4	3	3	3	3	3	3	3	3	3	3	3	3
0	4	4	4	3	5	4	5	5	5	4	5	2	5	4	4	5	4	2	5	4	2	5	5	1	5	3	4	5	4	5	5	4	5	4	4	5	5	1	5
0	5	5	5	5	4	4	1	4	5	1	5	5	5	5	5	5	5	4	4	5	1	5	5	1	5															5	5	4	5	5	5	5	5	5	2
0	4	5	5	4	4	4	5	4	5	5	4	4	4	4	4	4	4	5	4	4	5	4	4	1	4	5	5	5	5	5	5	5	5	5	5	5	5	1	5
0	5	5	5	5	5	5	5	5	5	5	5	3	4	3	4	4	3	4	4	3	3	3	4	2	4															4	5	4	5	5	4	1	5	3	1
0	4	4	4	5	4	4	3	4	4	4	4															4	4	4	4	4	4	4	4	4	4	5	5	1	5	4	4	3	4	4	4	2	4	4	2
0	4	4	4	4	3	4	4	4	5	4	5	5	3	5	5	3	5	2	4	5	3	5	5	1	5	4	2	5	4	3	5	1	4	5	1	5	5	1	5
0	5	5	5	5	3	5	4	5	5	4	5	3	4	5	4	5	5	4	5	5	4	4	4	5	4	5	4	5	5	5	5	5	2	5	1	2	5	1	5
0	4	5	4	4	5	5	5	5	4	5	5	5	2	4	2	5	5	1	5	4	1	5	5	1	5															4	4	3	5	5	3	1	5	3	1
0	3	4	3	4	3	4	4	3	4	4	4															4	4	4	4	3	4	3	3	4	2	5	5	1	5	3	2	2	2	4	3	2	4	3	2
0	3	5	3	4	3	4	4	4	4	4	4	4	3	3	3	3	4	3	3	4	2	4	4	2	4															4	3	3	3	3	3	4	3	3	3
0	4	4	4	4	5	5	5	4	5	4	5	5	5	5	5	4	5	4	5	5	4	4	5	5	4	5	4	4	4	5	4	5	5	5	5	4	5	5	5
0	5	5	5	4	4	5	2	4	5	2	5	5	1	5	1	5	5	1	4	5	1	5	5	1	5	5	5	5	5	4	5	1	4	5	1	5	5	1	5
0	4	4	4	2	4	5	3	4	4	3	5	4	3	4	3	4	4	2	4	4	2	5	5	1	5															4	4	4	4	4	4	1	4	4	1
0	4	5	4	3	4	5	5	4	5	4	5															5	5	5	5	4	5	2	4	5	2	5	5	1	5	5	4	5	5	4	5	5	5	5	1
0	3	5	3	5	4	4	5	4	4	4	4	3	4	3	5	3	4	2	4	4	2	4	4	2	4	4	4	5	4	4	4	2	4	4	2	5	5	2	5
0	3	4	4	3	4	4	4	3	5	4	4	5	4	4	4	4	5	4	4	4	3	4	3	4	4															4	3	4	4	4	4	4	4	4	4
0	4	5	4	5	2	5	4	4	5	4	5	5	5	5	5	4	5	2	4	5	2	5	5	1	5															2	5	4	5	4	4	2	4	4	2
0	4	4	4	4	4	5	4	3	5	4	5	3	3	3	3	3	4	2	4	3	2	4	4	1	4															4	4	3	4	3	3	3	3	3	2
0	4	4	5	4	5	3	5	4	5	5	5	5	5	5	5	4	5	4	4	5	5	4	5	4	5															5	4	4	4	5	4	5	5	5	5
0	4	4	4	3	3	5	5	4	5	5	5															4	4	4	4	4	4	4	4	4	4	4	4	1	4	4	4	4	5	4	4	3	5	4	4
0	3	2	3	4	3	4	2	4	3	2	4															2	3	2	3	3	4	2	4	3	4	4	4	2	4	3	4	3	4	3	4	2	3	3	2
0	5	2	1	4	4	3	4	3	5	2	4	3	4	3	3	3	1	4	2	5	2	4	2	3	5	4	4	4	5	2	3	3	2	1	5	3	2	3	5
0	3	4	4	3	4	5	3	3	5	3	5	4	4	4	4	4	5	2	3	5	2	4	5	1	4	4	4	3	5	3	4	2	3	4	1	5	5	1	5
0	3	5	5	3	2	5	4	4	5	2	5	2	3	4	4	2	5	2	3	4	2	4	5	1	5															2	4	2	4	2	2	2	2	3	2
0	5	5	4	5	5	5	4	5	5	3	5	3	4	3	4	3	3	3	3	3	3	3	4	1	3															4	5	4	5	4	4	1	5	4	1
0	4	3	3	3	3	4	4	3	4	4	4	3	3	3	2	2	3	2	2	3	2	4	4	2	4	3	3	3	2	3	3	4	3	3	4	3	4	2	4
0	5	5	4	5	4	5	4	4	4	4	5	4	3	3	3	3	3	4	3	3	4	3	4	2	4															4	5	3	5	3	4	3	3	3	2
0	5	5	5	4	5	5	4	5	5	4	5															5	5	5	5	5	5	5	5	5	5	5	5	1	5	5	5	5	5	5	5	1	5	5	1
0	3	2	3	3	3	3	4	4	3	4	3															3	3	4	3	4	4	2	4	4	2	4	4	2	4	3	4	3	4	4	3	3	4	3	3
0	4	4	5	5	5	5	5	5	5	5	5	5	5	5	5	4	5	4	4	5	3	5	5	2	5															4	4	5	5	4	5	2	4	5	2
0	4	4	4	4	3	4	4	3	4	4	5	4	3	3	3	2	4	2	4	4	2	4	4	2	4	4	4	4	2	2	4	2	2	4	2	4	4	2	4
0	4	5	3	5	4	4	3	4	4	3	5	3	4	3	4	3	4	1	3	3	1	3	4	2	3	4	5	5	5	3	5	1	3	5	1	5	5	1	5
0	2	4	4	2	3	4	5	3	5	5	5	3	3	4	3	3	4	4	3	5	4	4	5	1	4	3	4	4	5	3	4	4	3	5	4	4	4	1	4
0	4	4	3	4	4	4	4	4	4	4	4	2	2	2	2	2	2	2	2	2	3	2	2	4	2	4	4	4	4	4	4	2	4	4	2	4	4	2	4
0	5	5	5	4	5	5	4	4	5	2	5	5	4	5	2	5	4	4	4	5	5	3	4	3	4	5	4	5	4	5	3	4	4	5	5	4	5	4	4
0	4	4	5	2	1	3	2	1	1	3	3	3	4	4	4	3	5	4	3	3	3	4	3	4	3	4	5	5	2	3	3	3	3	5	1	4	3	4	3
0	3	4	4	2	4	4	2	4	4	4	4	3	3	3	3	3	3	2	3	3	2	4	3	2	3															3	4	2	4	3	3	2	4	3	2
0	4	5	5	4	1	2	3	2	3	4	3	3	1	4	4	2	5	3	2	2	1	4	2	3	1															4	3	4	1	1	2	5	3	2	2
0	3	5	3	4	4	3	4	4	4	2	4	2	3	3	3	4	4	3	4	3	3	4	4	1	4															3	4	4	3	4	3	2	3	3	2
0	1	1	5	2	5	3	3	1	4	3	4															5	1	3	1	4	4	3	1	3	3	4	1	3	1	4	5	1	1	1	3	1	3	4	4
0	5	5	5	4	5	5	5	5	5	2	5															5	5	5	4	5	5	2	5	5	2	5	5	2	5	5	4	4	4	5	5	2	5	5	2
0	4	4	2	4	3	4	4	4	4	4	4	3	5	3	5	4	4	2	4	4	2	5	4	2	4															5	5	2	5	3	5	3	3	4	2
0	5	5	5	4	4	5	2	5	5	2	5	4	4	5	4	4	5	2	4	4	2	4	4	1	4															4	4	4	3	4	4	2	4	4	2
0	1	1	1	1	1	4	1	3	1	5	1	1	1	4	1	1	2	1	1	1	4	1	1	1	4															1	1	1	2	1	4	1	4	1	1
0	2	4	2	3	2	4	4	3	3	5	4															4	2	5	1	4	5	2	4	4	1	5	5	1	5	3	3	3	4	3	2	3	4	2	2
0	5	5	5	5	5	5	5	5	5	5	5															5	5	5	5	5	5	1	5	5	1	5	5	1	5	5	5	5	5	5	5	1	5	5	1
0	4	4	4	4	3	4	4	4	4	4	4	4	4	3	4	4	3	4	4	4	3	4	4	2	4															3	4	3	4	3	3	3	3	3	3
0	2	1	5	2	4	1	3	2	4	3	3	3	5	1	2	4	2	1	2	4	3	3	1	2	2															3	1	2	3	2	2	1	1	2	2
0	1	4	1	1	1	5	3	1	4	1	1	3	1	1	3	1	4	1	1	1	3	2	2	4	3	5	1	1	1	1	3	3	4	1	4	3	3	4	2
0	4	5	4	4	3	4	4	4	5	3	5															4	4	5	4	3	4	4	4	5	2	4	4	4	4	4	3	4	3	4	5	2	4	5	2
0	1	4	1	1	1	1	1	1	1	5	5	1	5	1	1	1	1	4	1	1	1	3	4	3	3	1	1	4	1	1	3	1	1	1	4	4	4	4	5
0	3	4	2	5	3	5	4	5	3	2	3															5	3	3	3	5	5	1	4	4	4	4	5	3	2	3	2	4	3	5	1	3	5	4	2
0	1	1	1	1	5	1	1	4	1	1	1															1	1	1	1	1	1	1	1	1	1	4	4	2	4	1	1	1	1	1	1	1	1	1	1
0	3	3	3	3	3	4	4	3	4	4	3															3	3	3	4	4	4	2	4	3	2	4	4	1	4	3	2	3	3	3	3	3	3	3	2
0	5	5	5	5	5	5	5	5	5	5	5															5	5	5	5	1	5	1	5	5	1	5	5	1	5	5	5	5	5	5	5	5	4	5	5
0	5	5	5	5	5	5	4	5	5	4	5															5	3	5	5	4	5	5	5	5	4	4	5	2	5	5	5	5	5	5	5	5	5	5	2
0	4	1	4	3	5	4	1	1	1	1	1															4	1	5	3	1	1	4	4	1	4	3	4	1	4	3	1	4	1	1	3	3	4	4	5
0	4	5	4	5	4	3	5	3	5	4	5	4	4	5	4	4	5	4	3	5	4	5	4	5	4	4	5	4	5	5	4	5	3	5	4	3	4	4	3
0	5	4	2	4	3	5	4	3	1	2	2															2	1	4	3	4	4	5	5	3	2	2	5	3	4	5	2	5	3	1	4	4	4	2	3
0	5	5	5	5	4	5	5	5	5	5	5	4	5	4	5	4	4	4	5	5	5	4	4	4	4	4	4	3	4	3	3	4	4	5	3	4	4	3	4
0	4	4	4	4	4	4	4	4	4	4	5															5	2	5	3	4	5	4	4	5	4	5	5	1	5	4	3	3	3	4	4	4	3	3	4
0	5	5	5	3	4	5	5	4	5	4	5	5	3	4	3	3	5	2	3	4	1	4	4	1	4															4	3	4	1	3	4	1	3	4	3
0	4	4	3	4	3	4	4	3	4	4	4	3	4	3	4	3	4	2	2	4	2	4	4	1	4	3	4	3	4	3	3	5	4	4	5	4	4	2	4
0	4	5	3	3	5	4	4	4	4	4	4															4	2	3	3	4	3	4	4	4	4	5	5	1	5	4	4	4	4	4	4	4	4	4	2
0	3	4	3	4	3	4	4	4	3	4	4															3	4	2	3	3	2	4	3	3	3	4	4	2	4	3	4	3	4	3	3	3	3	3	2
0	4	5	5	5	4	5	5	4	5	5	5	5	3	3	4	4	4	4	4	5	1	3	4	2	4															3	5	4	5	4	4	2	4	4	2
0	2	2	3	4	3	4	3	3	4	3	4	2	2	2	2	2	2	2	3	2	2	2	2	4	2	3	3	4	2	3	3	2	3	4	2	4	4	2	4
0	4	4	3	2	4	3	4	4	4	4	5															4	4	4	2	4	4	2	4	4	2	5	4	2	4	4	4	4	4	4	4	2	4	4	2
0	4	5	4	4	4	4	2	4	4	4	5															4	5	4	5	4	4	1	4	5	1	5	5	1	5	4	5	4	5	4	4	1	4	4	1
0	4	4	4	4	4	4	4	4	4	4	4	4	4	4	4	4	4	4	4	4	4	4	4	1	4	4	4	4	3	4	4	2	4	4	2	5	5	1	5
0	4	5	4	4	4	4	4	4	4	4	5	4	4	4	4	4	4	3	4	4	2	5	5	1	5	4	4	4	4	4	4	2	4	4	2	5	5	1	5
0	5	5	5	3	5	5	2	5	5	2	5	5	2	5	3	5	5	1	5	4	1	4	5	1	4															4	4	4	3	4	4	3	4	4	3
0	4	4	4	4	4	4	2	4	4	2	4	4	4	4	3	4	4	2	4	4	2	4	4	2	4															4	4	4	4	4	4	2	4	4	2
0	3	4	3	3	4	4	3	3	4	2	4	4	4	4	3	4	4	3	4	4	2	5	4	2	4	3	3	3	3	4	4	2	4	3	2	4	4	2	4
0	5	5	5	5	5	5	5	5	5	5	5	5	5	5	5	5	5	5	5	5	5	5	5	1	5	5	5	5	1	5	5	5	5	5	5	5	5	5	5
0	4	4	3	4	2	4	3	2	4	4	5	4	2	4	2	3	4	2	2	3	2	5	4	1	5	4	2	4	1	3	4	1	3	4	1	5	4	1	5
0	4	5	4	4	4	5	4	4	4	2	4	3	3	3	3	2	3	4	4	3	4	3	3	3	3	3	3	4	3	3	4	4	3	4	4	4	3	2	3
0	4	4	4	4	4	4	4	4	4	4	4	4	4	4	4	4	4	4	4	4	4	4	4	4	4															4	4	4	4	4	4	4	4	4	4
0	4	4	4	3	3	4	3	3	4	4	3															4	3	4	3	3	4	3	4	4	3	4	4	2	4	4	3	3	3	4	3	3	3	3	3
0	2	4	2	5	2	3	5	3	2	5	2	2	4	2	3	2	3	4	3	2	4	3	4	1	3	5	5	5	4	5	5	2	4	5	1	5	5	1	5
0	4	4	4	3	4	4	5	4	4	4	5															4	3	3	3	3	4	3	4	3	2	5	4	1	4	5	5	4	4	4	4	2	4	4	2
0	4	4	4	3	3	5	4	4	4	4	5	4	4	3	4	4	4	4	4	4	4	4	4	1	4															4	4	3	4	4	4	2	4	4	2
0	4	4	4	3	3	5	4	4	5	4	5	4	4	4	4	4	4	2	4	4	2	5	5	1	5															4	4	4	4	4	4	3	4	4	2
0	5	5	5	3	5	5	2	5	5	2	5	4	4	3	4	4	4	2	4	3	3	4	4	1	5	4	4	4	4	4	5	2	4	4	2	5	5	1	5
0	4	4	4	3	3	4	4	4	3	4	4	3	3	3	3	4	3	3	4	3	3	3	4	2	3	3	4	3	4	3	4	4	3	2	3	3	3	2	2
0	5	5	5	5	5	5	5	5	5	5	5	3	4	4	4	4	4	4	4	4	4	5	5	5	5															4	4	4	4	4	4	4	4	4	3
0	3	4	3	3	3	4	4	3	4	4	4	3	3	2	3	3	3	3	3	3	3	4	3	2	4	3	3	3	3	3	4	4	4	4	4	4	4	2	4
0	3	3	3	3	3	3	3	3	3	3	3	3	3	3	3	3	3	3	3	3	3	4	4	1	4	3	3	3	3	3	3	3	3	3	3	3	3	3	3
0	3	4	3	2	4	3	4	4	3	4	4															4	4	4	2	4	4	3	4	4	2	5	5	1	5	4	4	4	5	4	4	2	4	5	2
0	3	2	3	4	3	3	4	3	3	3	4	3	2	3	2	3	3	2	3	4	2	3	3	3	3	4	3	4	4	3	4	2	4	4	2	4	4	2	4
0	4	4	4	4	4	4	4	3	4	2	5	4	4	4	3	4	4	2	4	4	1	4	5	1	4															3	4	3	3	3	3	2	3	3	1
0	1	5	1	5	1	4	5	1	1	5	5	1	4	1	4	1	1	5	1	1	2	1	5	1	1															1	5	1	4	1	1	2	1	1	5
0	4	3	3	3	2	3	5	2	4	5	4	1	3	1	1	3	1	2	4	1	2	1	1	5	1	4	4	5	4	3	4	1	3	4	1	5	5	1	5
0	4	4	3	4	3	4	2	3	4	2	4	3	2	2	3	3	2	2	3	3	3	3	4	3	3															3	4	3	3	3	2	2	4	3	2
0	4	4	3	5	4	4	4	4	4	4	4	3	4	2	4	4	2	4	4	3	4	3	3	3	3															4	4	3	4	4	4	2	5	4	2
0	4	4	4	3	4	4	4	4	4	3	4															4	4	4	3	4	4	2	4	4	2	4	4	2	4	4	3	3	2	4	3	2	4	3	3
0	4	2	2	4	2	2	4	2	2	4	3															4	2	2	2	2	4	3	2	3	3	4	4	2	4	3	2	2	2	2	2	2	2	2	2
0	5	5	4	5	5	5	5	5	5	4	5	5	5	5	5	5	5	2	5	5	2	5	5	1	5															5	5	5	5	5	5	1	5	5	1
0	5	5	3	3	3	5	5	3	3	5	5	3	3	1	3	5	2	1	3	3	1	5	5	1	5															3	3	3	3	3	3	3	3	3	3
0	4	4	3	5	4	4	4	4	4	4	3															4	5	4	4	4	4	2	4	5	2	4	4	1	4	4	4	4	4	4	4	2	4	4	2
0	5	5	4	5	5	5	5	4	5	5	5	4	4	4	4	4	4	4	4	4	5	4	4	1	4	4	5	4	5	4	5	4	4	5	2	5	5	1	5
0	4	4	4	5	3	4	1	4	5	4	5	5	1	5	1	4	5	2	5	5	2	5	5	5	5															3	3	3	3	3	3	3	3	3	3
0	3	5	4	4	4	4	4	4	4	2	4															4	4	4	3	4	4	2	4	4	1	4	4	1	4	3	4	3	4	4	4	1	4	3	1
0	5	5	5	5	4	5	2	4	5	1	5	3	4	4	4	4	3	2	4	4	2	4	5	1	5	4	5	5	5	5	5	2	5	5	2	4	4	4	4
0	4	4	3	2	3	4	4	5	4	4	4															5	5	5	3	5	5	2	5	5	2	5	5	1	5	4	3	4	4	5	5	2	4	5	2
0	4	4	4	3	3	4	5	4	4	4	5															4	5	4	4	4	4	2	4	4	2	5	4	1	4	4	4	4	4	4	4	2	4	4	2
0	4	3	4	4	4	4	4	4	4	3	4															4	4	4	3	4	5	2	4	5	2	4	4	1	4	4	4	4	4	3	4	2	3	4	2
0	4	3	3	4	4	4	4	4	4	4	4															4	4	4	4	4	4	2	4	4	2	4	4	2	4	3	4	3	4	4	3	2	4	3	2
0	1	3	1	3	4	3	1	5	1	1	5															3	3	4	5	1	1	4	1	3	1	1	1	5	4	3	3	4	1	1	5	1	1	4	1
0	3	4	2	4	3	4	4	3	4	4	4															5	4	3	5	4	4	2	3	4	1	5	5	1	5	4	4	2	3	4	4	1	3	3	1
0	5	5	5	4	5	5	4	5	5	4	5	3	4	4	4	4	5	1	5	5	1	4	4	1	5															4	4	5	4	4	5	1	5	5	1
0	4	5	5	4	4	5	5	5	5	5	5	4	5	4	5	5	5	1	5	5	1	5	5	1	5															4	5	3	5	5	3	4	5	3	4
0	5	2	3	4	1	4	5	3	2	3	5	1	4	3	2	3	3	5	5	1	2	5	1	4	5															2	4	5	2	2	1	3	2	3	3
0	4	4	5	4	4	4	4	4	4	2	4	4	4	4	4	4	4	4	4	4	2	4	4	2	4															4	4	4	4	4	4	2	4	3	2
0	2	3	2	5	2	3	4	4	3	4	2	2	3	1	2	3	3	3	2	2	3	2	2	4	2	3	2	4	3	3	3	3	3	3	4	4	3	2	3
0	4	5	4	5	3	5	5	4	5	4	5	2	2	2	2	4	4	4	4	2	5	2	3	2	2															4	3	4	3	4	4	4	4	3	4
0	4	5	4	3	3	5	4	3	5	4	5	5	3	5	3	5	5	2	3	4	3	5	5	2	4	4	3	4	3	4	4	2	4	4	2	4	4	2	5
0	5	5	4	4	4	5	3	5	5	3	5	4	4	4	4	4	4	4	4	4	3	5	5	2	5															4	3	3	3	4	3	3	3	3	3
0	3	5	3	5	3	5	5	5	3	5	5	5	5	5	5	5	5	5	5	5	2	5	5	2	5															5	2	2	2	5	5	5	5	5	2
0	4	5	4	5	5	4	5	4	4	4	4	5	5	5	5	5	5	5	5	5	5	4	4	4	4															1	1	1	1	5	1	5	1	1	5
0	4	5	3	4	4	4	4	3	4	3	3															3	4	4	2	4	4	4	3	5	3	5	4	2	4	5	4	3	4	4	4	2	4	4	2
0	4	1	2	1	4	4	3	3	5	1	4	1	1	1	4	3	5	3	5	2	1	1	3	4	4	5	1	2	1	4	1	4	1	4	3	4	1	5	3
0	5	3	3	2	3	2	4	4	2	2	3	2	1	3	4	2	3	2	3	3	5	3	3	5	4															3	3	5	2	2	5	3	3	4	3
0	3	3	3	4	3	4	5	4	4	2	4	4	3	4	3	3	3	2	2	1	2	4	4	2	5															4	4	5	3	3	5	5	4	4	4
0	4	4	3	4	2	4	4	2	4	2	3	4	2	4	2	4	4	2	4	4	1	5	5	1	4	4	4	4	4	5	5	1	5	5	1	5	5	1	5
0	5	3	4	3	2	2	2	1	3	2	3	3	2	5	3	4	3	3	4	5	2	4	4	3	5	2	2	3	4	4	1	4	5	3	3	5	5	4	1
0	5	5	4	2	5	3	4	4	4	4	4															5	5	5	4	4	4	4	4	5	4	4	4	5	5	3	4	4	2	5	5	4	5	4	4
0	4	4	3	4	4	4	4	4	4	4	4	4	4	4	4	4	4	3	4	4	2	4	4	2	4															3	3	3	3	3	3	3	3	3	3
0	4	4	4	2	2	4	2	2	4	2	4	3	2	2	2	2	4	2	2	3	2	4	4	2	3															4	4	3	4	4	4	2	4	4	2
0	5	5	5	2	4	4	4	4	5	5	5	4	4	4	3	4	5	2	4	4	2	4	4	2	4	3	4	4	3	4	4	2	4	4	2	4	3	2	4
0	5	5	5	5	5	5	5	5	5	5	5	3	4	3	4	4	3	4	5	4	4	5	5	1	5	5	5	5	5	5	5	1	5	5	1	5	5	1	5
0	4	2	3	5	4	4	3	5	4	3	3															4	3	3	3	5	4	2	3	4	4	4	4	5	5	5	4	4	5	4	3	2	4	3	3
0	4	4	4	3	4	4	3	4	4	3	4															4	4	4	3	4	4	2	4	4	2	4	4	2	4	4	3	3	2	4	4	2	4	3	2
0	4	4	4	4	4	4	2	4	4	2	4	4	3	4	3	4	4	2	4	4	2	4	4	2	4															4	3	4	2	4	4	2	4	3	2
0	3	3	3	3	3	3	3	3	3	3	3	3	3	3	3	3	3	3	3	3	3	3	3	3	3	3	3	3	3	3	3	3	3	3	4	3	2	3	3
0	5	4	5	4	5	5	3	4	5	4	5															4	4	5	5	5	5	2	4	5	1	5	5	1	5	5	4	5	4	4	5	3	4	5	2
0	4	4	4	4	4	4	4	4	4	4	5	4	4	4	4	3	4	2	4	4	4	4	2	3	3	4	4	5	4	5	3	3	3	3	5	4	4	5	3
0	4	5	3	3	3	3	4	4	4	4	5															4	3	4	3	4	4	3	3	5	4	4	5	2	5	4	3	3	3	2	3	4	4	2	3
0	3	3	2	2	2	4	3	4	4	4	4	4	4	2	3	3	4	2	3	3	2	5	5	1	5	3	5	4	5	4	5	1	5	4	1	5	5	1	5
0	4	4	4	3	4	5	4	4	4	2	5	4	4	4	4	4	4	4	4	4	2	4	5	1	4	4	5	4	4	2	4	2	4	4	2	5	5	1	4
0	4	4	4	3	4	4	4	4	5	4	4	4	3	4	4	4	4	2	4	4	4	4	4	2	4	3	3	2	3	4	2	3	4	3	4	2	3	2	3
0	5	5	5	5	5	5	5	5	5	5	5	5	5	5	5	5	5	1	5	5	1	5	5	1	5	5	3	5	5	5	5	1	5	5	1	5	5	1	5
0	5	4	5	4	5	5	4	4	5	5	4	4	4	4	5	4	5	1	5	5	2	4	4	1	5															4	4	4	4	4	4	2	4	4	2
0	4	4	3	3	3	4	3	4	4	2	3	4	4	4	2	4	4	2	4	4	2	4	4	2	4	4	5	4	5	5	4	2	4	4	2	4	4	2	4
0	5	5	5	4	3	5	4	4	5	3	5															5	5	4	4	4	4	2	4	4	2	5	5	1	4	4	5	4	5	4	4	1	4	4	2
0	5	4	5	3	4	5	4	4	5	4	5	4	4	4	3	4	4	2	4	4	2	4	4	2	4															4	4	4	2	4	4	2	4	4	2
0	3	3	3	5	2	3	3	3	3	3	3	2	3	2	3	2	2	3	3	2	2	3	3	2	3	3	3	4	3	2	4	2	2	3	2	4	4	1	5
0	4	3	4	5	5	4	5	5	4	5	5	5	4	5	4	5	5	4	5	5	5	5	5	4	5	5	5	4	5	5	5	4	5	5	4	4	5	1	5
0	5	5	5	4	4	5	4	5	5	4	4															5	5	5	5	5	5	1	5	5	1	5	5	1	5	5	5	5	5	5	5	1	5	5	1
0	3	3	3	3	3	3	2	3	4	3	4	4	4	4	4	4	4	4	4	4	4	3	4	4	4	4	4	3	4	4	4	3	3	4	4	3	3	2	3
0	5	4	5	5	4	4	4	4	4	5	5															4	5	5	4	4	4	5	5	5	5	5	4	5	4	5	5	5	4	4	5	5	4	4	4
0	1	1	1	3	1	4	1	4	5	1	4	1	3	1	1	1	4	4	1	3	5	1	5	4	1	1	5	1	1	1	3	4	1	3	4	5	1	4	4
0	2	4	1	3	4	2	1	2	5	3	5	5	1	1	4	3	2	4	2	2	3	1	2	4	3	4	5	5	3	4	1	2	4	3	2	2	4	3	5
0	5	5	5	3	4	5	4	5	5	5	5															5	5	5	4	5	5	1	5	5	1	5	5	1	5	5	3	5	3	5	5	1	5	5	2
0	4	2	3	1	2	2	2	4	5	4	4	5	5	3	2	5	3	3	5	1	3	4	5	4	1	3	3	5	5	2	1	3	4	5	3	3	3	1	5
0	5	5	5	4	5	5	4	5	5	4	5	5	4	5	4	5	5	2	5	5	2	5	5	1	5	5	5	5	5	5	5	1	5	5	1	5	5	1	5
0	4	5	4	4	4	4	4	4	4	5	4	4	3	3	3	4	3	4	4	3	3	3	4	2	4															4	3	3	4	3	3	3	3	3	3
0	5	1	5	1	1	4	1	3	4	3	1	1	3	3	1	4	4	5	4	1	1	3	4	1	3	1	3	1	1	1	1	1	3	4	4	1	1	4	3
0	3	4	3	4	3	4	4	3	4	4	4															4	4	3	3	3	4	3	3	4	3	4	4	2	4	3	4	3	4	3	4	3	3	4	3
0	4	4	4	3	3	5	4	4	5	4	4	4	4	4	4	3	4	2	3	4	2	4	4	2	4	4	4	5	3	4	5	2	4	5	1	5	5	2	5
0	1	1	5	1	4	4	1	5	3	1	4	3	5	1	4	1	3	1	1	1	1	5	1	4	1															4	1	5	1	1	4	1	1	1	4
0	4	5	4	5	5	5	4	5	5	4	3															4	5	5	5	4	5	4	5	4	4	5	4	4	5	4	5	4	5	5	5	4	5	5	4
0	3	3	3	3	3	3	3	3	3	3	3															3	3	3	3	3	3	3	3	3	3	4	5	1	4	3	3	3	3	3	3	3	3	3	3
0	2	4	2	3	2	1	1	3	3	3	2	3	2	2	2	1	3	1	3	3	2	3	1	2	1															4	3	1	4	3	2	5	3	2	2
0	3	5	3	3	3	5	4	4	5	5	5	2	5	3	4	4	3	2	4	3	2	4	4	2	4															3	4	3	4	4	4	2	4	4	2
0	1	3	4	1	4	4	1	1	1	3	4	4	5	4	1	1	3	1	3	4	3	4	4	3	2															1	1	1	5	3	1	3	3	4	5
0	2	1	1	2	2	3	3	3	1	4	4															3	2	3	2	2	5	1	3	4	2	4	4	1	4	2	2	2	4	2	4	1	3	2	1
0	5	5	5	5	5	5	5	5	5	5	5	5	5	5	5	5	5	5	5	5	5	5	5	5	5	5	5	5	5	5	5	5	5	5	5	5	5	5	5
0	5	4	4	5	5	5	5	5	5	5	4	4	5	5	5	4	5	4	5	5	5	5	5	5	5	4	5	5	5	5	5	5	5	5	5	5	4	5	5
0	4	5	4	5	4	5	4	5	3	5	4															5	5	3	5	4	4	4	5	5	4	4	5	4	5	4	4	4	5	5	4	4	5	5	5
0	5	5	5	5	5	5	5	5	5	5	5	5	5	5	5	5	5	1	5	5	1	5	5	1	5															5	5	5	5	5	5	1	5	5	1
0	4	3	1	3	2	2	2	3	5	5	5	3	2	1	3	3	5	3	4	4	2	4	3	2	5	2	3	3	4	5	1	4	2	3	3	5	2	3	1
0	3	2	3	2	3	2	3	3	3	3	5															4	3	4	4	3	5	4	5	5	3	3	3	2	3	3	4	3	4	3	3	3	3	3	3
0	5	5	4	5	5	4	5	5	4	5	4															5	4	5	5	4	5	5	5	5	5	5	5	5	5	5	5	4	5	4	4	4	4	4	4
0	3	4	3	4	3	4	4	3	4	3	4	4	4	4	4	3	3	3	3	3	3	3	4	3	4															4	3	3	2	3	4	4	4	3	3
0	4	3	4	3	3	4	3	2	4	4	4	4	4	4	3	4	4	3	4	4	2	4	4	2	4															3	4	3	4	3	3	4	4	3	4
0	4	5	5	5	5	4	4	5	5	4	4	4	4	5	5	5	5	5	5	4	5	5	5	5	5	4	5	4	5	4	5	5	5	5	4	4	5	4	5
0	4	5	4	4	4	5	3	4	4	3	5	4	3	3	3	4	4	2	4	4	4	3	5	2	3															4	2	4	3	4	4	2	4	3	2
0	4	4	4	4	4	4	4	4	4	3	5	5	4	4	4	4	5	4	4	5	4	5	5	1	5															5	2	4	2	5	4	2	3	4	3
0	4	4	3	2	3	4	2	2	4	2	3															3	4	4	4	4	4	3	4	4	2	4	4	2	4	4	4	3	3	3	4	3	3	4	3
0	4	4	4	4	4	5	4	4	5	3	5	4	3	3	3	4	4	4	5	3	3	3	4	2	4															5	4	4	3	4	4	4	4	4	4
0	5	5	5	1	4	5	5	5	5	5	5	5	4	4	3	5	4	1	5	4	1	5	5	1	5	5	4	4	5	4	5	1	4	5	2	5	5	1	5
0	4	4	3	4	3	4	2	3	4	2	4	4	2	3	2	3	4	2	4	4	2	4	4	2	4															4	4	3	4	3	4	2	4	4	2
0	2	3	4	4	3	5	2	1	5	4	4	4	2	4	1	4	3	2	5	5	3	3	4	2	1															5	5	5	5	5	5	5	5	5	5
0	4	4	4	4	4	4	5	4	4	4	4	4	3	3	4	3	4	4	4	2	4	4	4	4	4															4	5	4	4	3	3	3	3	3	3
0	5	5	5	4	5	5	4	4	5	4	5	4	4	4	4	4	5	2	4	5	2	4	4	1	4	4	5	5	5	4	5	2	4	5	2	5	5	1	5
0	2	4	3	3	3	4	4	4	4	4	4															4	2	1	2	5	2	2	4	5	2	5	5	1	4	3	2	3	2	4	4	4	4	4	4
0	3	5	3	4	3	4	2	3	4	2	5															3	4	3	3	3	4	2	3	4	2	4	4	2	4	4	3	3	3	3	3	3	3	3	3
0	5	5	5	5	5	5	5	5	5	5	5															5	5	5	5	5	5	5	5	5	5	5	5	1	5	5	5	5	5	5	1	5	5	5	1
0	4	5	4	2	4	4	2	5	4	5	5															4	4	4	4	4	4	2	4	5	2	4	4	2	5	4	5	4	4	4	4	1	4	4	1
0	3	4	3	2	4	4	4	4	4	4	3	4	4	3	3	4	4	2	4	2	2	4	4	2	4	4	4	3	4	4	4	2	4	4	2	4	4	2	4
0	5	5	5	4	4	5	4	5	5	4	5	3	3	3	3	3	3	3	3	3	4	3	3	3	3	3	4	4	3	4	4	2	4	4	2	4	4	1	4
0	5	5	5	4	5	5	1	5	5	1	5	5	5	5	5	5	5	5	5	5	1	5	5	1	5															5	5	5	4	5	5	1	3	5	1
0	3	2	4	5	3	4	3	2	4	3	4	4	4	4	4	4	4	2	4	4	2	4	4	1	4	4	4	4	4	4	4	2	4	4	2	4	4	2	4
0	5	5	5	2	5	5	5	4	5	5	5	5	3	5	2	5	5	1	5	5	5	5	5	1	5	3	3	4	3	3	4	4	4	4	4	5	5	1	5
0	4	3	3	4	4	4	4	2	4	4	5	4	4	3	4	4	4	4	4	4	4	4	4	2	4															5	4	5	3	5	5	1	4	5	2
0	4	4	4	4	4	4	4	4	4	4	4	5	5	5	5	5	5	5	5	5	2	5	5	2	5															4	4	4	5	4	4	4	4	4	3
0	5	5	5	2	5	5	5	4	5	4	5	4	5	5	5	5	5	3	5	5	2	4	4	2	4	4	5	5	2	4	5	2	4	4	3	5	5	2	5
0	4	4	4	4	4	4	4	4	4	4	4	4	4	3	4	4	4	4	4	4	3	4	4	2	4	4	3	4	4	4	4	2	4	4	2	4	4	2	4
0	3	4	3	3	3	4	3	3	4	3	4															3	4	3	4	4	4	2	4	4	2	4	4	2	4	3	3	3	3	3	3	3	3	3	3
0	5	5	5	4	5	5	5	5	5	5	5															2	4	4	5	4	5	2	4	5	2	5	5	1	5	4	4	4	4	5	5	1	5	5	1
0	5	5	5	5	5	5	5	5	5	5	5	5	5	5	5	5	5	5	5	5	5	5	5	5	5															5	5	5	5	5	5	5	5	5	5
0	4	4	4	3	2	4	4	3	4	4	5	2	3	2	3	2	2	2	2	3	2	4	4	2	4															2	2	2	2	2	4	2	2	3	2
0	5	4	5	4	5	5	2	5	5	2	5	5	5	4	4	5	5	5	5	5	4	5	5	1	5	5	5	5	5	5	4	2	5	4	4	5	5	1	5
0	2	2	2	4	4	2	4	4	3	4	2	2	2	2	3	4	2	2	4	2	2	4	4	2	4	2	4	5	4	4	2	4	4	4	2	4	4	2	4
0	4	5	3	4	4	5	4	4	5	2	5															5	4	3	5	4	5	4	5	4	2	5	5	1	5	5	5	5	4	5	5	1	4	4	1
0	4	2	3	2	3	3	4	3	4	4	3															4	3	4	4	3	4	2	3	4	4	4	4	2	4	4	3	2	3	3	3	4	3	3	4
0	5	5	4	4	4	5	5	4	5	5	5															5	5	4	5	5	5	1	5	5	1	5	5	1	5	5	5	4	5	5	5	1	5	4	1
0	3	4	2	5	4	4	2	5	1	3	1															2	5	3	4	4	1	5	4	2	3	3	4	2	5	2	3	4	5	4	3	4	5	2	1
0	3	4	3	3	2	3	4	3	3	4	4															3	5	3	4	2	5	5	2	3	1	5	5	1	5	3	3	3	3	2	3	2	2	3	2
0	3	4	4	4	4	5	5	4	5	5	4															4	4	4	4	4	4	3	4	4	3	5	5	1	5	3	4	3	4	4	4	3	4	4	3
0	4	5	5	4	4	5	5	4	5	5	5	4	2	4	2	4	4	4	4	4	4	4	4	2	4															4	4	4	5	4	4	2	4	4	2
0	4	5	1	4	2	5	4	3	3	2	3															4	5	4	3	3	2	4	3	3	4	3	2	5	4	4	3	5	5	4	4	2	3	3	4
0	4	4	4	4	3	4	3	4	4	3	5															4	4	4	4	4	4	2	4	4	2	4	4	1	4	4	4	4	4	4	4	3	4	4	2
0	3	3	3	3	4	4	3	3	4	4	4	4	3	3	2	4	4	4	4	4	4	2	3	2	3	4	4	4	4	4	4	3	4	4	3	4	4	2	4
0	5	5	5	5	5	5	5	5	5	5	5															5	5	5	5	5	5	5	5	5	5	5	5	1	5	5	5	3	5	5	5	5	5	5	5
0	5	1	3	2	2	4	4	5	4	3	3	4	2	1	3	3	2	5	5	4	4	5	2	3	4	3	2	3	4	4	4	1	2	5	5	5	2	4	3
0	3	4	4	3	3	3	3	3	3	3	4															4	3	4	3	3	4	3	3	3	3	4	4	2	4	3	3	3	3	3	3	3	3	3	3
0	4	5	4	4	4	4	4	4	4	4	5	4	2	4	2	4	4	2	4	4	2	4	4	1	4															4	4	4	5	4	4	4	5	4	2
0	5	5	5	4	5	5	4	5	5	4	5	4	4	4	4	5	4	1	5	4	1	5	5	1	5															5	5	1	5	5	5	1	5	5	1
0	4	5	3	4	4	4	5	4	5	5	5	5	5	5	5	5	5	1	5	5	1	5	5	1	5															4	5	4	4	4	5	1	5	4	1
0	5	5	5	3	4	5	4	5	5	4	5	4	3	4	3	4	4	2	4	4	2	4	4	2	4	5	4	4	4	5	4	2	5	4	2	5	5	2	5
0	4	5	5	5	4	5	5	3	5	5	5	4	4	2	4	5	4	5	4	4	5	2	4	3	3															4	5	4	5	5	5	4	5	4	4
0	5	5	5	3	3	5	5	4	5	4	5	4	4	4	5	4	5	4	4	4	3	5	5	1	5															4	4	4	5	4	4	2	4	5	2
0	4	5	5	3	3	5	4	3	5	3	4															4	4	4	4	3	4	2	3	4	2	4	4	2	4	4	4	4	4	3	4	2	3	4	2
0	3	4	2	4	3	4	4	3	4	4	4	2	4	2	4	2	3	4	3	3	4	3	3	3	3															4	3	2	3	2	3	4	2	3	3
0	5	5	4	5	3	5	2	4	5	1	5	5	5	5	5	4	5	2	4	5	1	5	5	1	5	4	5	5	5	4	5	3	4	5	2	5	5	1	5
0	5	5	5	5	5	5	5	5	5	5	5															5	5	5	5	5	5	1	5	5	1	5	5	1	5	5	5	5	5	5	5	1	5	5	1
0	4	5	2	4	2	5	4	4	4	2	5															3	3	4	4	4	4	2	4	4	2	4	4	1	4	2	4	2	3	4	4	2	4	4	2
0	4	4	4	4	4	5	3	4	4	3	4	4	4	3	2	2	4	2	3	4	3	4	4	4	4															4	2	2	2	3	3	2	4	3	3
0	5	1	5	3	1	4	1	1	3	3	4	5	1	5	2	3	1	1	3	1	3	4	1	3	3	5	3	1	4	1	1	3	3	4	1	3	4	1	4
0	2	4	5	4	3	5	1	3	2	3	4	4	5	2	2	4	3	4	1	1	4	3	2	4	5	4	5	3	5	3	2	4	1	3	4	5	1	2	3
0	5	2	4	3	3	4	1	4	4	5	1	5	1	3	3	1	4	5	4	5	3	3	3	5	2	5	3	3	4	5	4	5	3	2	2	5	1	5	5
0	4	4	3	4	4	4	5	4	4	5	5	3	4	3	3	3	3	4	4	3	2	3	4	1	4	4	5	5	5	4	5	1	2	5	1	5	5	1	5
0	5	5	5	5	5	5	4	5	5	4	5	4	3	4	3	4	4	3	4	4	3	4	4	2	4	4	4	3	4	4	4	4	4	4	3	4	4	2	4
0	2	4	3	1	4	3	4	5	4	3	5															2	3	4	2	4	3	5	5	3	3	3	1	5	2	4	2	4	3	3	4	3	2	4	2
0	4	4	3	2	3	4	5	4	4	5	5	2	4	4	4	4	5	1	5	4	1	4	5	1	4	3	4	5	4	3	5	5	4	5	4	4	4	1	4
0	4	4	5	3	5	5	4	3	4	4	4															3	4	4	3	3	2	3	4	4	3	4	4	3	5	3	5	5	3	4	4	4	4	5	4
0	4	3	4	4	2	4	5	5	5	4	4	3	4	3	3	3	4	4	4	4	3	4	4	3	3															4	3	4	4	4	3	3	4	3	2
0	3	4	4	3	5	5	2	4	2	4	4															3	4	4	3	4	2	5	5	3	5	5	3	4	2	4	2	4	3	3	4	5	3	5	3
0	5	5	5	5	5	5	5	5	5	4	5															5	3	5	5	5	5	2	5	5	5	5	5	1	5	5	5	5	1	5	5	2	4	5	1
0	2	4	2	4	3	4	5	4	4	5	4	1	1	1	1	2	1	3	1	2	3	2	3	2	3	2	2	5	4	2	4	4	4	4	4	5	5	1	5
0	2	4	3	3	4	3	5	2	5	1	4	4	2	2	3	3	2	2	5	4	5	4	1	4	4															4	2	5	4	3	3	3	3	4	2
0	4	4	4	4	4	4	4	4	4	4	4															4	3	3	3	4	4	3	4	4	4	4	4	2	4	4	2	2	2	4	3	2	4	3	2
0	4	5	5	1	3	5	2	5	5	2	5	4	4	4	3	4	4	1	4	3	2	5	4	1	4															5	5	5	5	5	5	1	4	5	1
0	4	5	4	5	4	4	4	4	4	4	4															5	5	5	5	5	4	1	5	5	1	5	5	1	5	5	5	5	1	5	5	1	5	5	1
0	5	4	4	4	4	4	4	4	4	4	5															4	4	4	4	5	4	3	4	4	4	4	4	2	4	4	4	3	4	4	4	3	4	3	4
0	2	2	2	2	3	3	1	2	4	4	2	3	4	2	2	3	3	1	2	1	2	2	1	2	1															2	3	3	1	1	1	1	2	3	2
0	2	3	1	5	4	2	3	2	1	3	4															1	2	1	2	5	2	4	4	1	5	4	3	4	3	2	3	1	3	4	1	4	4	1	4
0	3	5	4	4	4	5	5	4	4	5	4															3	2	2	4	4	5	4	4	1	2	5	5	1	5	3	5	4	4	4	5	1	4	5	1
0	4	4	4	4	4	4	4	3	4	4	5	4	4	4	3	2	4	2	2	4	2	5	5	2	4															4	4	4	4	3	4	4	3	4	3
0	2	2	2	4	3	2	4	4	2	4	2	3	2	2	3	2	3	3	2	3	2	2	3	3	3															2	2	2	2	2	2	2	2	2	2
0	3	3	4	4	5	5	4	1	2	2	4															1	4	5	2	3	4	4	3	2	5	5	4	2	3	3	5	5	4	1	2	4	2	3	4
0	3	4	3	5	4	4	4	4	5	3	4	4	4	3	3	4	3	4	2	3	4	3	3	3	3															3	4	3	3	4	3	3	4	4	4
0	5	4	3	5	4	5	5	4	4	5	5	4	4	4	4	4	4	2	4	4	2	5	5	1	5	5	4	4	4	4	4	2	5	4	2	5	5	1	5
0	5	5	5	5	5	5	5	5	5	5	5	5	5	5	5	5	5	5	5	5	1	5	5	1	5	5	5	5	5	5	5	5	5	5	5	5	5	1	5
0	4	4	4	3	4	4	3	4	4	4	4	5	4	4	4	4	5	2	4	5	1	4	4	2	4															4	4	4	4	4	4	2	4	4	2
0	3	3	3	4	3	3	3	3	3	3	4	3	3	3	4	4	3	3	4	3	4	4	4	4	4	4	4	4	4	4	4	4	3	4	2	4	4	2	4
0	4	4	4	2	4	4	4	4	4	4	5	4	4	4	4	4	4	4	4	4	4	4	4	4	4	3	3	3	3	3	3	3	3	3	3	3	3	3	3
0	5	5	5	4	4	5	4	4	5	5	4	4	5	4	5	4	4	5	4	5	5	5	4	4	5															4	3	5	4	5	3	5	4	4	4
0	5	5	5	5	5	5	5	5	5	5	5															3	5	5	5	5	5	1	5	5	1	5	5	1	5	5	5	5	5	5	5	1	5	5	1
0	4	4	3	3	3	4	4	3	4	4	4	3	2	2	2	2	3	2	3	3	2	4	4	1	4															3	2	3	3	3	4	2	3	3	2
0	4	5	4	3	4	4	4	4	4	4	5	4	4	4	4	4	4	2	4	4	2	4	4	2	4	4	4	4	4	4	4	4	5	5	2	5	5	1	5
0	4	5	3	3	3	5	3	3	4	2	4															4	4	3	4	3	4	2	3	5	2	5	5	2	4	4	4	3	4	3	4	2	3	4	2
0	4	4	4	3	3	4	4	4	4	4	4	4	3	4	3	4	4	2	5	4	2	4	4	1	4	4	3	5	4	3	4	2	4	4	2	4	4	2	4
0	4	4	3	4	3	4	2	4	4	3	5															4	3	4	3	4	4	2	4	4	2	5	4	1	4	4	3	3	3	4	4	2	4	4	2
0	4	4	4	4	4	4	4	4	4	4	4	3	4	3	4	4	3	4	4	3	4	3	3	2	3															4	4	4	4	4	4	2	4	4	2
0	4	5	5	5	5	5	4	4	5	4	5	4	5	5	5	5	4	2	4	4	3	5	5	1	5															5	5	5	5	5	5	1	5	5	2
0	4	5	4	4	3	4	3	4	4	3	5	4	4	4	4	3	4	2	4	4	2	5	5	2	4															3	4	3	4	3	3	2	4	3	2
0	4	4	3	5	2	3	2	2	5	3	1	2	3	1	2	4	2	5	1	4	1	2	1	4	3	3	2	1	2	3	2	1	2	3	1	2	3	1	2
0	4	2	4	5	4	4	4	3	3	3	3															5	4	5	5	5	5	2	4	4	1	5	5	1	5	5	5	5	5	5	5	1	5	5	1
0	3	4	4	4	4	4	2	4	4	2	4															3	4	4	4	4	4	1	4	4	1	5	5	1	4	4	4	4	4	4	4	2	4	4	2
0	5	4	5	2	4	5	4	4	5	4	4	4	4	3	4	4	4	2	5	4	2	3	4	1	4	5	5	5	4	4	5	4	4	4	4	5	5	2	5
0	4	4	4	4	3	4	4	3	4	4	3	3	2	2	2	3	3	4	2	3	4	3	3	3	3	4	4	4	4	4	4	4	4	4	4	4	4	2	4
0	3	3	2	3	3	2	4	3	2	4	4	2	3	1	3	3	2	2	3	2	2	4	4	1	3															4	3	2	2	3	1	1	4	2	2
0	3	3	3	3	3	3	3	3	3	3	5	3	3	3	3	3	3	3	3	3	3	3	3	3	3	1	3	3	3	3	3	3	3	3	3	3	3	3	3
0	3	4	2	5	2	3	4	4	3	4	4	2	3	2	3	3	2	4	3	2	4	3	3	2	3															3	4	3	4	3	3	2	4	3	2
0	5	5	5	4	5	5	5	5	5	5	5	5	4	5	4	5	5	1	5	5	1	5	5	1	5															4	5	4	5	5	4	1	5	4	1
0	3	3	3	2	3	3	3	3	3	3	3	2	3	3	3	3	3	4	2	3	3	3	4	2	4	3	3	4	3	3	4	3	3	4	2	4	4	2	4
0	3	4	3	3	3	4	3	3	4	3	5															4	4	4	5	3	5	3	3	4	1	5	5	1	5	3	4	3	4	3	4	2	2	3	1
0	3	3	1	3	3	4	4	4	2	3	4	4	4	4	4	4	4	4	4	4	4	5	5	1	5	4	4	4	4	4	4	4	4	4	4	4	3	4	3
0	5	4	4	5	4	5	5	5	5	5	5															5	5	4	4	4	5	5	4	5	4	5	4	5	5	5	5	5	4	4	5	4	5	5	4
0	5	5	5	5	5	5	4	5	5	4	5															5	5	4	5	5	4	4	5	4	4	5	5	1	5	5	5	5	5	5	5	1	5	5	1
0	4	5	4	5	4	5	4	5	3	4	5	4	4	5	4	4	3	4	5	5	5	4	5	5	4															2	4	4	3	4	5	3	5	5	5
0	4	5	4	4	5	5	4	4	5	5	5															4	5	5	5	5	5	2	5	5	5	5	5	1	5	5	5	5	5	5	5	2	5	5	2
0	4	4	4	4	5	5	5	5	4	5	5	5	5	4	4	4	4	4	5	5	5	5	4	4	5	4	5	4	4	5	5	4	5	5	4	5	5	4	4
0	5	5	5	4	5	5	3	4	5	4	5	5	3	5	5	4	5	3	5	4	3	5	5	2	5	5	1	5	3	5	4	1	4	5	1	2	5	1	5
0	3	5	3	4	4	4	2	3	5	3	5	3	3	4	3	4	4	2	4	4	2	4	4	2	4	3	4	3	3	4	3	4	4	3	4	3	3	2	3
0	5	5	5	4	4	5	5	5	5	5	5	5	4	4	5	5	4	1	5	4	1	5	5	1	5	2	4	3	4	4	5	4	4	4	4	5	5	1	5
0	4	5	5	5	4	4	5	4	5	5	3	5	4	4	5	5	4	5	5	5	4	4	4	5	5															5	5	5	5	5	5	5	5	5	5
0	4	4	3	4	4	4	4	4	4	4	4	3	3	4	3	4	3	4	3	4	3	4	4	2	4	4	3	4	4	3	3	3	4	4	4	4	4	4	4
0	3	4	3	4	3	4	3	4	3	3	3	2	3	2	3	3	2	3	4	2	2	3	3	3	3	3	3	4	3	3	2	4	3	3	4	3	4	2	4
0	4	4	4	4	3	4	4	3	5	5	4															5	4	4	4	5	5	5	4	4	4	5	5	2	5	4	5	3	4	3	4	3	3	3	4
0	5	5	4	4	5	5	5	5	5	5	5	5	5	5	5	4	5	4	4	5	4	5	5	3	5															4	5	1	4	3	1	4	3	1	3
0	4	5	3	4	4	4	4	4	4	4	4	4	4	3	4	4	4	2	4	3	3	4	4	2	4	4	4	4	2	4	4	4	4	4	2	4	4	2	4
0	4	4	4	4	4	4	4	4	4	3	4	4	4	4	5	4	4	4	4	4	4	4	4	4	4															4	4	4	4	4	4	4	4	4	4
0	4	5	5	4	4	5	4	5	5	4	5	4	4	4	4	4	4	4	4	4	3	4	4	2	4	5	4	4	5	4	4	2	4	4	2	5	5	1	4
0	5	5	5	3	3	5	5	4	5	5	5															4	4	4	4	3	4	4	3	3	4	4	4	2	4	4	4	4	4	3	5	2	4	4	2
0	3	3	3	3	3	3	3	3	3	3	4															3	4	3	4	3	3	3	3	3	3	3	3	3	3	3	3	3	3	3	3	3	3	3	3
0	4	5	4	4	4	4	4	5	4	5	4	4	4	4	4	4	5	2	4	4	2	4	4	2	4															4	4	4	4	4	4	3	4	4	4
0	3	4	3	4	3	4	2	3	4	3	4															4	3	3	3	3	4	3	3	3	3	4	3	3	3	4	4	3	3	3	4	4	3	4	4
0	5	5	4	4	4	5	5	4	5	5	5	5	5	5	4	5	4	5	4	5	4	5	4	5	5	5	4	5	5	5	5	5	4	4	4	5	4	5	5
0	4	3	4	3	3	4	4	2	4	3	5	4	3	4	3	3	4	3	3	4	2	5	5	2	5															5	3	4	3	3	4	4	3	4	2
0	4	5	3	5	4	4	4	4	4	5	4															5	4	5	5	5	5	2	5	4	2	5	5	2	5	4	5	4	4	4	4	2	4	4	2
0	1	3	4	3	5	4	2	2	3	4	3															2	4	4	2	5	3	3	4	3	1	3	4	4	5	5	4	5	2	4	5	1	3	2	3
0	4	4	4	3	4	4	4	4	4	4	4	4	4	4	4	4	4	4	4	4	2	4	4	2	4															4	4	4	4	4	4	2	4	4	2
0	3	4	3	4	3	4	2	4	4	2	4	3	4	3	4	4	4	2	4	4	2	4	4	1	4															4	4	3	4	3	4	2	4	3	2
0	5	5	5	5	5	5	2	5	5	2	5	4	4	4	4	4	4	4	4	4	5	4	4	4	4															5	5	4	4	4	4	4	4	5	2
0	5	5	4	4	3	5	2	4	4	2	4	5	4	5	4	4	5	1	4	5	1	5	5	1	5															5	4	4	4	4	4	2	4	4	1
0	5	5	5	2	5	5	4	5	5	5	5	5	4	5	3	4	5	3	5	5	2	5	5	1	5															4	4	4	3	3	3	2	3	3	2
0	3	5	4	5	5	5	4	4	5	5	5															4	2	4	1	4	2	4	5	4	2	4	4	2	4	4	4	4	2	4	4	2	4	4	2
0	4	5	4	4	4	5	5	5	5	5	5	3	3	4	3	3	4	3	3	4	2	3	4	2	4	4	4	4	4	4	4	4	4	4	5	5	5	2	5
0	4	2	2	5	5	4	4	5	4	4	3	5	4	4	4	5	4	4	5	5	2	5	5	1	5	5	4	3	3	4	5	3	5	5	4	5	5	1	5
0	4	5	4	4	3	4	4	3	4	4	5	4	3	4	4	4	4	2	3	4	2	4	4	2	4															4	3	3	4	3	4	3	4	3	3
0	5	5	5	2	4	5	4	4	5	4	5	5	4	4	4	5	5	2	5	5	2	5	5	1	5	4	1	5	2	4	5	2	4	5	1	5	5	1	5
0	4	4	4	3	3	5	5	4	5	5	4															4	4	3	5	3	2	5	5	4	5	5	5	3	5	5	5	5	5	3	5	5	3	5	5
0	5	5	5	2	5	5	4	4	5	5	5															5	3	5	2	5	5	1	5	5	1	5	5	1	5	5	2	5	2	5	5	1	5	4	2
0	5	5	5	5	5	5	4	4	5	4	5	4	4	4	4	4	4	4	4	4	4	4	4	2	4	5	5	5	5	5	5	1	5	5	1	5	5	1	5
0	3	3	3	3	5	5	3	3	3	5	5															2	3	3	5	3	3	3	5	3	3	3	5	1	3	3	3	3	3	3	3	3	3	3	3
0	4	5	4	4	5	5	4	5	4	4	5	4	3	3	3	4	3	3	4	3	4	4	4	1	4	3	3	3	4	4	4	4	4	3	4	4	4	1	4
0	5	5	5	2	5	5	4	4	5	4	5															5	4	4	5	4	5	2	4	4	3	4	5	1	4	4	4	4	3	4	5	3	4	4	3
0	4	4	3	4	2	4	5	2	4	4	5	4	4	2	4	2	3	4	2	3	4	3	4	2	4															4	5	5	5	2	5	2	2	4	1
0	4	5	4	5	4	5	2	3	5	2	5	4	4	4	4	4	4	1	4	5	1	5	5	1	5															4	5	3	5	4	4	2	4	4	2
0	4	5	4	3	4	5	4	4	4	2	5	3	4	3	3	4	4	2	4	4	2	4	5	1	4															3	4	4	4	4	4	2	4	4	2
0	4	4	2	5	4	4	5	4	4	4	4	4	4	2	4	4	4	4	4	3	2	4	4	2	4															2	2	2	2	4	3	2	4	2	2
0	4	5	4	4	4	4	5	4	5	4	5	4	4	4	4	4	4	2	4	4	2	4	4	1	4															4	5	4	5	4	4	2	4	4	2
0	4	4	3	4	4	4	4	4	4	4	4	4	3	3	5	3	3	2	5	3	3	3	3	3	3															4	3	4	4	4	3	3	3	4	3
0	4	5	4	2	4	5	4	4	4	5	5	3	3	4	3	4	4	3	4	4	2	4	4	1	4															4	4	4	4	4	4	2	4	4	2
0	4	4	4	5	4	5	4	4	5	4	5	3	4	3	4	4	4	2	4	4	4	4	4	4	4															4	4	4	4	4	4	2	4	4	1
0	5	5	5	5	5	5	5	5	5	5	5	5	5	5	5	5	5	4	5	5	5	5	5	1	5	5	5	5	5	5	5	1	5	5	1	5	5	1	5
0	4	4	3	4	4	4	4	4	4	4	4	4	4	4	4	4	4	4	4	4	4	4	4	4	4	4	4	4	4	4	4	4	4	4	4	4	4	4	4
0	4	4	4	5	4	4	4	4	5	3	5	4	3	3	2	4	3	3	4	4	3	4	4	2	4	3	3	3	3	3	4	2	3	4	2	4	4	2	4
0	3	3	4	4	4	3	4	4	4	2	4	2	3	2	3	3	2	4	3	3	4	3	3	3	4															3	3	2	3	3	3	2	2	3	2
0	3	4	3	4	3	4	4	4	4	4	4	4	3	4	4	4	4	3	4	4	3	4	4	1	4															3	4	2	4	3	2	4	3	3	4
0	4	5	3	5	3	5	4	3	5	5	5	4	4	4	4	3	4	4	3	3	4	4	3	1	4															3	4	3	4	4	4	4	3	4	4
0	3	4	2	5	4	5	3	4	4	2	4	4	3	2	4	3	4	3	3	4	4	4	4	1	4	4	4	4	4	4	4	3	4	4	2	5	5	1	4
0	5	5	4	4	5	5	4	5	5	2	5	4	5	4	4	4	4	2	4	4	2	4	4	1	4															4	4	4	4	5	4	2	4	4	2
0	5	5	4	4	4	5	5	4	5	5	5	4	4	4	2	4	5	1	4	4	1	5	5	1	5	4	4	4	3	3	4	1	4	4	1	5	5	1	5
0	4	4	3	3	3	3	3	3	5	4	5															3	3	3	4	3	3	4	2	4	5	4	5	3	4	4	4	5	5	3	3	4	3	4	5
0	5	4	5	3	5	5	3	4	5	3	5	4	3	3	3	4	4	2	4	4	2	4	4	1	4															4	4	4	3	4	4	2	4	4	2
0	4	2	3	4	3	3	4	3	3	4	4															3	4	4	4	4	4	2	4	4	2	4	4	2	4	4	4	3	4	4	4	2	4	3	2
0	4	4	4	4	4	4	4	4	4	4	4															4	4	4	4	4	4	2	4	4	4	4	4	2	4	4	2	3	2	4	4	2	4	3	2
0	3	4	2	3	4	3	4	4	3	4	3	2	4	2	4	4	4	2	4	2	2	3	3	2	3	3	4	3	5	4	3	2	4	4	2	5	4	1	4
0	4	4	4	4	4	4	4	4	4	4	4															4	4	4	4	4	4	4	4	4	4	4	4	2	4	4	4	4	4	4	4	3	4	4	4
0	4	4	4	4	4	4	4	4	4	3	4	4	4	3	4	4	4	2	4	4	3	4	4	2	4	5	5	5	5	5	5	1	5	5	1	5	5	1	5
0	4	4	3	4	4	4	3	4	4	4	4	3	4	3	3	2	3	4	2	3	3	4	3	4	4															4	2	4	4	2	4	3	2	3	3
0	3	3	2	5	3	3	2	3	3	3	3	4	4	4	3	3	3	2	3	4	4	4	4	1	4															4	4	4	4	3	4	2	3	4	2
0	5	5	4	5	2	4	5	3	4	5	5															5	4	4	2	2	4	2	5	5	2	5	5	1	5	5	5	5	5	4	2	2	5	5	3
0	5	4	3	2	4	4	5	4	4	5	4															5	5	4	5	5	4	2	5	5	1	5	5	1	5	4	4	3	4	3	3	4	3	3	4
0	5	5	5	5	5	5	5	5	5	5	5	5	5	5	5	5	5	2	4	4	2	4	5	1	4	5	5	5	5	5	5	2	5	5	2	5	5	2	5
0	3	4	2	4	3	3	3	3	4	3	3	3	4	2	3	3	4	3	3	4	4	4	5	1	4	5	4	4	5	4	5	2	5	5	1	5	5	1	5
0	4	5	4	5	4	5	4	5	5	4	5	3	5	4	4	4	4	3	5	4	4	4	4	3	4															4	4	4	4	4	4	4	4	4	4
0	4	5	4	5	5	4	4	5	5	4	4	4	4	3	4	4	4	2	4	4	2	4	5	1	5															4	5	4	5	4	4	2	4	4	2
0	5	3	5	3	3	5	3	3	5	3	5	4	3	3	3	3	4	2	4	2	2	4	4	2	4	3	3	4	2	4	4	2	3	4	3	5	5	2	5
0	3	3	2	3	2	2	4	2	3	2	3	2	2	2	3	2	3	3	3	3	3	3	3	2	3	3	3	4	4	3	4	2	4	4	2	5	5	2	5
0	4	5	4	2	3	4	5	3	4	5	5															4	4	3	4	4	4	2	4	3	2	5	4	2	5	3	5	3	4	4	3	3	4	2	3
0	4	4	4	4	4	4	4	4	4	4	4															4	3	4	4	3	4	2	3	4	2	4	4	2	4	3	4	3	3	3	4	2	4	4	2
0	3	3	3	2	3	3	4	4	3	3	4	3	4	4	4	4	4	4	3	4	3	3	3	3	3	5	5	5	5	5	5	5	5	5	5	5	5	5	5
0	5	5	5	5	5	5	1	5	5	4	5	5	5	5	4	5	5	2	5	5	2	5	5	1	5															5	5	5	5	5	5	2	5	5	5
0	5	5	4	5	5	4	5	5	5	4	5	4	4	3	4	5	4	4	3	5	4	3	4	4	3	5	5	4	4	4	4	5	5	4	4	4	5	4	3
0	4	4	4	4	2	5	5	3	4	4	4															3	4	4	3	2	4	2	4	4	2	4	4	2	5	4	4	4	4	3	4	2	3	4	3
0	4	4	5	4	5	5	5	4	4	4	5															4	4	5	4	5	5	4	4	4	5	4	5	5	4	4	4	4	5	4	5	5	4	5	4
0	4	3	4	4	4	4	4	4	4	4	4	3	3	3	3	3	4	4	3	3	2	4	3	2	3	5	5	5	5	5	5	2	5	5	1	5	5	2	5
0	3	3	3	3	3	3	3	4	4	3	3	4	4	3	4	4	4	3	3	4	4	3	3	3	3	3	4	4	3	4	4	4	3	3	3	4	3	3	3
0	2	5	4	3	4	4	4	4	4	4	5	3	3	3	3	4	3	3	4	3	3	4	4	1	4	3	5	4	4	4	5	1	4	4	1	5	5	1	5
0	4	3	4	3	4	4	3	4	4	3	4	3	3	3	3	3	3	3	3	3	3	3	3	3	3															3	3	2	3	3	2	4	2	3	3
0	3	1	3	1	4	4	5	3	1	1	4															4	3	4	1	1	1	5	4	3	1	1	1	4	3	1	3	1	4	3	3	3	5	1	3
0	4	5	4	4	4	4	5	4	4	5	5	4	4	3	4	4	3	4	4	4	4	4	4	2	4	4	5	4	4	4	4	4	4	5	4	4	4	2	4
0	2	2	2	4	1	1	4	1	1	3	5	3	2	1	1	1	2	1	1	2	2	3	3	3	3	3	3	2	3	2	1	3	2	3	4	3	3	3	3
0	4	4	4	3	4	4	3	4	4	2	4															4	4	4	4	4	4	2	4	4	2	3	4	2	4	4	4	4	4	4	4	3	4	4	3
0	3	4	4	2	4	4	2	4	4	2	4	4	4	4	2	4	4	2	4	4	2	4	4	2	4															4	2	4	2	4	4	2	4	4	2
0	4	5	5	4	5	5	5	4	4	4	4															4	5	5	5	4	4	4	4	5	5	5	4	4	5	4	4	4	5	5	4	4	5	5	5
0	3	3	3	2	2	4	5	2	3	5	3	4	4	2	4	4	4	5	4	4	5	4	4	1	4	4	5	5	4	5	5	4	5	4	4	5	5	1	5
0	4	4	4	4	3	4	4	4	4	4	4	3	3	3	3	3	3	4	4	3	4	4	4	2	4	4	4	4	4	4	4	4	4	4	4	5	5	1	4
0	2	2	2	4	2	2	2	2	2	2	2	2	2	2	2	2	2	2	2	2	2	2	2	4	2															4	4	2	4	2	4	2	2	4	2
0	3	4	4	3	3	4	4	3	4	4	4															3	3	3	3	3	3	3	3	4	2	3	3	3	3	3	3	3	3	3	4	4	3	4	3
0	3	2	4	5	3	5	2	1	4	1	5	1	4	2	5	1	5	3	2	4	3	4	2	5	3															4	3	1	2	3	1	4	5	2	5
0	4	4	4	3	4	4	4	3	4	4	4	4	3	4	4	4	4	3	3	4	3	4	4	2	4															4	4	3	4	3	4	4	3	4	3
0	3	1	5	5	4	4	2	1	3	2	1	5	4	3	3	3	1	3	4	5	2	5	3	4	4	5	5	3	4	1	4	3	2	2	1	5	4	4	3
0	4	5	3	5	4	5	4	4	5	5	5	1	4	2	4	2	2	4	1	2	3	4	3	1	3	5	3	4	4	3	5	2	3	5	5	5	5	2	5
0	3	5	4	4	4	5	5	4	4	4	5															4	4	3	4	4	5	4	4	4	4	5	5	1	5	4	4	4	4	4	4	3	4	4	3
0	3	5	3	4	4	1	2	4	5	2	2	4	2	4	1	2	3	2	3	4	3	2	3	3	4															4	5	2	2	5	3	4	3	3	1
0	3	5	2	3	2	1	3	4	5	4	4	5	3	3	4	5	2	4	1	2	2	5	4	3	1	3	5	4	4	5	2	2	3	1	3	4	3	2	5
0	4	4	4	2	3	4	5	2	4	5	4															4	3	4	3	2	4	4	2	4	2	4	4	1	4	2	3	3	3	2	2	5	2	2	2
0	4	4	3	2	4	5	5	3	5	5	3	2	3	2	2	4	2	5	4	2	4	2	2	2	2															2	5	1	5	4	1	2	4	1	2
0	5	5	5	4	4	4	5	4	4	5	4	4	2	2	2	3	2	3	2	2	3	4	4	2	4															5	3	4	4	3	3	2	4	3	2
0	4	5	4	4	5	4	2	5	5	1	4	5	5	5	5	5	5	5	5	5	1	5	5	1	5															5	4	5	4	5	4	1	5	4	1
0	4	4	4	3	4	4	4	4	4	5	4	4	2	4	2	4	4	4	4	4	3	4	3	1	4															4	2	4	2	4	4	2	4	4	2
0	1	2	4	1	1	1	4	4	5	2	5	5	4	2	2	3	3	3	1	5	1	3	4	2	4	1	1	5	3	3	3	1	4	1	1	3	3	4	1
0	3	4	4	4	4	4	3	4	4	3	4															3	3	4	3	3	3	2	4	4	2	4	4	2	3	3	4	3	4	4	3	3	4	3	3
0	3	4	3	4	4	4	4	4	4	4	4	3	3	3	3	4	4	4	4	3	4	3	3	3	3															2	3	3	3	3	3	4	3	3	4
0	5	5	5	5	5	5	4	5	5	4	5	5	4	5	4	4	5	1	5	5	1	5	5	1	5															5	4	4	4	5	4	2	5	5	2
0	5	4	5	4	4	4	5	5	4	4	4	5	4	4	5	4	4	5	4	4	5	5	4	1	4															4	5	5	5	4	5	2	4	5	2
0	4	5	1	1	3	4	3	3	1	3	4	3	3	5	3	1	1	1	4	3	3	3	5	3	4	5	1	1	3	3	4	1	3	3	1	3	1	1	4
0	4	5	4	5	3	5	4	3	5	4	5	4	4	4	4	4	4	2	4	4	4	5	5	1	5	4	5	4	5	4	5	5	4	5	2	4	5	2	4
0	4	4	3	4	3	4	3	3	4	3	4	3	3	3	2	2	4	3	2	3	3	3	3	3	4	4	3	4	3	4	4	3	3	4	3	4	4	3	4
0	4	3	4	3	3	4	5	4	4	4	4	3	3	3	2	5	3	4	4	3	3	4	4	2	4	3	3	4	3	4	5	2	4	4	1	5	5	1	5
0	4	4	4	4	4	4	4	4	4	4	4	4	4	4	4	4	4	4	4	4	4	4	4	4	4															4	4	4	4	4	4	4	4	4	4
0	4	4	4	4	4	4	4	4	4	5	4	4	5	5	3	5	5	5	2	5	2	5	5	5	5															3	4	3	4	4	4	2	4	3	3
0	5	5	5	2	5	5	5	5	5	5	5	2	3	1	2	4	2	5	2	1	4	2	2	5	1	5	5	5	5	5	5	4	4	5	2	5	5	1	5
0	2	3	1	4	5	2	5	4	1	4	2	1	2	1	1	4	1	2	4	1	2	2	2	2	2	1	2	1	2	4	4	1	4	2	1	4	4	2	4
0	4	4	4	5	4	5	4	4	4	4	4	4	4	4	4	5	4	2	5	4	2	5	5	1	5	4	5	5	5	4	4	3	3	4	3	4	4	2	4
0	4	4	4	4	5	5	5	5	5	5	4															5	4	4	5	4	5	5	4	5	5	4	5	5	5	5	4	5	4	5	4	4	4	4	5
0	4	4	4	2	2	4	4	4	4	4	4	4	4	4	4	2	4	2	4	4	2	4	4	2	4															4	4	4	4	2	4	4	4	4	4
0	4	4	4	3	4	4	4	4	4	4	4	3	4	3	4	3	3	2	2	3	2	3	3	3	4															4	4	3	4	3	4	2	3	4	2
0	5	4	4	5	5	5	4	4	4	5	4															3	4	4	3	3	4	4	4	3	4	4	4	3	4	4	3	3	4	3	4	4	3	3	4
0	3	3	3	3	3	3	3	3	4	3	4															3	3	3	3	3	4	3	4	4	3	4	4	3	4	2	3	2	2	2	2	3	3	2	3
0	5	5	3	4	4	4	5	4	3	4	3	5	5	3	2	3	4	4	4	2	4	4	4	3	5	3	5	5	4	3	3	4	4	4	4	4	2	5	3
0	1	4	3	5	1	1	1	5	3	4	1	5	4	1	1	4	1	3	3	1	1	3	4	1	3															1	4	1	5	1	1	4	1	3	3
0	5	5	5	4	5	5	4	5	5	4	5															5	4	4	3	4	4	5	5	4	4	5	4	1	5	4	4	5	4	5	5	2	4	4	2
0	4	4	4	4	3	5	4	4	4	4	5	4	3	4	4	4	4	4	4	4	3	5	5	1	5	3	4	5	3	4	4	2	4	5	1	5	5	1	5
0	4	3	3	4	3	3	4	3	3	4	3	2	2	2	2	2	2	2	2	2	2	3	3	3	3															4	3	3	3	3	4	2	2	3	2
0	3	4	3	2	3	4	4	3	4	4	5															3	3	5	5	4	4	2	4	1	3	4	4	1	4	3	3	4	5	4	4	3	4	4	1
0	1	1	3	1	4	1	3	5	1	3	1	1	1	1	1	2	4	1	2	4	4	3	3	4	1															1	1	4	4	1	4	2	1	4	1
0	4	4	3	3	3	4	2	3	4	4	4	3	3	2	4	4	3	4	4	2	3	2	3	4	3	3	3	4	4	4	4	2	4	4	2	4	4	1	4
0	3	4	2	4	4	4	5	4	4	4	4	2	4	2	2	4	3	4	4	3	2	4	4	2	3															3	4	2	4	4	3	4	4	3	4
0	5	4	3	4	2	3	5	3	4	3	3	2	2	3	3	4	4	2	3	3	4	4	4	2	5															3	4	2	2	3	3	4	3	4	2
0	4	5	4	5	5	5	5	5	5	5	4	5	5	4	5	4	4	5	5	4	5	5	5	4	5	4	5	5	5	5	4	4	5	4	5	5	4	5	5
0	3	4	4	4	4	4	3	4	4	4	4															4	4	4	4	4	4	2	4	4	2	4	4	2	4	3	4	3	2	3	3	2	3	3	2
0	4	4	3	2	4	5	2	4	4	2	5															4	4	4	4	4	4	2	4	4	2	4	4	2	4	4	2	4	5	4	5	1	4	4	1
0	5	5	5	4	4	5	4	5	4	5	4															5	4	4	5	5	4	5	4	5	5	5	4	5	5	5	4	5	4	5	5	5	4	4	4
0	3	4	3	5	4	3	4	4	3	4	4															2	4	3	2	3	4	2	3	4	2	5	5	1	5	4	4	3	3	3	3	2	3	3	2
0	3	3	2	4	1	2	5	4	2	1	2	4	1	3	3	2	4	2	2	4	3	5	4	2	3															1	3	2	2	3	5	1	2	3	4
0	4	5	5	4	4	4	4	5	5	4	5	4	4	4	5	4	5	5	4	4	4	5	5	5	5	5	5	5	4	5	4	5	5	5	4	5	4	5	4
0	5	5	5	4	4	4	5	5	5	5	5	5	5	4	4	5	4	5	5	4	4	5	4	5	5															5	4	5	5	4	5	5	5	4	5
0	4	3	3	5	5	4	5	4	5	4	4															5	3	4	3	3	5	4	4	5	4	4	5	4	4	5	4	5	4	3	4	4	3	5	4
0	4	4	4	2	4	4	3	4	4	4	4															4	4	4	3	4	4	2	3	4	2	4	4	2	4	4	3	4	3	3	4	2	3	3	2
0	5	5	5	5	4	5	2	5	5	2	5	4	4	3	4	4	4	2	4	4	2	4	4	1	4	5	5	5	5	5	5	1	5	5	1	5	5	1	5
0	5	5	5	5	5	5	5	5	5	5	5	5	5	5	5	5	5	5	5	5	5	5	5	5	5															5	5	5	5	5	5	5	5	5	5
0	5	2	4	3	2	3	1	4	3	2	4															2	1	4	4	2	3	3	5	3	4	4	3	5	3	3	3	5	2	3	4	1	2	4	4
0	3	3	4	1	2	5	5	2	4	4	1	5	3	4	2	4	1	3	4	2	5	5	2	3	4	1	3	2	4	5	4	4	5	2	3	5	3	2	4
0	4	2	2	5	3	4	3	2	1	3	3	4	2	4	3	5	3	3	1	2	2	1	3	4	2															2	1	2	2	3	5	4	3	4	3
0	1	2	4	3	4	1	2	3	5	2	4	5	2	1	4	2	1	4	2	3	3	5	2	3	4															2	3	4	2	2	5	1	1	4	3
0	4	4	4	4	4	4	4	4	4	4	4	4	4	4	4	4	4	4	4	4	4	4	4	4	4	4	4	4	4	4	4	4	4	4	4	4	4	4	4
0	5	5	3	5	5	5	1	5	5	1	5															5	5	5	5	5	5	4	5	5	1	5	5	1	5	1	5	1	5	5	1	5	5	1	5
0	5	4	4	2	4	4	5	4	4	5	5	4	2	4	2	4	4	2	4	4	2	4	4	2	4															4	5	4	2	4	4	4	4	4	2
0	5	5	5	5	3	5	5	5	5	5	5															5	5	5	2	3	5	1	5	5	2	5	5	1	5	5	1	2	1	3	4	2	3	4	1
0	4	3	3	2	4	4	4	4	4	4	3	4	3	3	2	4	4	3	4	4	3	3	4	2	4	3	3	3	3	4	3	4	4	3	4	3	3	3	3
0	2	4	5	3	4	4	2	1	3	5	4	3	1	3	3	3	3	3	3	4	2	4	3	3	4	5	5	3	5	4	4	3	3	5	4	4	3	3	3
0	3	4	4	4	3	5	3	3	5	3	5	2	4	3	4	3	4	2	3	4	2	4	3	1	4															3	5	3	4	3	4	2	4	4	3
0	4	5	4	5	4	4	5	4	4	4	5															4	4	4	4	4	5	4	4	5	4	4	5	1	4	4	5	4	5	4	5	1	4	5	1
0	5	5	5	2	5	5	5	5	5	5	5	2	5	4	5	5	4	5	5	4	1	3	4	1	4	5	1	5	1	5	5	1	5	5	1	5	5	1	5
0	3	5	4	5	4	5	3	4	5	4	5	1	2	1	1	3	1	3	3	2	4	2	2	2	2	4	2	3	3	3	3	2	3	3	2	4	4	2	4
0	5	5	5	5	5	5	5	5	5	5	5															5	5	5	5	5	5	5	5	5	5	5	5	5	5	5	5	5	5	5	5	5	5	5	5
0	4	5	4	5	4	4	5	5	4	4	5	3	2	3	3	5	4	2	5	4	2	4	4	1	4	3	4	4	4	4	4	2	4	4	2	4	4	1	4
0	4	4	4	4	4	4	4	4	4	4	4															3	4	3	4	4	3	4	4	3	4	4	4	2	4	3	4	4	4	4	4	4	4	4	4
0	4	5	3	5	5	4	2	4	4	4	5	4	4	2	4	4	4	2	4	4	2	5	5	1	5	4	5	4	5	4	5	2	4	5	2	5	5	1	5
0	2	4	2	4	2	4	2	2	4	2	5	2	3	3	3	2	2	2	2	2	2	3	4	2	2															1	1	2	2	2	2	2	2	2	2
0	4	5	5	3	4	5	5	4	4	4	5															4	4	4	5	4	4	2	4	4	2	4	4	1	4	3	5	4	5	4	4	2	4	4	2
0	2	2	2	2	2	2	4	2	2	4	3	1	1	1	2	2	2	2	2	2	2	2	2	2	2															2	2	2	2	2	2	2	2	2	2
0	4	4	3	4	2	4	2	2	4	2	4	2	2	2	2	2	2	2	2	2	2	4	4	2	4															4	4	2	4	2	2	2	2	3	2
0	4	4	4	4	4	4	3	4	4	4	4															4	4	4	4	4	4	3	3	4	2	4	4	2	4	4	4	3	4	3	3	3	3	3	2
0	3	3	2	3	2	3	4	3	3	4	3	3	3	3	3	3	3	3	3	3	3	4	4	2	4	3	3	4	4	3	4	3	3	4	4	4	4	2	4
0	3	4	3	4	3	4	4	3	4	4	4															3	4	4	4	3	4	2	3	4	2	4	4	2	4	3	4	2	3	3	3	2	3	3	2
0	3	3	3	3	2	3	4	2	4	4	3															4	4	4	4	4	4	2	4	4	2	4	4	1	4	4	4	3	4	2	4	2	2	4	2
0	3	4	4	4	3	4	3	3	4	3	4	1	3	1	3	3	1	3	3	2	2	2	2	5	3	4	4	4	4	4	4	4	4	4	4	5	5	1	5
0	2	2	1	5	3	3	4	3	2	4	3	1	2	1	2	1	1	1	1	2	1	1	1	5	1	5	5	5	4	5	5	1	5	5	1	5	5	1	5
0	4	5	5	5	4	5	3	4	5	4	5	3	3	2	3	2	3	2	2	3	3	2	2	4	2	3	4	3	5	3	3	5	2	5	4	5	5	3	5
0	3	3	2	2	3	3	5	1	2	5	3	3	2	1	3	3	3	2	2	3	4	3	3	3	3	3	3	3	4	3	4	2	1	3	2	4	3	2	4
0	2	3	2	4	3	3	4	3	3	3	3	2	2	1	3	3	2	3	3	2	3	2	3	3	2	3	3	3	3	3	3	3	3	3	3	4	4	2	4
0	2	3	2	4	3	3	3	2	3	3	4															3	4	3	5	4	4	2	2	4	2	5	5	1	5	1	3	2	3	4	3	1	3	3	1
0	4	4	4	4	4	4	5	4	4	5	5	4	4	4	4	4	4	5	4	4	4	3	4	3	3															5	5	5	5	5	5	5	5	5	5
0	3	3	2	4	2	3	4	3	3	4	4	3	3	2	3	3	3	2	3	3	2	4	4	2	4															3	4	3	4	3	3	2	3	3	2
0	4	5	5	5	3	5	4	4	5	3	5	4	3	3	5	3	4	3	2	4	4	4	4	3	4	5	5	5	4	4	4	3	2	5	2	5	5	1	5
0	3	4	2	4	3	4	4	3	3	5	4															2	4	2	4	3	4	5	2	4	5	4	4	2	5	3	4	3	4	3	2	4	4	3	5
0	4	3	4	4	3	4	3	4	4	4	3	3	2	2	3	4	4	3	4	3	4	4	4	2	3	5	4	4	2	5	5	1	3	5	2	5	5	1	5
0	4	4	3	4	3	4	5	3	4	5	5	3	4	3	3	4	4	2	4	3	2	5	5	2	4															4	5	4	4	3	4	2	4	4	2
0	5	5	5	5	5	5	5	5	5	5	5	5	5	4	4	4	5	4	5	4	4	4	4	4	4															4	4	4	3	4	4	4	4	4	4
0	4	3	3	1	2	2	3	3	3	5	2	2	3	4	3	1	1	3	2	5	3	4	5	2	3															3	2	5	4	1	3	2	3	1	3
0	3	4	3	4	3	3	3	3	4	4	4															4	4	4	4	4	4	4	3	4	2	5	3	2	3	3	3	3	3	3	3	3	4	3	3
0	4	5	4	4	3	5	4	4	4	4	4															4	4	4	4	4	4	4	4	4	5	5	5	2	5	5	5	5	5	5	5	5	5	5	2
0	4	3	2	4	4	4	4	4	4	4	4	4	2	2	3	4	4	2	4	4	2	5	5	1	5	4	4	4	3	3	4	1	3	4	2	4	5	2	4
0	3	2	2	3	2	2	3	2	2	3	3	3	2	2	2	2	3	3	2	2	3	4	4	2	4	3	4	2	2	2	3	4	2	2	4	4	4	2	4
0	1	1	1	3	2	1	3	3	1	5	1															2	5	4	1	3	1	1	5	4	1	5	4	1	3	4	2	4	3	3	1	1	1	5	1
0	3	4	4	4	3	5	5	4	4	5	5	4	4	4	5	5	5	5	5	5	5	5	5	1	5	5	5	5	5	5	5	5	5	5	5	5	5	1	5
0	4	5	5	4	3	3	3	4	1	4	5	3	4	2	1	5	5	2	3	2	3	1	3	4	2															3	2	4	3	2	3	1	2	5	4
0	5	4	4	4	5	5	5	5	4	5	5	5	5	5	5	5	4	5	5	4	4	5	5	5	5															4	5	5	5	4	4	5	4	5	5
0	4	5	4	4	3	5	1	2	3	2	2	3	2	3	5	3	5	1	4	4	2	3	5	4	2	5	2	3	2	4	4	4	5	1	3	3	5	4	2
0	3	5	3	5	4	4	2	4	4	2	4															3	4	3	4	2	4	2	3	4	2	4	4	2	4	3	4	3	4	4	4	2	4	3	4
0	5	5	5	5	5	5	4	5	5	4	5	5	5	5	5	5	5	2	5	5	2	5	5	1	5															5	5	5	5	5	5	1	5	5	1
0	4	3	3	3	3	4	4	4	4	4	4	4	3	4	4	4	4	3	4	4	2	4	4	2	4	4	4	5	4	5	4	2	4	5	2	4	5	2	5
0	4	4	5	4	4	4	4	4	4	4	3	2	2	2	2	2	2	2	2	2	2	2	3	4	5	3	3	3	3	3	3	3	3	3	3	5	4	3	4
0	3	4	2	4	4	3	5	4	2	5	4	2	3	1	3	4	2	2	2	2	3	3	3	1	3															4	5	1	5	4	3	4	4	3	4
0	4	4	4	5	4	4	4	4	4	4	4	3	4	4	4	4	4	4	4	4	2	4	4	2	4	5	5	5	4	5	4	3	4	4	2	5	5	1	5
0	5	5	5	2	5	5	5	4	5	5	5															5	5	5	4	5	5	1	5	5	1	5	5	1	5	5	5	5	4	5	5	2	4	5	2
0	5	3	4	5	3	4	3	4	4	4	4															4	5	4	5	4	4	5	4	4	5	4	4	5	3	4	4	4	5	4	4	4	3	3	5
0	4	4	4	2	4	4	4	4	4	4	4	4	3	3	3	4	4	2	4	4	2	4	4	2	4															3	4	3	4	4	4	4	4	4	4
0	4	4	4	4	4	5	4	4	4	4	5	3	3	3	3	3	3	3	3	3	3	3	3	3	3															3	3	3	3	3	3	3	3	3	3
0	5	5	5	5	5	5	5	5	5	5	5															5	5	5	5	5	5	5	5	5	5	5	5	5	5	5	5	5	5	5	5	5	5	5	5
0	4	4	4	4	4	4	4	4	4	4	4	4	4	4	4	4	4	4	4	4	4	4	4	4	4															4	3	4	3	4	2	3	3	4	3
0	1	1	1	1	3	1	4	2	1	4	1	1	1	1	1	3	1	1	4	1	1	1	1	5	1															1	1	1	1	3	1	1	3	1	1
0	5	5	5	5	5	5	5	4	5	3	5															5	5	5	5	4	5	5	4	5	3	5	5	1	5	5	5	5	5	5	5	5	3	5	5
0	4	5	4	1	4	4	2	4	5	2	5	4	4	4	2	4	4	1	4	4	1	4	4	1	4															3	3	4	3	5	5	1	4	4	1
0	5	5	5	5	5	5	5	5	5	5	5	5	5	5	5	5	5	5	5	5	5	5	5	2	5															3	4	3	4	4	4	3	3	3	4
0	5	4	3	5	4	4	3	4	4	4	4															5	5	5	5	5	5	1	5	5	1	5	5	1	5	5	5	5	5	5	5	1	5	5	1
0	1	2	1	3	2	2	2	3	3	2	3															2	3	1	2	2	2	4	3	1	2	2	3	2	1	1	2	3	4	1	1	2	4	5	3
0	5	5	4	4	4	5	5	5	5	5	4															5	5	4	4	4	4	4	5	5	1	4	4	2	4	3	4	4	5	4	4	3	4	4	4
0	4	4	4	2	4	4	5	4	4	4	5	3	4	3	3	4	4	2	4	4	1	4	4	1	4															4	4	4	4	4	4	2	4	3	2
0	3	2	5	3	2	3	1	3	4	4	5	3	5	2	1	4	2	3	4	2	3	3	2	3	4															3	4	2	2	5	3	3	1	5	2
0	2	1	4	5	3	3	4	5	1	2	2															3	1	3	4	5	1	1	1	2	1	4	1	1	2	1	1	2	3	5	1	1	3	4	5
0	1	5	4	4	2	3	4	3	4	3	3															3	4	5	5	4	2	3	2	4	1	1	4	2	3	4	4	5	1	3	4	2	5	2	3
0	2	5	4	5	4	4	3	3	4	1	5	3	4	3	3	4	4	4	3	4	3	3	4	2	4															4	4	3	4	3	3	2	4	3	2
0	3	4	3	4	3	4	3	4	4	4	4	3	3	2	3	3	3	3	3	3	2	4	3	1	3	4	4	3	4	4	4	2	4	4	2	4	4	2	4
0	2	1	4	3	4	2	3	2	1	3	1															4	5	1	4	2	3	3	4	2	3	4	2	3	5	3	2	4	4	3	1	2	3	5	4
0	3	4	3	4	3	4	3	3	3	3	4	3	3	3	3	4	4	2	4	3	2	4	4	2	4															3	3	3	3	3	3	2	3	3	2
0	2	4	4	4	4	4	4	4	4	4	4	2	3	2	2	4	3	2	3	3	2	4	4	1	4															4	4	4	4	4	4	2	4	4	2
0	2	4	3	1	3	5	2	1	5	4	1	4	3	5	5	3	2	4	1	2	1	2	3	4	5															3	2	2	4	5	5	4	4	1	3
0	5	4	3	3	3	4	2	3	5	2	5	5	3	4	4	4	4	2	3	4	2	5	5	2	5															4	3	4	3	4	4	2	4	4	2
0	5	5	5	5	4	5	1	4	5	1	5	2	1	1	1	2	1	1	1	1	1	2	3	3	3															1	5	2	4	2	2	2	2	2	2
0	1	1	3	3	1	2	5	3	3	4	5	5	3	3	5	1	1	3	2	1	2	2	1	5	3	1	1	2	1	4	4	1	3	4	3	2	1	4	3
0	3	3	3	3	3	3	3	3	3	3	3															3	3	3	3	3	3	3	3	3	3	3	3	3	3	3	3	3	3	3	3	3	3	3	3
0	4	5	4	4	4	5	2	3	5	3	5															5	5	5	4	5	5	1	4	5	1	5	5	1	5	5	5	4	1	3	5	1	5	5	1
0	4	4	4	4	3	5	4	3	5	4	5	3	3	3	3	3	3	2	3	3	3	4	4	2	4															2	3	2	2	3	3	2	2	3	3
0	4	3	4	4	3	4	3	4	4	2	4	4	4	4	3	3	4	2	3	3	3	4	4	2	4	4	4	3	4	3	4	2	3	4	4	4	4	2	4
0	3	2	2	3	3	2	3	3	3	3	2															3	3	3	3	3	3	3	3	3	2	4	4	3	3	3	3	2	3	2	3	2	3	2	2
0	4	4	4	2	4	4	4	3	4	4	5	4	4	4	4	4	4	2	4	4	2	5	5	1	5															4	4	3	4	4	4	2	4	3	2
0	4	4	3	3	4	4	4	4	4	4	5															4	4	5	5	4	4	2	5	4	2	5	5	1	5	4	4	4	4	4	4	4	4	4	4
0	3	4	2	2	1	4	5	2	4	5	5	2	4	2	2	1	3	4	2	2	2	4	4	1	5	2	4	3	4	1	2	4	1	4	4	4	4	2	4
0	5	5	5	5	5	5	5	5	5	5	5	5	4	5	4	5	5	4	4	4	5	5	5	1	5															5	5	5	5	5	5	5	2	5	5
0	5	5	5	4	5	4	4	4	5	4	4	4	4	5	5	4	4	5	5	5	4	4	5	5	4															5	5	4	5	4	4	5	4	5	4
0	3	2	2	2	2	3	2	2	2	3	2	2	2	2	2	2	3	3	2	2	3	3	3	2	3															2	2	2	3	2	3	2	3	2	3
0	5	4	5	4	4	4	5	5	4	5	5	4	5	5	5	5	4	4	5	5	4	4	5	4	5															4	4	5	5	4	5	4	4	5	5
0	2	3	3	3	3	4	4	3	4	4	4															2	4	3	4	3	4	3	3	4	3	4	4	2	4	3	4	3	4	3	4	4	3	4	4
0	4	2	4	2	3	4	4	4	4	2	5	1	1	1	1	4	1	4	4	1	4	1	1	5	1	4	4	4	4	4	4	2	4	4	2	4	4	2	4
0	5	5	4	3	3	5	3	4	5	4	5	4	3	4	3	4	4	2	4	4	2	4	4	2	4															3	3	4	3	4	4	3	4	4	2
0	5	5	4	5	4	5	4	4	5	4	5	3	4	4	4	3	4	4	4	3	5	3	4	1	4	4	5	4	5	4	5	3	5	3	4	5	5	1	5
0	1	2	4	1	5	3	2	4	2	3	3	3	2	1	2	1	4	4	3	5	2	2	2	3	1	1	3	5	2	3	1	2	4	4	2	3	4	3	2
0	5	2	4	1	2	4	1	5	3	3	2	5	3	5	2	1	4	2	4	3	1	4	3	5	2	1	3	4	2	5	5	4	1	3	2	4	5	3	2
0	5	5	5	5	4	5	4	4	5	4	5	5	5	5	5	5	5	1	5	5	1	5	5	1	5															5	4	5	5	5	5	1	5	5	1
0	3	1	2	3	4	2	4	5	5	4	2	2	5	1	4	2	4	4	5	3	3	5	4	3	2															1	2	5	2	4	4	4	3	3	4
0	4	4	3	4	1	4	5	1	3	5	4	2	3	2	2	2	4	2	2	4	2	4	4	2	4															2	4	2	4	2	2	4	2	2	4
0	4	1	1	5	4	3	1	2	1	4	5															5	1	3	1	4	1	1	1	3	4	4	3	1	5	2	1	4	1	3	1	2	3	4	5
0	4	3	4	3	2	4	3	3	4	2	3	4	3	4	2	4	4	3	3	4	2	3	4	2	3															2	2	2	2	3	2	2	2	3	3
0	4	5	4	2	3	1	4	2	3	5	2	4	2	3	5	4	2	1	5	4	3	2	3	4	5															2	5	1	2	4	4	4	5	3	3
0	1	4	2	2	5	3	4	4	5	3	4															5	4	2	3	4	4	3	2	1	5	3	5	4	2	4	1	2	4	3	2	5	3	5	4
0	4	3	1	4	2	1	5	3	2	5	4	5	2	1	1	4	2	4	5	3	3	3	4	5	2	3	3	1	2	2	4	5	5	5	4	4	3	5	2
0	5	4	1	5	2	2	3	4	3	4	1															2	3	5	2	1	3	4	4	5	4	3	5	2	4	3	2	4	3	5	5	4	4	2	3
0	5	5	5	5	5	5	4	4	5	4	5	3	4	4	4	4	3	4	5	3	5	3	5	3	4	4	5	4	5	5	4	5	5	4	5	5	5	1	5
0	4	4	4	1	2	5	3	3	2	5	2															3	4	1	5	2	4	4	2	3	5	2	4	5	3	4	4	3	3	1	2	5	2	4	5
0	1	1	1	5	4	1	3	5	1	1	1	1	1	1	1	4	1	1	4	1	1	1	1	1	1															3	3	1	3	3	3	1	3	1	1
0	5	4	5	5	4	5	5	5	4	4	4	5	4	5	5	5	5	5	4	4	4	5	4	5	4	5	4	4	5	5	5	5	4	4	5	5	5	4	5
0	5	4	5	4	5	4	5	5	5	4	5	5	4	5	4	4	4	5	4	5	4	5	5	5	5	4	5	4	5	5	4	5	4	5	5	5	5	4	5
0	1	2	4	2	3	2	3	1	4	5	2	5	2	3	2	4	1	4	3	3	1	3	2	4	5	2	2	3	4	3	2	2	3	5	1	3	2	4	3
0	4	4	4	4	3	4	4	3	4	4	4	3	3	3	3	3	3	3	3	3	3	3	3	3	3	4	3	4	4	4	4	4	4	4	4	4	4	2	4
0	4	4	4	4	4	4	3	3	4	4	4	4	3	4	3	4	4	3	3	4	3	4	4	3	4	4	3	4	4	4	4	3	4	4	4	4	4	2	4
0	5	5	5	5	3	5	2	5	5	2	5															4	2	4	1	5	3	1	5	5	1	4	4	1	4	3	3	3	3	3	1	3	5	2	4
0	5	5	5	5	5	5	5	5	5	5	5															5	5	5	5	5	5	5	5	5	5	5	5	5	5	5	5	5	5	5	5	5	5	5	5
0	4	4	3	3	3	5	4	4	4	4	4	4	2	4	3	4	3	2	4	3	3	4	4	1	4															3	3	2	2	3	3	4	3	2	3
0	5	5	5	3	5	5	5	5	5	4	4	5	4	3	3	5	3	4	3	4	4	4	4	2	4	4	4	4	4	4	4	4	4	4	4	4	5	2	4
0	5	5	5	4	5	4	5	4	4	5	4	4	4	5	5	4	5	5	5	5	4	5	5	5	5	5	4	5	5	5	4	5	5	4	4	5	5	5	5
0	3	2	1	4	1	2	5	1	2	5	3															4	2	5	4	4	4	2	3	5	2	4	4	1	5	2	1	1	1	1	1	1	1	1	1
0	4	4	5	5	5	4	4	4	5	4	4															4	4	4	4	5	4	5	5	4	5	5	4	5	4	4	4	5	4	4	5	4	4	4	5
0	3	4	3	5	3	4	4	4	4	4	4															3	5	3	3	3	4	2	4	4	2	5	5	1	5	3	4	2	4	3	4	2	2	3	2
0	5	5	5	2	4	5	5	4	5	5	5	4	3	5	3	5	5	2	5	5	2	5	5	1	5	4	4	1	4	4	4	2	4	4	2	5	5	1	5
0	3	3	3	4	3	4	4	3	3	4	4	2	3	3	3	3	3	3	3	3	3	3	3	3	3	3	4	4	3	3	4	2	2	4	2	4	4	2	4
0	4	3	4	5	4	5	4	4	4	3	5	3	3	3	3	4	3	4	4	3	4	4	3	2	3															4	3	3	3	4	4	2	4	4	2
0	4	5	4	4	3	5	4	4	4	4	5	2	4	3	4	4	2	3	4	3	3	3	3	2	3															3	3	3	4	3	4	5	3	3	4
0	4	4	4	4	4	4	4	4	4	4	4															4	4	4	4	4	4	2	4	4	2	4	4	2	4	4	4	4	4	4	4	2	4	4	2
0	4	4	4	2	2	4	2	2	4	5	2	3	4	3	2	2	4	4	2	4	2	4	4	1	4															4	4	3	4	2	4	1	2	5	2
0	4	4	3	3	4	4	3	4	4	4	4	4	3	4	3	4	4	3	4	4	2	4	4	2	4	5	3	4	3	5	4	3	4	4	3	5	5	2	5
0	5	5	4	4	4	4	2	5	4	2	5	3	4	4	4	4	4	2	4	4	2	4	4	2	4	4	4	4	4	4	4	2	4	4	2	4	4	2	4
0	3	4	4	4	4	4	4	4	4	4	5	3	4	4	4	4	4	2	4	4	2	5	5	1	5															4	5	4	4	4	4	2	4	4	2
0	4	5	5	4	5	5	5	4	5	5	5															5	4	4	4	5	5	1	5	5	1	5	5	1	5	3	4	4	4	5	5	1	4	5	1
0	5	5	5	5	4	5	2	4	5	2	5	4	3	4	2	3	4	2	4	4	4	5	5	1	5	5	4	4	5	3	4	2	4	5	2	5	5	1	5
0	5	5	5	4	4	5	4	4	5	2	5	3	4	3	3	3	3	3	3	3	4	3	4	2	4	4	4	4	4	3	4	2	4	4	2	5	5	1	5
0	4	3	3	3	3	4	3	4	4	3	4	3	3	3	3	3	4	3	4	4	2	4	4	2	4	3	4	4	3	3	4	3	4	3	2	4	5	2	4
0	1	3	1	4	3	2	3	3	2	3	3	1	2	2	1	4	2	1	3	1	2	4	3	2	4															4	4	3	4	4	3	2	3	3	2
0	4	4	4	4	4	5	4	4	4	4	4															4	4	5	3	3	4	1	3	4	2	5	5	2	5	4	4	4	3	4	4	2	4	4	2
0	2	2	3	4	2	3	4	2	4	4	4	2	2	2	2	4	2	3	2	2	2	3	3	2	3	3	2	4	2	2	4	2	2	3	2	4	4	1	4
0	5	5	3	5	4	3	5	4	4	5	5	5	4	3	4	4	4	4	4	4	4	5	5	2	4															4	3	3	5	3	3	3	3	3	5
0	4	3	3	4	4	4	4	4	4	4	5															4	3	4	3	3	4	3	3	4	3	4	4	2	4	2	2	1	2	3	1	3	3	1	2
0	3	3	3	4	4	3	2	4	3	2	4	2	3	3	3	4	3	2	4	3	2	4	4	2	4	3	4	3	2	4	4	2	4	4	2	4	4	2	4
0	4	4	4	2	3	4	4	4	4	4	4	4	3	3	3	3	4	4	3	3	3	4	4	2	4	4	4	4	4	4	4	2	4	4	3	4	4	2	4
0	5	4	5	3	4	5	5	4	5	5	5	4	3	4	3	3	4	5	4	4	4	3	4	3	4															4	4	3	4	3	3	3	3	3	3
0	5	4	4	4	4	5	5	5	4	4	4															4	5	4	4	4	5	4	4	4	4	4	4	5	4	5	4	4	4	4	4	4	4	4	4
0	3	4	3	5	4	4	3	4	4	3	4	3	3	3	3	3	3	3	3	3	2	4	4	2	4	4	4	4	4	4	4	2	4	4	2	5	5	1	5
0	4	5	5	5	4	5	2	4	5	2	5	2	3	2	3	2	2	4	4	2	3	2	3	3	2															3	2	2	4	4	2	2	4	2	2
0	3	4	3	5	5	4	5	5	4	5	4	3	4	2	3	5	3	4	5	3	4	4	4	2	4															2	5	2	5	5	2	5	5	3	5
0	3	5	4	5	3	5	4	4	4	4	5															3	5	4	5	3	4	1	4	4	1	5	5	1	5	3	5	4	5	3	4	2	4	4	2
0	3	2	3	4	2	4	4	2	3	4	3	3	2	4	2	2	3	4	2	3	4	3	3	2	4															3	2	2	3	2	2	2	2	3	4
0	4	2	4	4	4	4	3	4	4	4	5															5	4	5	4	4	5	2	4	5	1	5	5	1	5	4	4	4	3	5	4	2	4	5	2
0	2	2	1	4	2	2	2	2	2	2	2															2	2	2	2	2	3	4	2	2	4	3	2	4	3	2	2	1	2	2	1	4	2	1	4
0	3	2	4	4	3	4	4	3	4	5	4															2	3	3	4	4	3	2	3	4	4	5	5	1	5	1	3	1	4	3	3	3	3	2	2
0	4	5	4	4	4	4	4	4	4	2	5	3	4	2	3	4	4	1	5	4	1	4	5	1	4															3	4	4	4	4	4	2	4	4	4
0	4	4	4	4	4	4	2	4	4	3	4	3	3	2	3	3	2	3	2	2	3	3	2	3	2															2	2	2	2	2	2	2	2	2	3
0	3	4	3	5	1	4	1	2	2	5	5	3	3	5	4	4	2	2	4	2	3	3	2	3	4															2	4	4	5	1	1	2	3	3	5
0	4	5	4	5	3	4	4	3	4	5	5															3	3	4	5	4	4	2	4	4	2	5	5	1	5	4	3	4	4	4	4	2	3	4	2
0	5	5	4	5	5	4	5	4	5	4	5	4	4	5	5	5	4	5	4	5	4	5	5	5	5															5	5	4	4	5	4	5	4	5	5
0	1	1	1	1	1	1	1	1	1	1	4	1	1	1	1	1	1	1	1	1	1	1	1	1	1															1	1	1	1	1	1	1	1	1	1
0	4	4	5	3	4	5	3	5	4	4	5															4	4	3	5	3	4	5	5	4	4	5	4	5	5	4	3	5	5	4	4	5	5	3	4
0	5	5	5	3	5	5	5	5	5	5	5	4	5	4	4	5	4	2	4	5	4	5	4	1	5	5	5	5	5	5	5	1	5	5	1	5	5	1	5
0	5	5	5	5	5	4	4	3	4	4	5	5	5	5	3	4	5	4	4	4	5	5	5	2	5															5	5	5	5	4	4	5	4	4	3
0	4	4	4	3	4	3	3	3	3	3	3															3	3	3	3	3	4	3	3	3	3	4	4	1	4	1	3	1	1	2	1	1	1	1	5
0	4	4	3	2	4	4	2	4	4	2	4	4	4	4	4	4	4	2	4	4	2	4	4	2	4															2	4	4	4	4	4	2	4	4	2
0	4	4	4	4	4	5	3	4	4	3	5	4	4	4	4	4	5	1	4	4	2	4	4	4	4	4	2	5	2	4	5	1	4	4	1	5	5	2	5
0	5	5	5	5	5	5	1	5	5	1	5	4	5	4	5	4	4	1	4	4	1	4	5	1	4															4	5	4	5	4	5	1	4	4	1
0	3	4	3	3	3	4	3	3	3	3	4	3	4	3	4	4	4	4	4	4	3	4	4	3	4	5	5	5	4	3	5	4	3	5	5	5	4	2	4
0	4	4	4	4	4	4	4	4	4	4	4															4	4	4	4	4	4	4	4	4	4	4	4	4	4	4	4	3	4	4	4	4	4	3	4
0	4	5	3	4	4	5	5	4	5	5	5															3	4	3	3	4	4	2	4	4	2	5	5	1	5	3	5	3	5	4	5	2	4	3	2
0	5	4	4	4	5	5	5	5	4	5	4	5	4	4	5	5	4	5	5	4	4	5	4	5	5															5	4	4	5	5	4	5	5	4	4
0	4	4	2	5	4	4	2	4	4	2	5	3	4	4	4	4	3	2	4	3	2	4	4	2	4															4	4	2	4	4	4	2	4	4	2
0	4	4	3	3	4	4	5	3	4	5	5															3	5	3	5	3	5	4	3	5	5	5	4	2	5	3	2	2	3	3	4	3	3	3	2
0	4	5	5	4	5	4	5	4	5	5	5															4	4	4	5	5	5	5	5	5	4	5	5	5	4	4	5	5	4	4	5	5	5	4	5
0	4	5	5	4	5	4	3	2	3	3	3	3	4	3	5	4	4	3	4	5	4	4	4	4	3	4	3	5	3	2	3	4	4	4	3	3	4	4	4
0	3	3	1	4	3	3	5	1	2	2	2	3	2	2	4	1	2	1	5	2	2	4	3	3	5															4	2	3	3	1	4	2	5	4	1
0	5	5	4	4	3	4	5	5	4	5	4	4	4	5	4	5	5	5	5	5	4	5	4	5	5															5	3	5	5	4	5	5	5	4	4
0	1	4	4	3	1	1	4	1	2	3	3															1	3	1	1	3	1	1	3	4	3	4	1	4	1	1	2	3	1	1	5	4	1	1	3
0	4	4	4	4	4	4	5	4	4	5	4	4	4	5	3	5	5	1	5	5	1	4	5	1	4	4	4	4	4	4	4	4	4	4	1	4	4	1	4
0	2	4	3	2	1	2	2	2	5	1	2															1	1	1	1	3	5	1	1	4	2	2	5	4	3	1	5	2	3	3	3	1	3	2	4
0	4	5	5	5	5	5	4	4	5	4	5	4	4	5	5	5	4	5	5	4	4	5	5	5	4	4	4	5	5	4	4	5	5	5	5	5	5	5	4
0	4	5	4	5	4	4	5	4	5	5	5	3	3	2	3	4	2	2	4	2	4	3	4	3	3															2	4	2	2	4	2	4	4	3	4
0	5	4	5	5	5	5	4	4	5	5	5	3	4	4	4	5	4	2	4	4	2	4	4	2	4	5	5	5	5	5	5	2	4	5	2	5	5	2	5
0	4	3	3	5	4	3	4	4	3	3	3															3	4	3	4	4	2	5	4	2	5	3	3	2	3	2	3	2	3	4	2	4	4	2	3
0	4	4	5	5	4	5	5	5	5	5	5															5	5	5	5	5	5	5	5	4	4	5	4	5	5	4	5	5	5	5	5	5	5	4	5
0	1	3	2	1	3	4	5	2	4	5	4	3	5	5	2	4	1	3	4	1	2	5	3	5	3	3	2	1	5	1	3	4	2	4	5	2	3	3	4
0	3	4	4	4	4	3	2	4	5	5	3	4	3	5	3	2	5	4	4	4	4	3	4	4	5	4	3	5	4	3	4	4	3	2	3	4	3	2	4
0	2	4	4	4	4	5	3	3	5	3	3	3	3	3	4	5	4	2	4	5	4	4	5	4	5															4	5	3	4	4	3	3	4	4	3
0	4	4	2	4	2	4	5	3	4	4	3															4	4	3	5	3	4	2	3	5	4	5	4	1	4	2	4	3	3	2	5	3	2	4	4
0	4	3	2	3	1	3	1	2	4	5	3	4	4	2	4	3	5	2	5	2	1	1	3	4	2															5	2	3	5	4	3	1	4	2	1
0	4	5	5	3	4	5	3	4	5	4	5	4	4	4	4	4	4	2	4	5	2	4	4	1	4	4	2	5	4	5	5	2	4	5	2	5	5	1	5
0	3	5	4	5	4	5	5	5	5	4	5	4	4	5	5	5	5	4	4	4	5	5	5	1	5															5	5	5	4	4	4	4	5	5	5
0	5	5	4	3	5	4	3	4	4	2	3															5	4	4	3	4	3	4	3	5	4	5	4	4	3	3	4	4	4	4	4	2	4	4	3
0	3	3	3	4	3	3	3	3	4	3	4	2	3	2	3	2	2	4	3	3	3	3	4	4	3															2	2	2	3	3	3	2	3	2	3
0	3	4	2	4	4	3	3	4	2	2	4															4	3	4	3	4	4	3	3	4	2	4	4	2	4	3	3	2	3	2	2	3	3	2	3
0	4	4	3	5	4	4	2	4	4	3	4	4	3	3	3	4	3	2	4	3	2	4	4	1	4															4	4	3	4	4	3	2	4	3	2
0	5	3	3	4	5	3	1	2	4	2	5															5	5	2	4	2	1	3	4	1	3	3	5	1	4	1	2	3	5	4	3	3	4	2	3
0	3	3	3	3	3	3	3	3	3	4	3															4	3	3	3	2	5	3	3	3	3	3	4	3	3	4	3	3	4	3	3	3	3	3	4
0	5	5	5	4	5	5	2	5	5	1	5	5	4	3	5	5	4	1	5	4	1	5	5	1	5															5	5	3	5	5	5	1	5	3	1
0	2	4	3	4	4	3	5	5	4	5	3	3	4	4	3	4	4	4	5	4	4	3	4	2	3															3	4	4	4	4	4	4	4	4	4
0	4	5	3	4	3	3	4	2	3	4	4	4	4	3	3	5	4	2	4	5	2	5	5	2	5															5	5	3	4	4	4	3	4	3	2
0	1	4	2	5	4	2	3	5	1	3	3	2	5	1	2	4	3	5	4	1	3	4	2	3	3															3	5	1	2	5	1	4	2	4	3
0	1	3	4	4	2	3	4	2	5	3	5	3	2	3	5	5	2	3	1	1	4	3	2	4	5															5	4	3	5	4	2	2	3	5	1
0	4	5	3	4	3	4	2	4	3	2	5	4	2	3	2	4	4	2	4	3	2	4	4	2	4	4	3	4	3	4	4	2	4	4	2	5	4	2	5
0	3	2	3	3	4	3	3	3	4	2	3	4	2	2	3	4	3	3	3	3	3	3	3	3	3															2	4	2	3	3	4	3	3	2	3
0	3	4	3	3	2	2	3	2	3	4	5															3	4	4	4	4	3	2	4	4	2	4	4	2	4	2	4	3	4	3	2	4	3	2	4
0	2	4	1	1	1	4	4	1	1	5	4	1	4	1	1	3	2	5	1	1	3	3	2	4	4	4	4	3	4	5	4	1	1	1	1	1	4	1	1
0	5	4	5	5	4	4	5	4	4	5	4															4	5	5	5	4	5	5	4	4	5	5	5	4	5	5	5	4	5	5	5	4	5	4	4
0	5	5	4	4	4	5	4	5	5	4	5	4	4	2	4	3	3	2	3	3	4	3	4	2	2															2	4	3	5	3	2	4	3	3	4
0	5	5	5	5	4	5	1	5	5	1	5	5	5	5	5	5	4	4	4	4	4	1	4	3	2	5	4	5	5	5	5	4	5	4	4	5	5	5	5
0	3	5	3	4	3	4	4	4	4	5	5	4	4	2	2	2	4	2	4	4	2	5	5	2	5															3	2	3	2	3	4	2	4	3	2
0	1	5	3	5	4	2	2	4	3	4	2															5	4	4	4	3	5	3	2	1	2	4	3	2	5	2	2	4	3	5	4	5	4	3	1
0	4	5	4	5	5	5	5	4	4	4	5															5	5	5	4	5	4	5	4	5	5	5	5	5	4	5	4	4	5	5	4	4	5	4	5
0	5	4	4	3	4	4	4	4	5	4	5															5	3	5	3	4	5	3	4	5	2	5	5	1	5	4	3	4	3	5	5	3	5	3	3
0	4	2	3	2	5	3	4	1	5	1	5															3	2	2	5	4	5	1	1	3	4	3	2	4	3	5	1	3	2	2	2	5	4	1	4
0	4	5	5	4	5	5	4	5	5	4	5															5	5	4	5	5	5	5	4	4	4	5	5	4	5	4	5	4	4	5	4	5	4	5	5
0	4	4	4	4	4	5	4	4	5	4	5	3	3	4	3	4	4	2	2	4	4	4	4	1	4															3	3	4	4	3	4	4	3	4	4
0	4	4	4	4	4	4	4	4	4	4	4															4	4	4	4	4	4	2	4	4	2	5	4	1	4	4	4	4	4	4	4	2	4	4	2
0	5	5	4	3	5	5	1	5	5	1	5	5	2	5	2	5	5	5	5	5	5	5	5	2	5															5	5	5	5	5	5	5	5	5	5
0	5	5	4	3	3	5	2	3	5	5	5	4	2	2	4	3	4	3	4	2	4	5	5	2	5	5	4	5	4	4	5	2	2	5	2	5	5	1	5
0	4	4	3	3	4	4	5	4	4	5	4	4	4	4	3	3	3	4	4	3	4	3	4	2	4															4	5	5	5	2	4	1	2	4	2
0	3	3	2	3	3	3	4	3	3	4	3															3	3	3	3	3	4	4	3	3	2	4	4	2	4	2	3	2	3	2	2	4	3	3	3
0	4	1	4	2	4	1	1	1	1	4	1	1	2	4	4	2	1	1	5	1	3	1	1	4	1															1	5	4	3	3	1	3	1	1	1
0	3	3	3	3	3	3	3	3	3	3	3	3	3	3	3	3	3	3	3	3	3	3	3	3	3	3	3	3	3	3	3	3	3	3	3	3	3	3	3
0	4	3	3	4	5	5	5	5	5	4	3	2	5	5	3	3	3	4	4	1	2	3	5	4	2															5	5	5	5	5	5	5	5	5	5
0	4	3	3	5	4	4	4	4	4	3	3	5	4	3	5	3	4	5	4	4	3	4	4	5	4	3	4	4	3	4	5	3	4	4	4	4	4	5	4
0	4	4	3	4	4	4	3	4	4	3	5	4	4	3	5	4	4	4	4	3	2	3	4	2	2	4	4	4	4	4	5	2	4	4	4	5	5	2	5
0	4	5	3	5	4	5	4	5	4	4	5	3	4	3	4	4	4	2	4	3	3	5	4	1	4															4	5	4	5	4	4	2	4	4	2
0	4	5	3	5	3	4	4	3	4	4	5	3	4	3	4	3	3	3	4	3	3	3	3	2	3															3	3	3	3	3	3	4	3	3	3
0	3	1	4	4	5	1	3	3	1	2	2															1	4	3	5	5	3	3	1	4	2	2	3	4	5	5	4	4	5	1	1	3	3	2	4
0	2	3	2	5	2	2	2	2	2	2	2	2	2	2	2	2	2	2	2	2	2	2	1	3	2	3	3	2	3	2	3	3	3	3	4	4	3	2	3
0	3	5	2	2	3	3	4	3	3	4	3															5	5	4	5	4	5	5	5	5	5	5	5	1	5	4	3	3	4	3	4	4	3	4	4
0	2	2	5	4	3	4	3	5	1	3	4	4	3	3	5	2	1	4	5	4	2	3	4	2	5															2	5	4	5	2	4	1	3	3	3
0	4	4	3	4	4	4	4	4	4	4	4	4	4	4	4	4	4	4	4	4	4	4	4	1	4	5	5	5	2	5	5	2	5	5	2	5	5	1	5
0	4	4	3	3	4	4	5	4	3	5	3	3	3	3	3	4	3	2	3	3	2	3	4	2	4	4	4	3	4	4	4	2	4	3	2	4	4	2	4
0	4	5	3	4	3	5	4	3	4	4	5															5	4	5	4	2	5	1	3	5	1	5	5	1	5	4	4	3	4	3	4	2	3	4	3
0	5	5	5	5	5	5	5	5	5	5	5	5	5	5	5	5	5	5	5	5	5	5	5	5	5	5	5	5	5	5	5	5	5	5	5	5	5	5	5
0	3	3	3	3	3	3	2	2	3	3	3	3	2	3	3	3	3	3	3	2	3	4	4	2	4															3	3	3	3	3	3	3	3	3	3
0	2	5	4	4	4	4	5	5	5	5	4	3	2	3	2	5	4	1	5	3	1	4	5	2	4	5	4	3	3	4	4	2	4	4	2	3	4	2	3
0	4	5	5	5	5	5	4	5	5	4	5															4	5	5	4	5	5	2	5	5	2	5	5	1	5	4	5	5	5	5	5	2	5	5	2
0	3	4	3	4	3	4	4	4	4	4	4	4	2	2	3	3	3	2	4	4	4	4	3	2	3	4	4	3	4	3	4	2	4	4	3	4	4	2	4
0	4	4	5	3	5	5	5	5	5	4	5	4	3	4	3	5	4	4	5	4	4	4	4	1	4															4	4	3	3	4	3	2	4	3	2
0	4	4	4	4	3	4	4	4	4	4	4	3	3	4	3	3	4	1	4	4	1	4	5	1	4	3	5	5	4	3	5	1	3	5	1	1	5	1	5
0	1	5	1	5	2	4	5	2	4	5	5															1	4	1	4	1	1	5	1	1	1	4	4	3	3	1	5	1	5	1	1	5	1	4	5
0	5	5	4	1	4	5	5	5	5	5	5	5	3	4	1	5	4	4	5	5	5	3	3	1	4	5	1	5	5	5	5	1	5	5	1	5	5	1	5
0	4	4	3	3	4	4	4	3	4	4	4	4	3	4	4	5	4	4	4	4	3	5	5	2	5	5	3	4	4	4	4	3	4	4	3	4	5	2	4
0	4	2	3	4	3	5	4	4	4	3	4	5	4	4	4	3	5	2	4	5	2	5	5	1	5	5	1	4	2	3	4	1	3	5	2	5	5	2	5
0	4	3	3	3	3	4	4	3	3	4	4	3	3	3	3	3	3	4	2	3	3	3	4	1	4															4	3	4	3	3	4	3	3	4	3
0	4	5	4	5	4	5	2	4	5	2	5	5	4	5	5	5	5	2	4	5	1	5	5	1	5															5	4	4	2	4	5	1	4	5	1
0	4	5	3	3	2	5	4	3	5	4	5	5	5	5	2	2	5	2	4	5	2	5	5	2	5	2	5	2	5	4	5	3	2	4	5	5	5	1	5
0	3	3	3	4	3	3	4	3	3	3	4	3	4	3	3	3	3	2	3	3	2	2	2	4	2															3	3	3	3	3	3	3	3	3	3
0	2	2	2	2	4	2	4	2	2	4	2															3	2	3	2	2	4	2	2	4	2	4	4	2	4	4	2	2	2	2	3	2	2	2	2
0	5	4	3	2	2	3	4	1	2	3	2															2	3	4	1	5	2	3	4	4	3	1	3	4	2	3	4	5	2	1	2	2	3	4	4
0	3	4	3	4	3	4	4	3	4	4	4															3	4	3	4	4	4	4	3	3	3	4	4	2	4	4	3	3	3	3	3	3	3	3	3
0	4	5	5	2	4	5	5	4	5	4	5	4	4	4	3	4	5	2	4	5	2	5	5	1	5															5	4	4	4	5	5	2	5	5	2
0	4	5	4	3	4	5	4	4	4	4	5															4	5	4	4	4	4	3	4	4	2	4	4	2	5	4	5	4	5	4	4	2	4	5	2
0	1	1	1	1	1	1	1	1	1	1	1															1	1	1	1	1	1	1	1	1	1	1	1	1	1	1	1	1	1	1	1	1	1	1	1
0	4	4	3	2	3	4	5	3	3	5	4	4	3	3	3	3	4	4	3	3	3	4	4	2	4															4	3	4	3	3	4	3	3	3	4
0	3	3	3	4	3	4	2	4	4	2	4															4	2	3	2	3	3	2	4	2	2	4	4	2	4	4	3	3	3	3	3	2	4	2	2
0	4	4	4	2	3	4	3	3	4	4	4	3	4	3	4	3	3	3	4	3	3	4	4	2	4															4	4	3	2	4	3	3	4	3	3
0	4	4	2	5	4	4	4	4	4	4	4	2	3	2	3	2	2	2	2	2	2	2	2	4	2															4	3	2	4	2	2	3	2	4	3
0	4	4	4	4	4	5	2	4	4	4	5	4	4	4	4	4	4	2	4	4	1	5	5	1	5															4	4	4	4	4	4	2	4	4	2
0	5	5	5	4	5	5	4	5	5	3	5	5	1	4	1	5	4	2	5	4	2	5	5	1	5															1	1	5	1	1	1	1	5	5	1
0	3	4	4	2	3	3	1	3	4	2	4	4	2	4	2	3	4	2	2	4	2	4	5	1	4															4	4	4	4	2	4	2	2	4	1
0	4	4	4	4	4	5	4	4	4	4	3	4	4	4	4	3	4	3	4	4	2	4	5	2	4															4	4	4	4	4	4	2	4	4	2
0	5	4	5	3	3	5	4	3	5	4	5	3	4	4	2	5	4	3	4	4	4	4	4	5	4															5	3	5	3	5	4	2	4	5	1
0	2	1	5	2	4	5	1	2	5	1	5															5	1	5	5	5	5	1	3	5	5	5	5	1	5	5	5	1	5	5	5	1	3	5	1
0	3	3	3	2	3	3	3	3	4	2	3															2	3	3	3	2	4	2	3	3	3	3	3	2	3	3	4	3	3	3	3	3	2	3	3
0	5	5	5	4	5	4	4	4	4	5	5															5	4	4	5	5	5	5	5	5	5	2	5	5	5	5	4	5	5	5	5	5	5	5	2
0	4	4	4	5	5	5	4	4	5	4	5															5	5	5	5	5	5	2	5	5	2	5	5	1	5	3	3	3	3	4	5	3	5	3	2
0	3	5	5	4	4	5	5	4	5	5	5	5	5	5	5	5	5	3	4	5	2	5	5	5	5															4	5	4	5	4	5	2	4	5	2
0	5	5	5	5	4	5	4	4	4	5	5	5	4	4	4	5	4	5	5	5	4	5	5	5	5	4	4	5	4	5	5	5	5	5	4	5	5	5	5
0	3	4	4	4	4	4	4	4	4	4	5	4	3	3	3	4	4	2	4	4	2	5	5	2	5	3	4	3	3	4	4	3	4	4	2	3	4	2	4
0	3	3	3	4	3	3	3	3	3	3	4															4	4	4	4	3	4	2	3	4	2	5	5	2	5	3	3	3	3	3	3	3	3	3	3
0	5	5	5	5	5	5	4	5	5	4	5	5	5	5	5	5	5	2	5	5	3	5	5	1	5	3	5	5	5	5	5	3	5	5	3	5	5	1	5
0	4	5	4	5	5	5	4	4	4	5	4															5	4	4	5	5	5	5	4	5	5	5	4	5	5	5	5	4	4	4	5	5	4	5	5
0	5	5	5	4	5	5	5	5	5	4	5	3	3	3	2	4	4	2	3	3	2	4	4	2	4															4	4	4	3	4	4	2	4	5	5
0	4	5	4	3	4	4	3	4	4	4	4															3	4	3	4	4	4	4	4	4	4	4	4	2	4	5	2	5	2	5	5	2	5	5	2
0	5	5	4	3	4	5	4	5	5	4	4	5	5	4	3	5	5	5	5	5	1	5	5	1	5															4	3	3	4	4	5	2	4	4	3
0	3	2	3	3	3	3	3	3	3	3	4															4	4	4	4	4	4	4	4	4	4	4	4	2	4	3	3	3	4	3	3	3	3	3	3
0	3	5	3	3	3	3	4	4	4	4	3	3	2	4	3	3	4	4	3	4	2	2	3	3	4	5	3	3	5	5	2	2	3	4	4	4	4	3	5
0	3	5	2	4	3	4	4	3	4	4	4	2	2	2	2	2	3	2	3	4	2	4	4	1	4	4	3	3	3	2	4	2	2	4	2	4	4	2	4
0	5	5	4	4	5	5	3	4	5	3	5	5	4	5	4	5	5	3	5	5	1	5	5	1	5															5	4	5	4	5	5	3	4	5	2
0	4	2	5	4	3	4	4	3	5	3	4															3	4	4	3	3	4	3	4	2	5	4	3	3	4	4	5	4	4	4	3	2	5	3	3
0	4	4	4	4	4	5	5	5	5	4	4	5	4	5	4	4	4	4	5	4	4	5	4	5	4	4	5	5	5	4	4	5	5	4	5	4	4	5	5
0	5	4	4	5	5	4	4	5	4	5	4	4	5	3	4	5	5	5	5	5	5	4	5	5	5	5	4	4	4	5	4	5	5	5	5	5	4	5	5
0	3	3	3	4	3	4	4	3	4	3	4	4	4	4	4	4	4	3	4	3	3	4	4	4	4															4	4	4	4	4	4	3	4	4	4
0	4	3	3	3	3	3	4	2	3	4	3	3	3	3	4	4	4	3	4	4	4	2	4	4	2	4	4	4	4	3	2	4	3	2	4	3	3	3	4
0	2	4	5	2	5	1	5	3	2	2	2															5	5	1	2	3	1	1	5	3	5	5	2	3	4	4	5	4	5	2	5	3	5	3	4
0	4	4	3	3	3	4	3	3	4	3	4															4	5	4	5	3	4	4	3	4	2	4	4	2	4	3	5	3	5	3	3	3	3	3	3
0	5	4	4	3	5	4	5	4	4	5	5															5	5	5	5	5	5	2	5	5	2	5	5	1	5	4	5	4	4	4	4	4	5	4	4
0	5	5	5	5	3	5	5	5	5	5	5	5	3	5	4	5	5	4	5	5	5	5	5	1	5															5	3	3	4	5	5	2	5	5	1
0	4	4	3	3	3	4	4	4	4	4	4	3	3	4	3	4	4	3	4	3	3	4	4	3	4	4	4	3	4	4	4	3	4	4	3	4	4	2	4
0	5	4	4	3	4	2	2	5	1	3	3	5	4	4	1	3	5	2	2	3	4	5	4	3	2															1	5	4	4	4	5	2	2	3	3
0	3	4	2	4	3	3	4	4	2	4	3															3	3	1	2	3	4	2	3	2	2	5	5	1	5	2	2	2	2	3	2	2	3	2	2
0	4	4	2	3	3	3	2	3	3	2	5	3	3	3	3	3	4	2	3	3	2	4	4	2	4															3	3	2	2	3	3	3	3	2	3
0	3	3	3	3	3	3	3	3	3	3	3	3	3	3	3	3	3	3	3	3	3	3	3	3	3	3	3	3	3	3	3	3	3	3	3	3	3	3	3
0	4	5	5	4	4	5	5	4	5	4	4															5	5	5	5	3	5	1	5	5	1	5	5	1	5	5	5	5	5	4	5	1	4	5	1
0	4	5	4	4	4	4	2	4	4	2	4															4	4	4	4	4	4	2	4	4	2	4	4	2	4	4	4	4	4	4	4	1	4	4	1
0	4	4	4	4	4	4	4	3	4	3	4	5	4	5	4	4	4	5	4	4	2	4	4	2	4	4	5	4	2	4	4	2	4	4	2	5	4	2	4
0	4	4	4	3	3	4	2	3	4	3	4															4	4	4	4	3	4	2	3	4	2	4	4	2	4	4	4	4	2	3	4	2	3	4	2
0	3	3	3	4	3	3	3	4	4	3	3															3	3	3	4	3	3	3	4	4	3	3	3	4	4	4	3	3	4	3	3	4	5	3	3
0	4	4	4	4	4	4	4	4	4	4	4	4	3	4	2	4	4	4	4	4	4	4	4	2	4	5	3	5	3	5	5	1	5	4	5	5	5	1	5
0	4	5	4	4	4	5	5	4	5	5	5	2	2	2	2	3	2	2	3	2	2	4	5	1	4	2	2	4	2	2	2	2	2	2	2	4	4	2	4
0	5	4	5	5	5	5	5	5	5	5	5	4	4	5	4	4	5	2	4	4	2	5	4	2	5	4	5	2	4	4	4	2	4	4	2	5	5	2	5
0	3	3	3	3	4	3	4	4	3	4	4	2	2	2	2	4	2	4	3	2	4	2	2	4	2	4	4	4	4	4	4	2	4	4	2	4	4	2	4
0	5	5	5	4	5	5	4	3	5	4	5	4	4	5	4	4	4	5	5	5	5	5	5	5	4															4	4	4	5	5	4	5	5	5	5
0	2	5	4	4	3	5	2	4	4	2	5															4	4	4	4	4	4	2	4	4	2	5	5	1	5	4	4	4	4	4	4	2	4	4	2
0	5	5	5	1	5	5	2	5	5	4	5	4	3	4	5	4	4	2	5	4	2	5	5	1	5															5	5	5	4	5	5	1	5	5	1
0	2	2	4	5	3	4	3	2	4	3	3	3	4	3	5	5	4	2	4	5	3	1	3	3	5															3	4	4	2	4	5	2	2	3	5
0	4	5	5	4	3	5	4	3	5	4	5	4	4	4	4	4	5	3	4	5	2	5	4	1	5															3	4	5	5	3	5	1	4	5	1
0	5	5	5	4	5	5	4	4	5	4	5	5	4	5	4	5	5	2	5	5	2	5	5	1	5															5	5	5	5	4	5	1	4	4	2
0	4	4	5	5	4	4	5	5	5	4	4	5	3	5	4	4	4	2	4	4	5	4	5	5	5	5	4	3	5	4	3	4	5	4	4	5	4	4	4
0	5	4	4	3	3	4	5	3	3	4	3	5	4	4	4	4	5	4	5	4	5	4	5	4	4	4	3	4	4	3	3	4	4	4	3	4	4	3	3
0	5	5	5	5	5	5	3	3	5	2	5	5	5	5	5	5	5	2	5	5	2	5	5	1	5	5	1	5	1	5	5	1	5	5	1	5	5	1	5
0	4	4	4	2	4	5	4	4	5	4	5	3	3	4	3	4	4	2	4	4	2	4	4	1	4															3	4	4	4	4	4	2	4	4	2
0	4	3	2	4	4	3	5	2	1	5	3	4	3	1	2	5	5	3	4	2	4	4	5	2	3	5	5	1	4	2	2	4	3	3	4	2	3	5	4
0	5	4	4	4	4	5	3	4	4	2	4	4	4	4	4	3	4	5	5	4	5	4	5	2	5	2	3	3	2	3	3	3	2	4	4	2	3	3	4
0	3	4	3	4	3	4	3	4	4	4	4															3	4	3	5	4	4	3	3	5	2	5	5	2	4	3	4	2	4	3	3	3	3	3	2
0	3	5	3	3	3	5	5	3	5	5	5															3	3	2	3	3	4	5	3	3	4	4	4	1	4	3	3	3	3	3	3	4	3	3	3
0	5	4	4	3	3	4	4	3	5	4	5	4	4	5	3	3	5	2	3	5	2	5	5	1	5	4	3	5	3	3	5	4	3	5	5	5	5	1	5
0	3	2	2	4	5	3	4	5	4	1	2															3	4	4	5	2	3	3	4	4	2	2	3	5	1	3	5	2	5	2	4	3	3	3	1
0	5	5	5	5	4	5	5	4	5	5	5	2	2	3	2	3	4	4	3	4	4	4	4	4	4	4	4	4	4	4	4	4	4	4	2	4	4	2	4
0	5	5	5	3	5	5	3	4	5	2	5															4	4	4	3	4	5	2	4	5	1	4	5	2	5	4	4	4	3	4	4	1	4	4	2
0	4	4	4	3	4	4	3	4	4	4	4	4	3	3	3	4	4	2	4	4	3	4	4	2	4	4	4	3	3	4	4	3	4	4	2	4	4	2	4
0	5	5	5	5	5	5	5	5	5	5	5															5	5	5	5	5	5	3	5	5	3	5	5	1	5	5	5	5	5	5	5	1	5	5	1
0	1	4	2	2	3	2	5	3	4	3	5	3	4	3	1	3	4	4	5	2	2	4	5	2	3															1	2	5	2	3	3	5	3	4	4
0	1	4	2	2	5	3	4	4	3	1	3	5	2	4	3	2	5	3	4	4	1	3	5	1	3	3	5	3	1	2	5	2	4	2	4	5	4	2	3
0	3	2	1	1	4	4	2	5	4	3	5															1	5	4	3	5	4	1	3	3	2	4	3	4	2	3	4	3	5	2	3	1	3	5	4
0	4	4	4	4	4	4	4	4	4	4	4															4	4	4	4	4	4	4	4	4	4	4	4	4	4	4	4	4	4	4	4	4	4	4	4
0	2	5	3	3	4	5	4	4	3	2	4	4	5	3	3	2	2	3	1	4	5	2	5	3	3															3	2	3	4	2	4	5	3	5	4
0	4	5	4	4	4	5	4	4	4	4	4	4	5	4	4	4	4	4	4	4	4	4	4	4	4	4	4	4	4	4	4	4	4	4	4	4	4	4	4
0	5	5	4	5	5	5	3	5	5	5	5	4	5	5	5	5	5	2	5	5	1	5	5	1	5															5	5	4	5	5	5	1	5	5	1
0	4	4	4	4	4	4	4	4	4	3	4															3	4	5	5	4	5	3	4	5	5	5	5	1	5	3	5	3	5	4	4	3	4	4	3
0	4	5	4	5	3	3	4	4	4	5	5	5	4	4	4	5	3	3	4	5	4	5	3	4	4															3	4	4	4	3	4	5	5	4	3
0	4	5	3	4	4	3	3	4	3	3	3															4	3	4	4	3	5	3	4	3	4	4	3	5	3	4	4	4	5	5	4	5	5	4	5
0	4	4	4	4	4	4	4	4	4	4	4	4	4	4	2	4	4	2	4	4	2	4	4	4	4															4	4	4	4	4	4	3	4	2	2
0	3	4	4	4	4	4	4	4	4	4	4	3	4	3	4	4	4	4	4	4	3	3	4	2	3															3	4	3	4	4	4	2	4	4	2
0	4	4	3	4	3	4	5	4	4	5	4	3	4	3	3	4	4	2	4	4	2	4	4	2	4	4	3	4	4	4	4	4	4	4	4	4	4	2	4
0	4	4	4	4	4	4	4	4	4	4	3															4	2	4	2	4	4	2	4	4	2	4	4	4	4	4	4	2	4	4	2	4	4	2	2
0	4	4	4	2	4	4	5	4	4	4	4	4	4	4	4	3	4	4	4	3	3	4	4	2	4	4	4	4	4	3	4	4	3	5	2	4	4	2	4
0	4	4	4	4	3	4	5	4	4	5	3															2	5	3	5	3	4	5	3	4	5	4	4	2	4	4	4	3	4	3	4	2	3	4	4
0	4	4	3	5	4	4	5	4	4	5	4															3	4	4	5	4	4	4	4	3	4	5	5	1	5	3	4	3	4	4	4	2	4	4	1
0	2	1	2	5	3	1	5	2	3	5	2	2	2	2	2	3	3	4	3	2	2	4	3	2	3															2	4	2	2	2	3	3	2	3	3
0	5	4	4	4	5	5	4	4	5	5	5	4	4	5	5	4	5	5	4	5	5	5	5	4	4															5	4	5	5	5	5	4	5	5	4
0	4	3	4	4	4	4	3	4	4	4	4															4	2	4	4	4	4	2	4	4	2	5	5	1	5	4	1	4	1	4	4	3	4	4	3
0	4	5	4	5	4	4	4	4	4	4	5															4	4	4	2	4	5	3	3	4	2	4	4	2	4	4	4	4	4	4	4	2	4	4	2
0	4	4	3	4	4	4	4	4	4	4	4															4	4	5	4	4	5	2	5	5	2	5	5	1	5	4	4	4	4	4	4	2	4	4	2
0	4	3	3	4	3	3	4	3	3	4	4	4	4	4	4	3	4	4	4	4	4	3	3	2	4															4	4	4	4	3	4	3	3	3	4
0	3	3	3	3	4	4	4	3	4	3	4	3	3	4	3	3	3	3	4	3	3	3	3	3	3	4	3	3	4	4	4	2	4	4	2	5	5	1	5
0	3	4	4	4	4	5	4	4	3	5	5	4	4	4	5	5	5	4	4	4	4	4	4	2	5															3	5	4	3	3	4	4	4	3	5
0	4	5	5	5	5	5	5	5	5	3	5	5	5	5	5	5	5	3	5	5	2	5	5	1	5	5	2	5	3	5	5	2	5	5	3	5	5	1	5
0	3	3	3	3	2	3	3	3	3	3	3															3	3	3	3	3	3	3	3	3	3	3	3	3	3	3	3	4	3	4	3	2	2	3	3
0	4	4	4	5	4	4	4	3	3	3	4	4	4	4	4	4	4	5	3	3	5	4	4	2	5	1	2	2	3	2	2	3	3	2	2	4	4	2	4
0	1	3	4	1	3	1	1	1	1	1	4	1	1	1	1	4	3	1	1	4	1	4	4	1	1															5	4	1	4	1	4	1	3	1	1
0	5	5	5	4	5	5	4	5	5	2	5	5	3	5	3	4	4	2	5	5	1	5	5	1	5	5	4	5	2	4	4	2	4	5	2	5	5	1	5
0	3	5	5	4	2	4	3	4	3	2	4															4	3	4	4	3	5	3	4	3	4	4	4	4	3	3	4	5	4	4	2	3	3	4	4
0	5	5	5	5	5	4	4	5	5	5	5															5	5	5	4	5	4	5	4	5	4	4	5	5	5	4	5	5	5	4	5	5	4	5	4
0	4	5	5	5	4	5	2	4	5	2	5	4	4	4	4	4	4	4	4	4	2	4	5	1	4															4	5	4	5	5	4	2	3	4	2
0	4	4	4	3	3	4	2	3	4	2	5															4	3	4	4	4	4	3	3	4	2	4	4	4	4	3	4	3	3	3	4	2	3	4	3
0	3	3	5	4	5	4	3	4	4	4	3															5	4	4	2	4	3	4	5	4	4	4	4	5	4	3	5	3	4	4	4	4	4	4	3
0	5	5	5	5	3	3	4	5	4	5	5	4	3	4	5	5	5	5	4	4	5	5	5	5	5	5	5	4	5	4	5	4	4	5	5	5	5	5	4
0	3	4	2	4	3	4	4	3	4	4	4	2	3	2	3	2	3	3	2	3	2	4	4	2	4	3	3	4	3	3	4	2	2	4	2	5	5	1	5
0	5	5	4	5	4	5	4	5	5	4	5	5	5	5	5	5	4	4	4	5	4	5	5	5	5															5	4	5	5	5	5	4	4	4	5
0	4	4	4	4	4	4	4	4	4	4	4	3	4	4	4	4	4	2	4	4	2	4	4	2	4	3	4	4	4	3	4	2	4	4	2	4	4	2	4
0	4	4	3	4	3	4	4	3	4	4	4	2	2	2	3	3	3	3	3	2	3	3	3	2	3	2	3	3	4	3	3	4	4	3	4	4	4	2	4
0	4	5	3	4	4	5	4	3	4	4	4	4	3	3	4	3	3	3	3	3	3	3	3	2	3															4	3	3	2	3	3	3	3	3	4
0	3	3	3	3	4	3	5	4	3	4	4															3	4	4	4	4	4	2	3	4	1	4	4	1	4	4	4	3	4	4	4	2	4	4	2
0	2	4	4	3	2	4	4	3	3	4	5	3	4	4	3	2	4	4	2	4	4	4	4	2	4	3	3	4	2	4	4	4	4	4	4	4	4	2	4
0	5	4	4	4	3	5	4	3	5	4	4	4	4	3	4	3	4	3	3	4	3	3	4	1	2															4	5	4	4	3	4	2	3	4	2
0	1	3	4	2	5	1	5	4	2	3	3															4	5	4	1	3	2	2	5	5	3	5	5	5	5	5	2	3	5	1	2	5	3	4	4
0	3	3	2	3	3	4	2	4	3	4	3	3	3	3	3	3	3	3	2	4	4	3	3	3	3															2	3	4	3	3	3	4	2	3	3
0	3	5	4	4	4	5	4	3	5	4	5	4	3	5	5	5	5	2	5	5	1	5	5	1	5															5	2	4	2	4	4	2	5	5	2
0	3	5	3	5	3	5	3	3	4	2	5															5	3	4	3	3	5	2	3	5	2	5	5	2	5	3	5	4	4	2	4	3	3	4	3
0	5	5	5	5	5	5	4	5	5	2	5	4	5	5	3	5	4	2	4	4	4	3	3	1	2															4	4	4	2	4	5	2	4	4	1
0	4	5	5	4	4	5	2	4	5	1	5	4	4	4	4	4	5	2	4	4	2	4	4	2	4	5	4	5	2	4	4	2	4	5	2	5	4	2	5
0	5	5	5	5	5	5	3	5	4	3	5															5	2	5	1	5	5	1	5	5	1	5	5	1	5	5	5	5	2	5	4	1	5	4	1
0	3	3	2	3	4	2	4	3	2	4	4															3	3	4	3	4	4	3	4	4	2	4	4	2	4	3	4	2	3	3	3	2	4	2	2
0	4	5	4	5	4	5	4	4	4	4	5	3	4	3	4	3	3	3	4	3	4	4	4	3	4	5	4	3	4	3	4	4	4	3	4	5	5	1	5
0	4	4	3	4	3	4	4	4	4	4	4	4	3	3	3	3	4	4	4	3	4	4	4	2	4															4	3	4	3	3	4	3	3	4	3
0	4	5	4	4	4	4	4	4	4	5	4															4	4	4	4	4	4	3	4	3	2	4	4	3	4	4	4	4	3	4	4	4	4	4	2
0	5	1	5	1	5	5	5	5	5	1	5	5	5	5	5	5	5	5	5	5	5	5	5	3	5	5	5	5	5	5	5	1	3	5	1	5	5	1	5
0	4	5	4	4	3	4	4	4	5	3	5															4	3	4	4	4	3	4	4	3	4	4	4	2	4	4	3	4	3	3	4	2	3	3	2
0	1	1	3	1	1	1	4	5	4	4	5															4	4	1	1	5	1	3	1	1	1	1	4	4	1	1	1	1	1	4	4	2	4	4	1
0	4	5	4	4	5	4	4	5	4	5	4	4	4	5	4	5	4	5	4	5	4	4	5	2	4	4	3	3	2	3	4	3	3	3	3	3	4	4	5
0	2	2	5	4	3	4	1	3	3	2	3	2	3	2	4	4	3	4	3	5	2	4	5	4	2															1	4	3	4	2	2	5	2	3	3
0	4	5	3	4	3	4	3	4	4	3	5															3	4	4	3	3	4	3	3	4	2	4	4	2	4	3	3	3	3	3	3	3	3	3	3
0	5	5	5	4	5	5	1	4	5	5	5															5	4	5	5	5	5	1	5	5	1	5	5	1	5	5	4	5	5	5	5	1	5	5	1
0	5	5	4	3	4	5	4	4	5	4	5															5	5	5	5	5	5	2	5	5	2	5	5	1	5	5	5	5	5	4	5	2	4	5	2
0	2	4	3	3	3	3	3	3	4	2	3	3	3	3	3	2	3	4	2	3	3	3	3	3	3															3	2	3	2	4	3	3	3	4	3
0	4	3	4	4	2	4	2	3	3	3	4	4	3	2	5	2	4	4	3	4	3	3	4	4	2															3	2	2	3	3	4	2	3	2	4
0	4	4	4	4	4	4	4	4	4	4	4	3	3	3	3	3	3	4	3	3	4	3	3	2	3	4	4	3	4	3	4	4	3	4	4	4	4	2	4
0	1	1	1	3	1	1	4	1	1	1	1															2	3	4	2	2	3	2	2	3	2	2	2	5	3	3	3	3	3	3	3	3	2	2	3
0	1	3	4	4	2	2	5	1	5	3	3															5	1	3	2	1	3	2	4	5	4	3	4	3	2	2	5	4	3	1	1	4	3	5	2
0	4	3	4	3	3	3	4	3	3	4	3															2	4	4	5	3	3	4	5	4	4	3	3	4	5	4	4	3	4	4	4	3	3	3	3
0	4	4	4	3	4	4	3	4	3	5	4	4	4	3	4	4	3	5	5	4	4	3	4	3	4															3	4	4	4	4	4	3	3	3	4
0	4	4	4	3	3	4	4	3	3	4	4															3	5	4	4	4	3	4	4	4	4	4	5	4	3	3	4	5	4	4	4	4	3	4	3
0	4	2	4	4	5	4	4	3	4	4	3	4	2	4	3	3	3	5	3	4	4	5	4	3	4															4	4	3	4	5	4	4	4	4	4
0	3	3	1	4	4	1	5	5	2	3	2	3	4	3	1	4	3	5	5	2	1	4	1	2	1	1	5	3	2	1	4	5	2	4	5	3	1	4	2
0	5	5	5	5	4	5	5	5	5	5	5	4	5	4	5	5	5	4	4	5	4	4	5	5	5	3	5	5	5	5	4	5	4	5	5	5	4	4	5
0	5	5	5	2	5	5	4	5	5	2	5	4	3	3	2	4	4	2	5	4	2	4	4	2	4	5	4	5	5	5	5	1	5	5	1	5	5	1	5
0	4	4	5	5	4	4	4	3	5	4	4	4	5	5	5	4	4	4	5	5	4	5	5	4	5	5	5	4	5	5	4	3	5	4	4	4	5	4	5
0	3	4	3	4	3	4	4	4	4	4	4															3	4	4	3	3	4	2	4	4	2	4	4	2	4	3	4	4	4	3	4	2	3	3	2
0	5	4	4	4	3	5	4	3	5	4	5	2	3	3	4	3	3	2	4	3	2	4	4	2	4															5	2	4	2	3	5	2	4	5	2
0	3	5	4	5	4	5	4	4	4	4	5															4	1	4	1	4	5	2	4	5	1	5	5	1	5	5	4	4	5	4	4	2	4	4	4
0	5	4	4	2	3	5	4	4	5	2	5	3	1	2	3	3	3	3	2	2	2	4	3	2	3	5	5	5	5	5	5	5	5	5	1	5	5	1	5
0	5	5	5	4	3	5	4	3	5	4	5	5	3	5	3	3	5	4	4	5	2	5	5	1	5															5	2	5	2	3	5	4	4	4	2
0	4	5	4	3	3	4	3	3	5	2	5	5	3	5	3	2	5	2	4	5	2	5	5	1	5	4	4	4	4	3	4	2	3	4	2	4	4	2	5
0	5	4	3	4	3	5	4	4	4	3	5	4	5	4	4	5	4	4	5	5	2	5	5	1	4	5	5	5	5	5	5	4	5	5	2	5	5	5	5
0	2	2	1	5	4	1	2	4	2	2	2	4	2	2	2	2	3	4	3	4	4	4	4	2	2															2	2	2	2	3	2	2	3	3	4
0	4	4	4	4	4	4	4	4	4	4	5	3	4	3	3	4	4	2	4	4	2	3	4	1	4	4	4	3	4	4	4	2	4	4	2	5	5	1	5
0	5	5	5	2	5	5	5	4	5	5	5	3	2	4	2	4	4	2	4	3	2	2	3	4	3															5	5	5	1	4	5	1	4	5	1
0	4	4	3	3	4	4	5	4	4	4	4															2	4	2	4	4	3	4	4	2	5	4	4	2	4	1	4	2	4	4	4	4	4	3	4
0	5	5	2	2	5	5	4	4	5	4	5	4	5	3	5	4	5	1	5	4	3	5	5	1	5	4	5	4	5	5	5	2	5	5	2	5	5	1	5
0	2	3	3	4	3	4	3	2	3	3	3															3	3	4	3	3	3	2	2	4	2	4	3	2	4	3	3	2	3	2	3	2	3	3	2
0	5	5	5	5	5	5	4	5	5	4	5															5	5	5	5	5	5	2	5	5	2	5	5	1	5	5	5	5	5	5	5	2	5	5	2
0	4	5	4	4	4	5	4	5	4	4	5															5	5	5	1	5	5	1	5	1	1	5	5	1	5	5	5	4	1	4	4	2	5	5	1
0	5	5	5	4	5	5	4	4	5	4	5	4	5	5	4	5	5	2	4	5	2	5	5	2	5	5	4	4	4	4	5	2	5	5	2	5	5	2	5
0	4	4	4	2	5	5	2	3	1	3	1															3	3	4	5	2	1	3	2	3	5	2	5	3	4	1	5	4	5	3	4	2	2	1	3
0	4	4	4	2	3	4	2	4	4	4	4															4	3	4	4	3	4	2	4	4	2	4	4	2	4	4	2	4	2	3	4	2	3	4	2
0	2	4	3	4	2	4	3	2	4	2	4															3	4	4	4	4	4	2	4	4	2	4	4	2	4	1	2	2	4	2	2	2	2	1	2
0	4	4	3	4	4	4	4	4	3	4	4	4	2	4	2	4	4	2	4	4	3	4	4	2	4	3	2	4	3	4	3	4	4	3	4	3	4	2	4
0	4	4	5	4	4	4	5	4	4	3	4	4	5	5	2	4	4	3	3	2	3	4	3	4	4	4	4	4	4	4	4	3	4	4	3	3	2	3	3
0	4	4	4	4	4	4	4	4	4	4	4															4	4	4	4	4	4	4	4	4	4	4	4	4	4	4	4	4	4	4	4	4	4	4	4
0	3	4	3	4	4	4	2	4	4	2	5	2	2	2	3	4	4	2	4	4	2	4	4	2	4	4	4	2	4	4	4	2	4	4	2	4	4	2	4
0	4	5	4	4	3	4	5	3	4	3	4	4	5	4	4	4	3	5	5	5	3	4	4	4	5	5	3	5	4	4	5	4	4	3	4	4	5	4	5
0	3	5	4	3	4	5	3	4	4	5	4	3	4	3	4	3	5	4	5	3	4	3	4	4	2															3	4	3	4	3	4	3	4	4	3
0	4	4	4	4	3	4	3	4	4	4	4															3	3	3	2	4	3	2	4	2	2	4	4	2	4	4	3	3	3	4	4	2	4	4	2
0	5	5	4	5	5	5	2	4	5	1	5	3	4	4	4	4	4	1	4	4	2	5	4	1	5	5	5	5	4	5	5	1	5	5	1	5	5	1	5
0	3	1	1	2	1	1	4	1	2	3	2	1	2	2	3	2	2	3	2	1	3	2	2	4	2															3	3	3	3	2	3	3	2	3	3
0	4	4	4	4	3	4	4	3	4	4	4	4	4	4	4	4	4	2	4	4	2	5	5	1	5	4	4	5	4	4	5	2	4	5	2	5	5	1	5
0	4	4	4	4	4	5	4	4	4	4	4	4	4	4	4	4	4	5	4	4	4	4	4	4	4	4	4	4	4	4	4	4	4	4	4	5	4	4	4
0	4	4	4	3	4	4	4	4	4	4	4	4	4	4	4	4	4	2	4	4	2	4	4	1	4	4	4	4	4	4	4	2	4	4	2	4	4	1	4
0	3	3	3	3	3	3	3	3	3	3	3	3	3	3	3	3	3	3	3	3	3	3	3	3	3	3	3	3	3	3	3	3	3	3	3	3	3	3	3
0	4	5	5	4	5	5	4	3	5	4	5															5	5	4	5	4	5	5	4	5	5	5	5	2	5	3	5	5	3	5	5	4	3	4	4
0	1	1	5	3	5	2	1	1	1	1	2	3	1	5	1	2	1	4	5	1	1	5	4	1	2															5	3	2	4	1	1	1	1	1	5
0	4	4	4	4	3	4	3	3	4	3	5	5	4	5	4	5	5	2	5	4	2	4	4	2	3															3	3	3	3	3	3	3	3	3	3
0	4	4	5	4	5	4	4	4	4	3	5															4	5	5	4	4	5	3	4	5	3	5	5	1	5	3	4	4	4	4	4	3	4	3	3
0	4	4	4	3	4	4	5	5	4	4	5	3	3	2	2	3	2	4	4	2	4	1	1	3	3															5	5	4	5	5	5	1	5	5	2
0	5	5	5	3	5	5	1	4	5	2	5	5	4	5	4	4	5	1	4	4	1	5	5	1	5															5	4	5	4	4	5	1	4	5	1
0	4	5	3	4	3	4	3	3	4	3	5	3	3	3	3	3	3	3	4	3	2	3	4	1	4	3	2	4	3	4	4	3	4	3	3	4	4	2	4
0	4	4	3	3	4	3	3	3	4	4	4	3	4	4	4	5	3	4	4	2	3	4	2	3	3															5	3	4	4	3	3	3	4	4	4
0	4	4	4	5	3	5	4	4	4	4	4	4	3	4	3	4	4	3	4	3	4	4	5	2	5															3	3	2	3	3	2	4	3	2	4
0	2	2	3	3	3	3	5	4	1	3	2	2	3	2	3	3	5	3	5	3	1	2	3	3	2															3	3	4	3	3	3	3	2	3	2
0	5	4	4	4	3	4	5	5	4	5	5															5	5	5	5	5	5	2	5	5	4	5	5	1	5	4	4	3	4	4	3	4	3	3	4
0	3	4	3	3	2	3	2	2	3	4	2															2	3	3	3	2	3	3	4	3	2	2	3	3	2	3	4	3	2	3	2	3	3	2	2
0	4	3	2	3	5	2	3	1	2	4	5	3	2	2	4	3	2	3	3	4	3	3	4	2	2															1	4	2	2	4	2	3	4	3	3
0	4	4	4	3	3	4	4	3	4	4	4															3	3	5	3	3	4	2	3	4	3	4	4	2	4	3	4	3	3	2	4	2	3	2	2
0	3	5	4	4	4	5	4	4	5	4	5	3	4	4	4	3	4	2	4	4	2	4	4	1	4	2	4	4	4	3	5	2	4	4	2	5	5	1	5
0	5	5	5	3	5	5	5	5	5	5	5	5	5	5	4	5	5	5	5	5	5	3	4	2	3	5	1	5	5	5	5	1	5	5	1	5	5	1	5
0	3	5	4	5	4	5	2	4	4	2	4	5	4	4	3	5	5	1	5	5	1	4	4	1	4	4	3	4	3	3	4	2	3	4	2	4	4	2	4
0	3	4	3	4	2	4	4	4	4	5	5	3	4	3	2	3	3	2	4	3	2	3	4	1	3	5	5	5	5	4	5	1	4	5	1	5	5	1	5
0	5	5	5	5	5	5	5	5	5	5	5	4	4	3	4	5	3	3	4	3	3	3	4	1	4	5	4	5	4	5	4	1	4	4	1	5	5	1	5
0	5	3	3	1	4	5	3	4	4	3	4															5	4	5	5	4	5	3	4	5	3	5	5	1	5	4	3	3	3	4	3	2	4	4	2
0	5	5	5	5	5	5	5	5	5	5	5	5	5	5	5	5	5	4	5	5	4	5	5	1	5															5	5	5	5	5	5	1	5	5	5
0	5	5	5	5	5	5	5	5	5	5	5															4	5	5	5	5	5	2	5	5	2	5	5	1	5	5	5	5	5	5	5	3	5	5	2
0	5	5	4	5	5	5	4	5	5	5	5	3	4	3	4	5	3	4	4	5	4	3	5	1	3															5	5	3	4	5	5	1	4	3	1
0	3	4	4	4	4	4	2	4	4	2	4															4	1	1	5	5	5	1	5	5	1	5	5	1	5	4	5	5	5	5	5	1	5	5	1
0	2	4	3	4	3	4	4	4	4	2	4	3	2	3	2	3	4	2	4	4	1	4	4	1	4															4	4	2	3	3	3	2	4	3	2
0	4	5	3	4	3	5	5	4	5	4	5	3	3	3	3	4	4	2	4	4	2	4	4	2	4															3	5	3	5	4	3	4	4	3	3
0	4	4	3	5	3	4	4	4	5	4	5	1	3	1	3	2	3	3	2	2	3	3	4	2	3	3	5	4	5	3	4	4	4	4	4	5	5	1	5
0	3	4	2	3	3	3	4	3	3	4	4															4	4	4	3	3	4	3	3	4	2	4	4	2	4	2	3	2	3	3	1	3	3	1	2
0	5	4	4	3	2	2	1	5	3	3	3															5	3	5	4	3	3	3	2	2	4	2	3	4	1	3	4	3	4	4	2	5	2	5	3
0	3	2	2	5	3	3	2	1	2	3	4	1	1	1	1	3	1	1	1	2	1	2	2	3	2															2	3	2	3	3	3	1	4	3	1
0	5	5	4	5	3	5	2	4	5	4	5	5	5	5	5	5	5	5	5	5	2	5	5	1	5	5	1	5	1	5	5	5	5	3	1	5	5	1	5
0	4	4	4	3	5	4	4	4	4	3	4															4	4	5	3	4	4	5	4	3	4	4	4	3	4	4	4	4	4	2	4	3	5	5	3
0	4	4	4	4	3	4	4	4	5	3	4	4	5	4	3	4	5	4	4	3	5	4	4	5	5															4	4	4	5	4	5	3	3	4	4
0	5	5	5	5	5	5	5	3	5	4	5															5	5	5	5	5	5	4	3	5	1	5	5	1	5	5	5	5	1	4	5	1	3	5	1
0	4	3	3	5	3	5	2	4	1	2	5															4	1	4	5	2	3	2	3	5	3	5	2	4	3	3	4	1	2	2	2	5	5	3	4
0	4	4	5	4	3	4	3	3	5	2	5															4	5	4	5	3	5	3	5	5	3	4	5	1	5	4	4	2	4	3	4	3	3	4	3
0	3	4	2	3	2	4	4	4	4	4	4															4	2	4	4	2	4	2	4	4	2	5	5	1	5	4	3	3	2	2	3	2	4	3	2
0	3	5	1	1	1	2	4	1	1	1	3	1	4	1	2	3	5	1	1	1	1	1	1	5	3															1	1	1	1	4	5	1	3	1	2
0	5	5	5	5	4	4	5	4	4	4	4															5	4	5	4	5	4	5	5	4	5	5	5	1	4	4	4	4	5	5	5	4	4	4	5
0	2	3	4	3	4	3	3	3	2	3	2	2	4	3	3	2	3	3	3	3	4	3	4	2	3															1	4	3	3	3	4	5	4	2	3
0	2	3	2	4	2	3	4	2	4	4	4	2	2	2	4	2	2	2	2	2	3	2	3	2	3	5	5	4	4	4	4	5	4	5	5	5	5	1	5
0	3	3	3	4	3	3	4	4	3	4	3	2	2	2	2	3	2	4	4	2	4	2	2	4	2	4	3	4	3	4	4	2	4	4	2	5	5	1	5
0	4	4	5	3	3	5	4	3	5	4	4	4	3	4	3	4	4	2	4	4	2	4	4	1	5	4	3	4	3	4	4	2	4	4	2	5	5	1	5
0	5	4	5	5	3	5	4	4	5	4	5															5	4	5	5	5	5	2	5	5	1	5	5	1	5	4	4	3	4	3	3	4	3	3	4
0	4	4	3	4	3	4	2	4	4	2	4															4	4	3	4	3	4	2	4	4	2	4	4	2	4	3	4	3	4	3	3	2	4	3	2
0	4	5	4	2	4	4	3	4	5	4	5	4	4	4	3	4	4	2	4	4	2	4	4	1	4	4	5	5	1	4	5	2	5	5	2	4	4	1	4
0	4	4	4	4	5	5	1	1	3	1	1	5	4	3	4	1	5	1	1	3	4	5	2	3	4															3	1	1	4	3	5	4	4	4	1
0	5	5	5	4	5	5	3	4	5	2	5															5	4	5	5	5	5	1	4	5	1	5	5	1	5	4	4	3	4	2	5	2	4	3	1
0	3	3	4	3	3	3	4	5	2	4	4															3	4	4	4	3	5	3	2	1	3	4	2	2	3	4	4	3	5	3	2	4	2	5	1
0	4	5	3	4	4	4	3	4	4	4	4	5	3	4	4	4	5	4	4	5	3	5	5	1	5	5	1	5	5	4	5	2	3	5	5	5	5	1	4
0	1	3	1	1	4	4	3	3	3	5	5	2	1	1	5	1	3	4	1	5	2	1	3	3	4	3	5	1	5	3	4	1	2	5	2	2	3	4	2
0	2	4	3	2	3	5	1	3	5	4	5	3	1	3	1	5	4	2	2	4	4	1	5	2	3	4	2	5	3	3	5	1	1	4	1	3	4	2	5
0	1	4	1	3	1	5	4	1	3	1	5															4	4	1	2	1	5	3	1	3	1	3	4	4	2	1	2	5	1	2	4	3	1	1	4
0	4	4	4	4	4	4	4	4	4	4	4	3	4	3	4	4	4	1	4	4	2	5	5	1	5	4	4	4	4	4	5	2	4	4	2	5	5	1	5
0	5	5	5	2	5	5	3	4	5	2	5	5	5	5	2	5	5	5	5	5	5	5	5	1	5															4	3	4	2	4	5	2	4	5	2
0	4	4	4	4	4	4	4	4	4	4	4	4	4	4	4	4	4	4	4	4	4	4	4	2	4	5	5	5	5	5	5	2	5	5	1	5	5	1	5
0	2	2	3	3	2	3	4	3	4	3	4															3	4	3	3	3	2	3	4	2	4	3	4	3	2	3	3	3	4	2	2	4	2	3	4
0	4	4	4	4	4	4	4	4	4	4	4															4	2	4	4	4	4	2	4	4	2	4	4	4	4	3	4	4	3	4	4	2	3	2	4
0	2	3	3	4	4	3	2	5	3	5	3	3	4	2	2	5	5	3	3	5	4	3	2	4	4	5	2	5	2	2	5	4	2	1	3	3	5	3	2
0	4	4	2	4	3	3	5	4	3	4	5	2	3	3	3	3	3	3	3	3	3	2	3	3	2															4	3	2	1	2	2	1	1	2	1
0	4	4	4	4	4	4	4	4	4	4	4	4	5	4	4	4	4	2	4	4	2	4	4	2	4															4	4	3	4	4	4	2	4	4	2
0	4	3	3	4	4	4	4	4	3	4	4	3	2	4	4	4	3	2	4	3	2	4	4	1	4	2	3	3	4	4	4	4	4	4	4	5	4	1	5
0	4	2	3	4	4	4	5	4	5	4	3	4	3	4	4	5	4	4	5	3	2	4	5	4	3	4	4	3	4	4	3	2	3	5	4	4	3	2	4
0	4	4	4	3	4	4	4	4	4	4	4	4	3	4	3	4	4	2	4	4	2	4	4	1	4															4	4	4	4	4	4	3	4	4	3
0	1	1	1	3	1	2	3	1	1	1	3	1	1	1	1	1	1	1	1	1	1	1	1	5	1	1	1	1	1	3	1	1	3	1	5	3	1	3	1
0	4	4	4	4	3	4	3	4	4	3	4	3	3	3	3	3	3	3	3	3	3	3	3	3	3	3	4	3	4	3	3	4	3	3	4	4	3	3	4
0	4	5	4	2	3	5	2	4	5	4	4															4	4	4	4	4	4	2	4	4	4	4	4	2	4	4	4	4	2	4	4	2	3	4	2
0	3	4	3	5	3	5	5	2	3	5	4	3	4	5	4	4	4	2	4	4	4	5	5	1	5	2	4	3	4	4	3	3	3	4	3	4	4	2	4
0	3	5	2	1	2	3	3	2	4	4	4	3	2	4	3	2	2	2	2	4	2	4	4	1	4	4	1	4	1	1	5	1	1	4	2	5	5	1	5
0	5	4	4	2	4	4	5	5	4	5	5	3	2	3	2	4	4	3	4	3	1	4	4	2	4															3	3	4	3	4	4	4	4	4	3
0	1	3	3	2	3	3	2	5	3	3	3															3	3	2	3	4	2	2	5	3	3	4	4	4	4	3	4	3	3	3	2	2	3	4	3
0	4	4	4	4	4	4	4	4	4	4	4															3	4	4	4	3	3	2	4	3	3	4	4	2	4	3	4	4	4	4	4	2	4	4	2
0	4	5	4	2	4	4	5	4	4	5	4	3	3	3	3	4	4	4	4	3	4	4	4	2	4	4	4	5	5	4	4	4	4	4	2	5	4	2	4
0	4	4	4	4	3	4	4	3	4	4	4	2	3	2	3	3	2	3	3	2	3	3	4	2	3															3	5	3	5	3	3	2	3	2	4
0	4	5	4	3	4	4	3	4	4	3	5	3	4	3	3	4	4	3	4	4	3	4	4	2	4															4	3	3	3	3	4	3	3	4	2
0	5	4	4	5	4	5	4	4	5	5	4															4	3	4	4	4	4	4	3	4	4	4	4	2	4	3	4	3	3	3	3	2	3	4	3
0	4	3	4	3	4	4	3	4	3	4	4	4	3	3	4	4	4	4	4	4	4	4	4	4	4	3	4	4	4	4	3	4	4	4	3	4	4	4	4
0	4	5	4	2	4	4	4	3	4	4	5															4	4	4	4	4	4	2	3	3	2	4	5	1	5	4	4	3	4	4	4	2	4	4	1
0	4	4	4	4	4	4	3	3	4	3	4															4	4	4	4	4	4	2	4	4	2	4	4	2	4	4	4	4	4	4	4	2	4	4	2
0	5	4	4	5	3	5	4	3	4	5	5	5	4	4	5	4	4	1	5	4	1	5	5	1	5															3	3	3	4	4	3	3	4	2	3
0	5	5	5	5	5	5	4	5	5	5	4															4	4	5	5	5	5	4	4	5	2	5	5	1	5	5	4	5	2	4	5	5	4	5	4
0	3	4	3	4	3	4	4	3	4	4	4	4	3	3	4	3	4	2	4	4	2	4	4	2	4	3	4	3	4	3	4	4	4	4	2	4	4	2	4
0	4	4	4	4	4	4	4	4	4	4	4	3	3	3	3	4	3	2	4	3	2	4	4	2	4															4	4	4	2	4	4	2	4	4	2
0	5	5	5	3	4	5	4	4	5	5	5															5	3	5	3	4	5	1	4	5	2	5	5	1	5	4	3	3	3	4	5	1	4	5	1
0	5	5	5	5	4	5	5	5	5	5	5															5	5	4	4	3	4	4	4	4	3	5	5	3	5	4	5	4	5	4	4	2	4	4	2
0	2	3	2	4	4	2	4	4	2	4	2	2	2	2	2	2	2	2	2	2	2	2	2	3	2															3	2	2	4	2	3	2	2	3	2
0	3	3	3	3	3	3	4	4	3	4	4	3	2	4	3	3	3	4	3	3	3	3	4	4	3	3	3	3	4	4	3	3	4	4	4	3	4	2	3
0	3	2	3	5	2	3	2	3	3	4	2															3	4	3	3	4	3	4	4	2	4	4	4	1	4	2	1	2	1	2	4	5	2	3	2
0	5	5	5	3	5	5	5	5	5	5	5	3	3	5	3	4	3	2	3	3	2	5	4	1	3															3	3	3	3	3	3	3	3	3	1
0	4	4	3	5	4	3	3	4	3	3	5	4	4	4	3	4	4	4	5	4	4	5	4	2	4	4	4	4	4	5	3	4	4	4	4	4	4	1	5
0	4	4	4	4	4	4	4	4	4	4	4															4	4	4	4	4	4	2	4	4	2	5	5	1	5	4	4	4	2	4	4	2	4	4	2
0	3	2	3	4	3	4	4	2	3	4	3	2	2	1	2	3	2	4	2	2	4	2	3	3	2															3	2	2	2	2	2	2	3	2	2
0	4	5	5	5	4	4	3	4	4	4	4	5	4	4	5	4	4	4	4	4	3	4	4	4	5															4	4	3	2	3	4	5	5	4	4
0	3	3	2	5	4	2	3	5	2	3	3	1	1	1	1	4	1	2	4	1	2	2	2	3	1	2	3	4	2	4	4	2	4	5	2	5	5	1	5
0	4	4	4	5	4	4	4	4	4	4	4	4	4	4	4	4	4	2	4	4	2	4	4	2	4															4	4	3	4	4	4	2	4	3	2
0	4	5	3	4	3	4	5	4	4	4	4	3	4	4	4	3	4	2	4	4	2	4	5	1	4	5	3	5	3	3	5	2	4	4	2	5	5	2	5
0	3	4	3	4	4	3	4	3	3	4	4	5	3	5	4	4	4	2	5	4	1	4	4	1	4															3	4	3	4	3	3	4	3	4	4
0	5	5	4	4	3	5	5	4	5	5	5	4	4	4	4	3	4	4	4	3	4	3	4	1	4	3	3	4	2	3	4	2	4	5	2	4	4	2	4
0	4	4	2	4	4	4	4	4	4	5	5	2	4	2	4	4	3	2	4	3	2	4	4	2	4	2	4	2	4	4	4	4	4	3	4	4	4	1	4
0	4	4	4	4	4	5	4	4	4	4	5															5	4	4	4	4	4	3	4	4	4	5	5	1	5	4	4	4	4	4	4	3	4	4	3
0	4	5	4	4	5	5	4	4	4	5	5	4	4	5	4	4	4	5	4	4	5	4	5	4	4	4	4	5	4	4	5	4	4	5	4	4	4	4	5
0	4	4	4	4	4	4	4	4	4	4	4	4	4	4	4	4	4	4	4	4	4	4	4	4	4															4	5	4	5	4	4	4	4	4	5
0	4	4	3	4	4	4	4	4	4	4	4	2	2	2	2	2	2	2	2	2	2	2	2	2	2	4	4	4	4	4	4	4	4	4	4	4	4	4	4
0	2	5	5	3	2	4	4	4	5	3	4															4	3	5	2	3	4	4	4	5	4	3	4	5	4	4	4	2	5	3	4	4	4	3	5
0	4	4	5	5	5	5	5	4	4	5	5															4	4	4	5	5	5	5	5	5	4	4	5	5	5	4	5	5	5	3	5	4	4	4	5
0	5	5	5	4	4	4	5	4	4	4	4	3	5	5	5	5	5	4	4	4	4	5	4	4	4	5	5	5	3	4	4	5	4	4	4	4	4	4	4
0	3	4	3	4	3	4	3	3	4	2	4	4	4	4	3	4	4	2	4	4	2	4	4	2	4	4	4	4	4	4	4	2	4	4	2	4	4	2	4
0	1	2	1	5	3	1	2	3	1	1	3	1	1	1	1	2	1	1	2	1	1	3	2	2	3	1	1	3	1	1	1	2	2	3	3	3	3	2	3
0	2	4	4	3	3	3	3	3	2	5	1															4	5	2	2	3	2	2	4	4	5	3	1	1	2	2	2	2	2	2	1	1	1	1	2
0	4	4	4	3	4	4	2	4	4	3	5															4	4	4	4	4	4	3	4	4	4	5	5	1	5	4	3	4	4	4	4	2	4	4	2
0	3	2	4	2	1	3	4	4	5	5	2															2	5	4	5	2	4	3	4	3	1	5	3	4	2	2	5	4	4	2	5	3	3	4	1
0	4	4	4	2	4	4	4	4	4	4	4	4	4	4	4	4	4	2	4	4	2	4	4	2	4	2	4	3	4	4	4	2	4	4	2	4	4	2	4
0	3	3	4	4	4	4	4	4	4	4	4															4	4	4	4	4	4	2	4	4	4	5	5	2	5	4	5	5	5	4	5	2	4	4	2
0	5	5	5	4	4	5	2	4	5	2	5	4	4	3	3	4	3	2	4	4	3	4	4	2	4															4	4	3	4	4	3	2	4	3	2
0	3	3	3	3	4	4	3	3	3	3	3															4	4	4	4	4	4	3	4	3	3	4	4	2	4	3	3	2	3	4	3	2	3	3	3
0	4	5	5	4	3	2	2	3	2	2	3	2	2	3	3	5	3	4	2	5	4	5	5	4	5	2	4	3	5	3	4	5	3	2	2	3	3	4	4
0	4	3	4	3	4	4	4	4	4	3	4	4	4	4	3	4	4	4	4	5	4	3	4	4	3	4	3	4	3	4	4	4	4	4	3	3	4	4	4
0	5	5	5	4	4	5	5	4	4	5	5	4	5	5	4	5	4	5	5	5	4	5	5	5	5	4	5	5	5	5	5	5	5	5	5	5	5	5	5
0	2	2	2	3	2	2	2	2	2	2	3	1	1	2	1	1	1	1	1	1	1	1	1	5	1	2	1	1	3	1	1	3	3	1	1	4	2	2	4
0	4	5	4	5	1	2	3	4	3	2	3															4	5	4	5	3	1	3	2	2	4	3	2	5	1	5	1	1	2	3	3	5	4	2	4
0	1	3	5	3	3	4	2	5	4	2	2	1	4	2	5	1	2	1	5	4	3	3	5	2	1	3	3	5	3	4	1	4	1	5	2	5	4	2	3
0	4	5	5	5	5	5	5	5	5	4	5	5	5	5	5	5	5	5	5	5	4	4	5	4	5															4	4	5	5	4	5	5	4	5	4
[truncated: 1,002 more rows]
[truncated: 27 more columns]
